# Supplementary material for: Health system readiness for non-communicable diseases at the primary care level: a systematic review
Source: PubMed Central journal article supplement — BMJ Open. 2022 Feb 9;12(2):e060387. doi: 10.1136/bmjopen-2021-060387 (PMC8830230; doi:10.1136/bmjopen-2021-060387), 2022-02-09
Supplement: bmjopen-2021-060387.draft_revisions.pdf [file bmjopen-2021-060387.draft_revisions.pdf]

# BMJ Open

BMJ Open is committed to open peer review. As part of this commitment we make the peer review history of every article we publish publicly available.

When an article is published we post the peer reviewers' comments and the authors' responses online. We also post the versions of the paper that were used during peer review. These are the versions that the peer review comments apply to.

The versions of the paper that follow are the versions that were submitted during the peer review process. They are not the versions of record or the final published versions. They should not be cited or distributed as the published version of this manuscript.

BMJ Open is an open access journal and the full, final, typeset and author-corrected version of record of the manuscript is available on our site with no access controls, subscription charges or pay-per-view fees (<http://bmjopen.bmj.com>).

If you have any questions on BMJ Open's open peer review process please email [info.bmjopen@bmj.com](mailto:info.bmjopen@bmj.com)

# BMJ Open

## Health system readiness for non-communicable diseases at the primary care level: A systematic review

|                               |                                                                                                                                                                                                                                                                                                                                  |
|-------------------------------|----------------------------------------------------------------------------------------------------------------------------------------------------------------------------------------------------------------------------------------------------------------------------------------------------------------------------------|
| Journal:                      | <i>BMJ Open</i>                                                                                                                                                                                                                                                                                                                  |
| Manuscript ID                 | bmjopen-2021-060387                                                                                                                                                                                                                                                                                                              |
| Article Type:                 | Original research                                                                                                                                                                                                                                                                                                                |
| Date Submitted by the Author: | 21-Dec-2021                                                                                                                                                                                                                                                                                                                      |
| Complete List of Authors:     | Kabir, Ashraful; Monash University, School of Public Health and Preventive Medicine<br>Karim, Md; Monash University, SPHPM;<br>Islam, Rakibul; Monash University, Women's Health Research Program<br>Romero, Lorena ; The Ian Potter Library, Ground Floor, AMREP Building, The Alfred<br>Billah, Baki; Monash University, SPHPM |
| Keywords:                     | PRIMARY CARE, PUBLIC HEALTH, SOCIAL MEDICINE                                                                                                                                                                                                                                                                                     |
|                               |                                                                                                                                                                                                                                                                                                                                  |

SCHOLARONE™  
Manuscripts

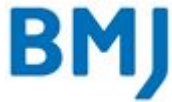

I, the Submitting Author has the right to grant and does grant on behalf of all authors of the Work (as defined in the below author licence), an exclusive licence and/or a non-exclusive licence for contributions from authors who are: i) UK Crown employees; ii) where BMJ has agreed a CC-BY licence shall apply, and/or iii) in accordance with the terms applicable for US Federal Government officers or employees acting as part of their official duties; on a worldwide, perpetual, irrevocable, royalty-free basis to BMJ Publishing Group Ltd ("BMJ") its licensees and where the relevant Journal is co-owned by BMJ to the co-owners of the Journal, to publish the Work in this journal and any other BMJ products and to exploit all rights, as set out in our [licence](#).

The Submitting Author accepts and understands that any supply made under these terms is made by BMJ to the Submitting Author unless you are acting as an employee on behalf of your employer or a postgraduate student of an affiliated institution which is paying any applicable article publishing charge ("APC") for Open Access articles. Where the Submitting Author wishes to make the Work available on an Open Access basis (and intends to pay the relevant APC), the terms of reuse of such Open Access shall be governed by a Creative Commons licence – details of these licences and which [Creative Commons](#) licence will apply to this Work are set out in our licence referred to above.

Other than as permitted in any relevant BMJ Author's Self Archiving Policies, I confirm this Work has not been accepted for publication elsewhere, is not being considered for publication elsewhere and does not duplicate material already published. I confirm all authors consent to publication of this Work and authorise the granting of this licence.

1  
2  
3 **1 Review Title:**

4 2 Health system readiness for non-communicable diseases at the primary care level: A systematic  
5 3 review  
6 4  
7 5  
8 6  
9 7  
10 8  
11 9

12  
13 **9 Short Title:**

14  
15  
16 10 Health system readiness for non-communicable diseases: A systematic review  
17 11  
18 12  
19 13

20  
21  
22  
23  
24  
25  
26 13 Ashraful Kabir<sup>1\*</sup>, Md Nazmul Karim<sup>1</sup>, Rakibul Islam<sup>1</sup>, Lorena Romero<sup>2</sup>, Baki Billah<sup>1</sup>  
27  
28

29 14 <sup>1</sup> Department of Epidemiology and Preventive Medicine, School of Public Health and Preventive  
30 15 Medicine, Monash University, Melbourne, Australia  
31  
32  
33

34 16 <sup>2</sup> The Ian Potter Library, The Alfred, Melbourne, Australia  
35  
36  
37 17

38  
39  
40 18 \* Corresponding author  
41  
42

43 19 Ashraful Kabir  
44  
45

46 20 Department of Epidemiology and Preventive Medicine  
47  
48

49 21 School of Public Health and Preventive Medicine  
50  
51

52 22 Monash University, Melbourne, Australia  
53  
54

55  
56 23 Phone: +61 0431249851  
57

58 24 Email: [md.kabir@monash.edu](mailto:md.kabir@monash.edu)  
59  
60

## 25 **Abstract**

26 **Objective:** To synthesise evidence on the primary healthcare system's readiness for preventing and  
27 managing non-communicable diseases (NCDs).

28 **Design:** Systematic review.

29 **Data sources:** Ovid MEDLINE, EMBASE, CINAHL, PsycINFO and Scopus were searched from 1  
30 January 1984 to 30 July 2021, with hand-searching references and expert advice.

31 **Eligibility criteria:** Any English-language health research with evidence of readiness/preparedness of  
32 the health system at the primary healthcare level in the context of four major NCDs: diabetes mellitus,  
33 cancer, chronic respiratory diseases, and cardiovascular diseases.

34 **Data extraction and synthesis:** Two authors independently extracted data and assessed the bias. The  
35 full-text selected articles were then assessed using the Mixed Methods Appraisal Tool. Health system  
36 readiness was descriptively and thematically synthesized in line with the health system dynamics  
37 framework.

38 **Results:** Out of 7,843 records, 23 papers were included in this review (15 quantitative, three qualitative  
39 and five mixed-method studies). The findings showed that existing literature predominantly examined  
40 health system readiness from the supply-side perspective as embedded in the World Health  
41 Organization's health system framework. However, at the primary healthcare level, these components  
42 are insufficiently prepared for NCDs. Among NCDs, higher levels of readiness were reported for  
43 diabetes mellitus and hypertension in comparison to chronic respiratory diseases (asthma, chronic  
44 obstructive pulmonary disease), cardiovascular diseases and cancer. There has been a dearth of research  
45 on the demand-side perspective, which is an essential component of a health system and must be  
46 addressed in future research.

47 **Conclusion:** The supply-side components at the primary healthcare level are inadequately ready to  
48 address the growing NCD burden. Improving supply-side factors, with a particular focus on chronic  
49 respiratory diseases, cardiovascular diseases and cancer, and improving understanding of the demand-  
50

1  
2  
3 50 side components of the health system's readiness, may help to prevent and manage NCDs at the primary  
4  
5 51 healthcare level.

6  
7  
8 52 **Keywords:** non-communicable diseases, health system readiness, primary health care, systematic  
9  
10 53 review

## 11 12 13 54 **Strengths and limitations of this study**

- 14  
15  
16  
17 55 • Data synthesis was informed by the health system dynamics framework, which offers a deeper  
18  
19 56 and more comprehensive (both supply-side and demand-side factors) understanding of primary  
20  
21 57 healthcare system readiness for NCDs.
- 22  
23 58 • We conducted an extensive systematic search of literature with hand-searching references and  
24  
25 59 expert advice regarding health system readiness for non-communicable diseases at the primary  
26  
27 60 care level, which increases the validity and trustworthiness of this review's findings.
- 28  
29 61 • Meta-analysis was not possible due to heterogeneity of study designs, methods and techniques,  
30  
31 62 as well as the studies' focus on a variety of health system components.
- 32  
33 63 • A few studies that reported health system readiness at combined primary and secondary  
34  
35 64 healthcare levels were excluded.
- 36  
37  
38  
39  
40  
41  
42  
43  
44  
45  
46  
47  
48  
49  
50  
51  
52  
53  
54  
55  
56  
57  
58  
59  
60

## 73 Introduction

74 Globally, non-communicable diseases (NCDs) are the leading causes of deaths and disabilities,  
75 accounting for 41 million deaths (71% of all deaths) annually (1), with 77% occurring in low- and  
76 middle-income countries (1, 2). The current increased NCD burden may be due to the rise of the ageing  
77 population, rapid and/or unplanned urbanisation and lifestyle-related factors (e.g. physical inactivity,  
78 unhealthy diets and consumption of tobacco products and alcohol) (3). If current trends continue, the  
79 estimated cumulative deaths from NCDs will reach 52 million by 2030 (3), and NCD-related cost was  
80 projected to be US\$ 47 trillion between 2010 and 2030 (4). NCDs' predicted health outcomes and  
81 economic burden will have adverse consequences, such as prolonged illness or disability, greater  
82 treatment costs, loss of productivity and substantial opportunity cost, which will eventually affect  
83 households' economy and well-being (4, 5). The impact of NCDs may result in increased poverty,  
84 higher inequality and low quality of life. Considering the immense influence of NCDs, many  
85 commitments and control strategies have been made at the global, national and local levels to prevent  
86 and manage them (6-8). The Sustainable Development Goals, for example, by 2030, targeted one-third  
87 reduction of premature deaths from the four major NCDs of diabetes mellitus (DM), cancer, chronic  
88 respiratory diseases (CRDs) and cardiovascular diseases (CVDs) (8, 9) among people aged 30–69.

89  
90 Primary healthcare is crucial for promoting essential healthcare services and achieving improved health  
91 outcomes, particularly in countries with resource-poor settings (3, 10-12). Growing evidence shows that  
92 a well-functioning primary healthcare system has immense potential for improving global health  
93 outcomes due to its extensive coverage, cost-effectiveness, well-structured network of healthcare  
94 facilities, affordable technologies, socially and culturally acceptable intervention methods and broad  
95 community participation (10, 13, 14). NCD prevention and management differ from that of acute  
96 conditions, where the primary healthcare approach has a powerful impact. Unlike acute conditions,  
97 NCD prevention and management require extended or even life-long healthcare support, early case  
98 detection, psychosocial promotion, risk factor identification, self-management, behavioural  
99 modifications and regular medical support, such as adherence to medical procedures and treatment (3).

1  
2  
3 100 The primary healthcare system is typically the first-line contact for individuals seeking care, making it  
4  
5 101 easier for patients to continue follow-up contacts (15). Therefore, it can be viewed as the most effective  
6  
7 102 and appropriate mechanism for addressing NCDs.  
8  
9

10 103

11  
12 104 While the literature emphasises the roles and importance of the primary healthcare system in preventing  
13  
14 105 and managing NCDs following a dozen of global commitments and strategies, little is known about the  
15  
16 106 extent to which it is ready to deliver NCD services (16, 17). The concept of ‘health system readiness’  
17  
18 107 is often explained in terms of the health system ‘components’ or ‘framework’. Until recently, health  
19  
20 108 system readiness was mostly defined and presented in the context of the World Health Organization’s  
21  
22 109 (WHO) health system framework, proposed in 2008, which described six ‘key elements’ or ‘building  
23  
24 110 blocks’: health service delivery, health workforce, health financing, health information system,  
25  
26 111 leadership and governance, medical products, knowledge and technologies (18). However, the WHO’s  
27  
28 112 model is viewed as having limited capacity to comprehensively explain how and whether different  
29  
30 113 health system elements within a broader societal context interact and are influenced, as well as how  
31  
32 114 population/individual behaviour and choices and the process impact this mechanism (19, 20). In order  
33  
34 115 to provide an exhaustive understanding of system interactions, van Olmen et al. proposed the ‘health  
35  
36 116 system dynamics framework’, which included the WHO’s six building blocks and concurrent literature.  
37  
38 117 It is comprised of 10 elements that analyse their interactions and functions under a broader societal  
39  
40 118 context (21).  
41  
42  
43  
44

45 119

46  
47 120 Guided by the ‘health system dynamics framework’, this systematic review aimed to synthesise the  
48  
49 121 current evidences on primary healthcare system readiness and evaluate its response to NCDs on a global  
50  
51 122 scale. The findings of this review will help policymakers, public health planners and researchers focus  
52  
53 123 on the further actions required to establish a well-prepared health system at the primary healthcare level  
54  
55 124 to address the growing NCD burden.  
56  
57

58 125  
59  
60



1  
2  
3 126  
4  
56 127 **Methods**7  
8 128 **Protocol and registration**9  
10  
11 129 This review was conducted following the Preferred Reporting Items for Systematic Reviews and Meta-  
12  
13 130 Analysis (PRISMA) guideline (22) and was registered on the Research Registry  
14  
15 131 (REVIEWREGISTRY1163).  
1617  
18 132 **Inclusion criteria**19  
20  
21 133 This review included studies that reported on the readiness/preparedness of various health system  
22  
23 134 components at the primary healthcare level in the context of four major NCDs: DM, cancer, CRDs and  
24  
25 135 CVDs. Where studies reported health system preparedness at the primary and secondary care level  
26  
27 136 combined, only information related to the primary healthcare level was included. However, studies in  
28  
29 137 which the primary and secondary care level data could not be separated were excluded.  
3031  
32 138 **Exclusion criteria**33  
34  
35 139 Studies on other NCDs such as arsenicosis, kidney diseases, mental health disorders, hearing disability,  
36  
37 140 oral disease, birth defects and road injuries were excluded. Papers that focused on NCD  
38  
39 141 interventions/programmes beyond the primary healthcare level were likewise excepted. Editorials,  
40  
41 142 letters, opinion articles, narrative or systematic reviews, study protocols, conference abstracts, posters,  
42  
43 143 reports, and book chapters were also not considered. Additionally, works that were published in a  
44  
45 144 language other than English were excluded.  
4647  
48 145 **Data sources and search strategy**49  
50  
51 146 The search strategy aimed to find English language studies in five databases (Ovid Medline, Ovid  
52  
53 147 Embase, Ovid PsycInfo, CINAHL and Scopus) published between 1 January 1984 and 30 July 2021  
54  
55 148 (Figure 1). The WHO's health system model proposed in 1984 was considered appropriate to identify  
56  
57 149 and assess the key components of the primary healthcare system. The studies published in 1984 onward  
58  
59 150 were deemed to be relevant to this review. Therefore, the earliest date of the search was set to ensure  
60

1  
2  
3 151 the optimum number of studies published since 1984. The search strategies used a combination of  
4  
5 152 subject headings and free text terms that aimed to cover the areas of (1) non-communicable diseases  
6  
7 153 (e.g., chronic disease or chronic conditions or chronic disorders), AND (2) primary health system (e.g.  
8  
9 154 primary health service or first-level healthcare facility or local health system or local-level health  
10  
11 155 facility) AND (3) readiness or preparedness or capacity.

12  
13  
14 156 Searches were adapted as appropriate to the specifications of each of the 5 databases. The final searches  
15  
16 157 are presented in the (Supplementary Appendix file). Hand-searching and reference checking of  
17  
18 158 citations and reference lists were undertaken, and additional records were identified through personal  
19  
20 159 consultations with experts, including researchers, administrators, policy planners, and public health  
21  
22 160 practitioners.

23  
24  
25 161

26  
27  
28 162

29  
30 163 **[FIGURE 1 SHOULD BE INSERTED HERE]**

31  
32 164

33  
34  
35 165

36  
37 166

38  
39  
40 167

41  
42 168

43  
44  
45 169

46  
47  
48 170

49  
50 171

51  
52 172

53  
54  
55 173

56  
57  
58 174

59  
60

175

Figure 1 PRISMA flowchart for study inclusion.

176

177

178

## 179 **Data extraction**

180 Three authors were involved in the data extraction process. First, records identified through database  
181 and manual searches were imported into the Endnote library (EndNote X9.2, Thomson Reuters 2019).  
182 Afterwards, the duplicate records were removed. Next, two authors (AK and NK) independently  
183 screened the studies based on their titles and/or abstracts. The full-text selected articles were then  
184 assessed using the inclusion and exclusion criteria and the standard quality assessment. When  
185 inconsistencies and discrepancies arose, a senior author (BB) was brought in to resolve the  
186 disagreements through discussion and consensus. A standardised data extraction sheet was developed  
187 and piloted. The extraction sheet contains the following study-specific information: authors, publication  
188 year, country, study aims, study design and settings, sample size and participants, data collection  
189 method and tool used, NCD/risk factor studied, health system component focus and key findings.

## 190 **Quality assessment**

191 The Mixed Methods Appraisal Tool (MMAT) was used to assess the methodological quality of the  
192 included studies (23). The distribution of MMAT scores varied with the study design and the evaluation  
193 of some selected parameters. The score is 25% when quantitative study (QUAN) = 1, qualitative study  
194 (QUAL) = 1 or mixed-method study (MM) = 0. It is 50% when QUAN = 2, QUAL = 2 or MM = 1;  
195 75% when QUAN = 3, QUAL = 3 or MM = 2; and it is 100% when QUAN = 4, QUAL = 4 or MM =  
196 3. Thus, each study was given a score ranging from 25% to 100% (Table 1). Two authors (AK and NK)  
197 independently assessed the studies' quality, and the senior author (BB) cross-checked them.  
198 Discrepancies and disagreements were resolved through discussion.

199

200

201

202 Table 1 Type of research design and associated quality of included studies (n=23)

| Study design  | Number of studies (%) | MMAT score (%) |    |    |     |
|---------------|-----------------------|----------------|----|----|-----|
|               |                       | 25             | 50 | 75 | 100 |
| Quantitative  | 15 (65)               | -              | 5  | 7  | 3   |
| Qualitative   | 3 (13)                | -              | 1  | 2  | -   |
| Mixed-methods | 5 (22)                | 1              | 2  | 2  | -   |

203 Note. Entries in the table show the number of studies

## 205 Data synthesis

206 Data analysis was guided by the health system dynamics framework (24). The following themes were  
 207 synthesised using this framework: (i) health service delivery, (ii) healthcare workforce, (iii) health  
 208 financing, (iv) access to medical products and knowledge/technologies, (v) health information system,  
 209 (vi) leadership and governance and (vii) community perspective. Under these themes, data from  
 210 quantitative studies were reported descriptively using frequencies or percentages, while qualitative  
 211 studies were synthesised by determining themes. In this process, a few steps were followed: (i)  
 212 familiarising, (ii) identifying themes (health system components), (iii) indexing, (iv) charting and (v)  
 213 mapping and interpreting. Data from mixed-methods studies were analysed both descriptively and  
 214 thematically analysed. The heterogeneous study design of the included studies precluded a meaningful  
 215 meta-analysis in this review.

## 216 Ethics statement

217 This review has been done as part of a PhD project. The project has been approved by the Monash  
 218 University Human Research Ethics Committee (Project ID: 27112) and Bangladesh Medical Research  
 219 Council (Ref: BMRC/NREC/2019-2022/270).

## 220 Patient and public involvement

221 There was no patient or public involvement.

## 223 Results

## 224 **General characteristics of the study**

225 Initially, 7,843 studies were retrieved, from which 2,213 duplicates were excluded (Figure 1). Then,  
226 5,630 studies were excluded based on a title and abstract review, with 107 meeting the inclusion criteria  
227 for a full-text review. Following the full-text review, 23 studies were ultimately included in this study  
228 (Table 2): 15 were quantitative (cross-sectional) (25-39), three were qualitative (40-42) and five were  
229 mixed-method studies (43-47). Most of the research was conducted in resource-poor settings (20  
230 studies), mostly in sub-Saharan Africa and South Asian countries. Eighteen studies focused on the  
231 health service delivery component at the primary healthcare level, while four studies addressed the  
232 leadership and governance (Fig-2a). Eight studies were conducted in the South Asian-East Asia Region  
233 (SEAR), and only a single study (n=1) was performed in both the Region of the Americas (AMR) and  
234 the European Region (EUR). One study involved multiple nations (Benin, Eritrea, Sudan, Syria,  
235 Bhutan, Sri Lanka, Vietnam and Suriname) (Fig-2b). DM was the most studied NCDs, with 12 studies  
236 reported on it, while mental illness (MI) was the least researched, with only two studies (Fig-2c) focused  
237 on it. Thirteen studies addressed multiple NCDs, six focused on a single NCD and four did not mention  
238 any specific NCD (e.g. termed chronic diseases) (Fig-2d).

241 **[FIGURE 2 SHOULD BE INSERTED HERE]**

243 **Figure 2** Number of published studies that investigated the primary healthcare system's readiness  
244 between January 1984 and July 2021, broken down by NCD type, NCD focus and WHO region.

247 Note. AFR: African Region, AMR: Region of the Americas, SEAR: South East-Asian Region, EUR:  
248 European Region, WPR: Western Pacific Region, CRD: Chronic Respiratory Diseases, CVD:  
249 Cardiovascular Diseases, DM: Diabetes Mellitus, HTN: Hypertension, MI: Mental Illness, HSD: Health  
250 Service Delivery, HW: Health Workforce, HF: Health Financing, HIS: Health Information System,  
251 L&G: Leadership and Governance, MPK&T: Medical Products, Knowledge and Technologies.

252 Table 2 Summary – Characteristics of the studies included in this review

| Author (Year)                        | Country     | Study aims                                                                    | Study design and settings               | Sample size and participants                                  | Data collection method and tool used                               | NCDs/Risk factors studied            | Health system components' focus | Key findings/NCD Readiness                                                                                                                                                |
|--------------------------------------|-------------|-------------------------------------------------------------------------------|-----------------------------------------|---------------------------------------------------------------|--------------------------------------------------------------------|--------------------------------------|---------------------------------|---------------------------------------------------------------------------------------------------------------------------------------------------------------------------|
| Biswas et al. (2018) (38)            | Bangladesh  | To assess health facilities' readiness to manage CVD and DM                   | Quantitative; Countrywide               | 319 healthcare facilities                                     | Survey; Modified WHO SARA questionnaire                            | CVD, DM                              | HSD, HW, MPK&T                  | 58% DM, and 24.1% CVD services were available.                                                                                                                            |
| Islam et al. (2016) (29)             | Bangladesh  | To assess the availability and provision of NCD service delivery              | Quantitative; One district              | 50 health facilities                                          | Survey; Modified WHO SARA questionnaire                            | CRD, CVD, DM                         | HSD                             | 52% CRD, 73% CVD and DM 52% services were available.                                                                                                                      |
| NIPORT++ (2020) (39)                 | Bangladesh  | To assess health facilities' readiness to manage cancer, CRD, CVD, DM and HTN | Quantitative; Countrywide               | 1524 healthcare facilities                                    | Survey; Modified DHS questionnaire                                 | Cancer, CRD, CVD, DM, HTN            | HSD, HW, MPK&T                  | Availability of services varied from CCs to UHCs: cervical cancer (0.4%-37.5%), CRD (34.1%-93.9%), CVD (1.4%-69.6%), DM (0.9%-84.5%), and hypertension (3.5%-91.5%).      |
| Nyame et al. (2019) (34)             | Ghana       | To assess health facilities' capacity to implement the WHO PEN pilot          | Quantitative; Three regions             | 23 health facilities                                          | Survey; Modified WHO PEN questionnaire                             | NCD focus was not specified          | HSD, HW, HF                     | Health facilities had inadequate capacity to implement WHO-PEN interventions.                                                                                             |
| Elias et al. (2017) (43)             | India       | To investigate the local health system's preparedness for DM and HTN          | Mixed-methods; One district             | 1,149 patients, 39 healthcare staff, 30 pharmacists, 14 FGDs± | Survey; Non-validated questionnaire; Interview; IDI and FGD guides | DM, HTN                              | HSD, MPK&T                      | Public healthcare facilities had insufficient capacity for HTN and DM service delivery due to inadequate diagnostic capacity and frequent medicine stockouts.             |
| Akhare et al. (2015) (35)            | India       | To identify facility-level gaps that affect CVD care and management           | Quantitative; 24 districts              | 85 medical officers                                           | Survey; Modified WHO PEN questionnaire                             | DM, HTN                              | HSD, HW, MPK&T                  | The community health centre had a relatively better CVD management capacity than the primary health centre but lacked sufficient equipment, medicine and human resources. |
| Panda et al. (2018) (42)             | India       | To describe the health system's response and preparedness to NCDs             | Qualitative; One district               | 13 key stakeholders                                           | Interviews; IDI guide                                              | Cancer, CVD, DM and Stroke           | HSD, HW, HF, L&G                | Health facilities were overburdened and lacked trained staff, and resources to manage NCDs.                                                                               |
| van Dijk-de Vries et al. (2016) (46) | Netherlands | To examine patients' readiness to consult psychosocial problems with nurses   | Mixed-methods; Primary care setting     | 217 diabetic patient participants                             | Survey; Non-validated questionnaire; IDI guide                     | DM                                   | Patients' readiness             | 90% of respondents had positive attitudes towards the existing diabetes consultation.                                                                                     |
| Honey et al. (2016) (28)             | New Zealand | To assess older people's readiness to e-health                                | Quantitative; Urban settings            | 263 patients in primary healthcare centres                    | Survey; Non-validated questionnaire                                | Cancer, CRD, DM, HTN, Mental Illness | HIS                             | 36% of participants sought health information from an online platform.                                                                                                    |
| Adinan et al. (2019) (25)            | Tanzania    | To assess health facilities' readiness to manage DM and HTN                   | Quantitative; Rural and urban districts | 43 health facilities, 62 healthcare workers                   | Survey; Modified WHO SARA questionnaire                            | DM, HTN                              | HSD, HW, HIS, MPK&T             | 86% DM, and 79% HTN services were available.                                                                                                                              |
| Bintabara et al. (2018) (26)         | Tanzania    | To assess health facilities' readiness to manage HTN                          | Quantitative; Countrywide               | 725 healthcare facilities                                     | Survey; Modified WHO SARA questionnaire                            | HTN                                  | HSD                             | 28% of the health facilities had outpatient HTN services.                                                                                                                 |

1  
2

|                                                          |                                 |               |                                                                                                                       |                                        |                                                                        |                                                                          |                                      |                              |                                                                                                                                                                                                                                                   |
|----------------------------------------------------------|---------------------------------|---------------|-----------------------------------------------------------------------------------------------------------------------|----------------------------------------|------------------------------------------------------------------------|--------------------------------------------------------------------------|--------------------------------------|------------------------------|---------------------------------------------------------------------------------------------------------------------------------------------------------------------------------------------------------------------------------------------------|
| 3<br>4<br>5                                              | Peck et al. (2014) (36)         | Tanzania      | To assess NCDs burden and investigate facilities' readiness to manage DM and HTN                                      | Quantitative; Urban and rural settings | 335 healthcare workers                                                 | Modified WHO SARA questionnaire                                          | DM, HTN                              | HSD, MPK&T                   | Most first-line healthcare facilities lacked guidelines, diagnostic equipment, trained staff and effective reporting systems.                                                                                                                     |
| 6<br>7<br>8<br>9<br>10                                   | Aekplakorn et al. (2005) (40)   | Thailand      | To assess primary healthcare providers' readiness to manage CVD along with community members perception and knowledge | Qualitative; Rural district            | 18 CVD patients, 33 community members, 29 health workers/professionals | Semi-structured interview; IDI, KII and FGD guides                       | CVD                                  | HSD, MPK&T                   | Community members lacked minimal knowledge of the symptoms and signs of heart attack or stroke. Healthcare workers had limited skills to manage heart disease, while emergency care hospitals were insufficiently equipped to treat CVD patients. |
| 11<br>12<br>13                                           | Katende et al. (2015) (30)      | Uganda        | To assess the readiness of CD-related services                                                                        | Quantitative; Urban and rural settings | 28 health facilities, 222 health workers                               | Survey; Modified WHO SARA questionnaire                                  | CRD, CVD, DM, Epilepsy, HTN, HIV     | HSD, HW, MPK&T               | Most primary care facilities had inadequate capacity to manage CDs                                                                                                                                                                                |
| 14<br>15<br>16<br>17                                     | Musinguzi et al. (2015) (32)    | Uganda        | To assess health facilities' capacity to manage hypertension                                                          | Quantitative; Two districts            | 126 public & private health facilities, 271 healthcare workers         | Survey; Non-validated questionnaire                                      | HTN                                  | HSD, MPK&T                   | Nearly 93% health facilities managed HTN services and all of them lacked trained staff, guideline, supplies, and diagnostic equipment.                                                                                                            |
| 18<br>19<br>20<br>21                                     | Volk et al. (2015) (37)         | USA           | To examine clinicians' readiness to implement lung cancer screening programmes                                        | Quantitative; Medical attendees        | 350 participants                                                       | Survey; Non-validated questionnaire                                      | Cancer                               | HSD (screening)              | 50% clinicians planned to refer eligible patients for lung cancer screening.                                                                                                                                                                      |
| 22<br>23<br>24<br>25<br>26<br>27                         | Duong et al. (2019) (27)        | Vietnam       | To explore NCD service delivery availability, readiness and utilisation                                               | Quantitative; Rural settings           | 89 community health centres                                            | Survey; Modified WHO SARA questionnaire                                  | DM, Cancer, CRD, HTN, Mental Illness | HSD, HW                      | 25% of the health facilities had NCD services.                                                                                                                                                                                                    |
| 28<br>29<br>30                                           | Kien et al. (2018) (41)         | Vietnam       | To explore responsiveness of commune health stations in urban settings to NCDs                                        | Qualitative; Two districts             | 19 healthcare staff                                                    | Interviews; IDI guide                                                    | NCD focus was not specified          | HSD, HW, HIS, MPK&T, HF, L&G | Healthcare professionals had limited knowledge about the national NCD strategy and lacked NCD-specific training and skills.                                                                                                                       |
| 31<br>32<br>33<br>34<br>35<br>36                         | Meiqari et al. (2020) (44)      | Vietnam       | To describe the delivery and organisation of HTN care in primary healthcare settings                                  | Mixed-methods; Rural and urban setting | 90 healthcare staff, 29 hypertensive patients                          | Survey; Modified WHO SARA questionnaire; Semi-structured interview guide | HTN                                  | HW, MPK&T                    | District-level health facilities had HTN services; however, capacity of facilities across districts to monitor prescription refills and disease for HTN patients varied.                                                                          |
| 37<br>38<br>39<br>40<br>41<br>42<br>43<br>44<br>45<br>46 | Thi Thuy Nga et al. (2017) (45) | Vietnam       | To describe commune health stations' readiness for NCD prevention and control                                         | Mixed-methods; One district            | 20 commune health stations                                             | Survey; Modified WHO SARA questionnaire; IDI and FGD guides              | Cancer, CRD, DM, HTN                 | HSD, HW, HIS, MPK&T, HF, L&G | Commune health stations (CHSs) had limited capacity for NCD screening, diagnosis and treatment services.                                                                                                                                          |
|                                                          | Van Minh et al. (2014) (47)     | Vietnam       | To describe the primary care system's readiness for NCDs                                                              | Mixed-methods; One district            | Health facilities and staff±                                           | Survey; Non-validated questionnaire; Interview; IDI guide                | NCD focus was not specified          | HSD, HW, HIS, MPK&T, HF, L&G | Primary healthcare facilities had limited NCD management capacity and service integration.                                                                                                                                                        |
|                                                          | Mutale et al. (2018) (33)       | Zambia        | To assess the health system's readiness to address NCDs                                                               | Quantitative; Three districts          | 46 primary healthcare facilities                                       | Survey; Modified WHO PEN questionnaire                                   | NCD focus was not specified          | HSD                          | Only the first-level hospitals had a mean readiness index score (=>70%) for managing NCDs.                                                                                                                                                        |
|                                                          | Mendis et al. (2012) (31)       | Multi-country | To evaluate primary care facilities' capacity for the major NCDs                                                      | Quantitative; Multi-country*           | 90 primary healthcare facilities                                       | Survey; Modified WHO PEN questionnaire                                   | Cancer, CRD, CVD, DM                 | HSD, HW, HIS, MPK&T, HF, RS  | Primary care facilities had inadequate financing, basic technologies and medicines, medical information systems and health workforce                                                                                                              |

253

1  
2  
3 254 **Note.** CVDs: Cardiovascular Diseases, DM: Diabetes Mellitus, DHS: Demographic and Health Surveys, FGD: Focus Group Discussion, HTN: Hypertension, IDI: In-depth  
4 255 Interviews, KII: Key Informant Interview, HSD: Health Service Delivery, HW: Health Workforce, HIS: Health Information System, MPK&T: Medical Products, Knowledge and Technologies,  
5 256 HF: Health Financing, CRDs: Chronic Respiratory Diseases, NCD: Non-communicable Disease, WHO: World Health Organization, LMIC: Low- and Middle-Income Countries, L&G:  
6 257 Leadership and Governance, RS: Referral System, WHO SARA: WHO Service Availability and Readiness Assessment, WHO PEN: WHO Package of Essential Non-  
7 258 communicable Disease Interventions

8  
9 259 \*Multi-country includes Benin, Bhutan, Eritrea, Sri Lanka, Sudan, Suriname, Syria and Vietnam

10 260 †The number of participants/sample size was not specified.

11  
12 261 ††National Institute of Population Research and Training  
13  
14  
15  
16  
17  
18  
19  
20  
21  
22  
23  
24  
25  
26  
27  
28  
29  
30  
31  
32  
33  
34  
35  
36  
37  
38  
39  
40  
41  
42  
43  
44  
45  
46



## 262 **Health service delivery**

263 Of the 23 studies, 18 addressed issues related to the health service delivery system's readiness in  
264 preventing and managing NCDs at the primary healthcare level. Eleven of the 18 studies were  
265 quantitative studies, assessing primary healthcare facilities' readiness in implementing the WHO SARA  
266 reference manual (25-27, 29, 30, 36, 38, 45) or WHO PEN interventions (33-35). Three papers adopted  
267 the qualitative approach (40-42), while another three used the mixed-method approach (43, 45, 47).  
268 Four studies focused on a single NCD: DM, CVD (40) or HTN (26, 32). Five papers studied two NCDs  
269 (25, 35, 36, 38, 43), while seven investigated multiple NCDs and risk factors (27, 30, 31, 39, 41, 42,  
270 48). However, two articles did not specify the NCDs that were evaluated (34, 47). Most of the studies  
271 found that healthcare facilities had insufficient capacity to deliver NCD prevention, care and treatment  
272 at the primary level. Among the NCDs, a higher level of readiness at the primary healthcare level was  
273 reported for hypertension prevention and management. The availability of hypertension services at  
274 healthcare facilities was reported to be 92.9% in Uganda (32) and 86% in Tanzania (25); however, one  
275 study found that hypertension preparedness was only 28% in Tanzania's outpatient care (26). A mixed-  
276 methods study in Thailand revealed that commune health stations were significantly prepared to manage  
277 HTN (44). The services readiness for CVD (47.8%), and DM (50%), were reported at the upazila health  
278 complex (UHC) in 2014 in Bangladesh (29, 38). However, the most recent data reported the availability  
279 of services largely varied from community clinic (CC) to 'UHC' for cervical cancer (0.4%-37.5%),  
280 CRD (34.1%-93.9%), CVD (1.4%-69.6%), DM (0.9%-84.5%), and, hypertension (3.5%-91.5%) (39).  
281 In Vietnam, only 25% of commune health centres were equipped to prevent, diagnose and treat major  
282 NCDs, with a noticeably lower utilisation rate of services by the users (27). Capacity for managing DM  
283 was predominantly low across all studies; however, one study in Tanzania (25) found that care for  
284 diabetes mellitus was available in 79% of healthcare facilities. Moreover, a lower level of readiness for  
285 managing CVD was reported across countries (31, 40, 42, 45). Qualitative studies conducted in  
286 Thailand (40) and India (43) noted facilities' low-level preparedness to manage HTN, DM and CVD,  
287 with healthcare facilities/programmes lacking effective community engagements and limited support

1  
2  
3 288 from the national programmes. In Kien et al.'s 2018 study conducted in Vietnam, one of the district-  
4  
5 289 level health staff shared the following:  
6  
7

8 290

9  
10 291 [In our district] we implemented the hypertension programme for only four communes and  
11  
12 292 implemented the diabetes programme for four other communes [among 18 communes]. We do  
13  
14 293 not have any NCD programmes for the rest of the communes (41).  
15  
16

17 294 In a cross-sectional study conducted in Madhya Pradesh, India, the preparedness level for DM and HTN  
18  
19 295 was reported to be slightly high (35). However, inadequate capacity was found for managing the  
20  
21 296 common NCDs in a qualitative study in Odisha and Kerala, India (42). Lower levels of readiness for  
22  
23 297 major NCDs have also been commonly reported in Zambia (33) and Ghana (34).  
24  
25

26 298 Overall, the delivery of NCD services was affected by multiple factors and revealed to be insufficient  
27  
28 299 at the primary healthcare level. Inadequate and ill-equipped healthcare facilities were the most common  
29  
30 300 issues hampering service delivery (25, 27, 31-35, 43). Moreover, notable key barriers include patients'  
31  
32 301 lack of self-management education and knowledge (25), primary-level healthcare professionals' limited  
33  
34 302 NCD management skills and national NCD strategies (25, 41), insufficient NCD service management  
35  
36 303 and implementation capacity of local-level healthcare organisations (26, 47), a weak referral and  
37  
38 304 follow-up system (30, 31), poor adherence to clinical guidelines (25, 30, 32, 36), inadequate screening  
39  
40 305 opportunity (45), lack of information-education-community material (45) and the healthcare facility's  
41  
42 306 rural location.  
43  
44

45 307

### 46 308 **Healthcare workforce**

47  
48  
49  
50  
51 309 Twelve of the studies reviewed reported a healthcare workforce issue related to NCD services and care.  
52  
53 310 According to these papers, a common bottleneck for NCD services is insufficient primary-level  
54  
55 311 healthcare professionals. One cross-sectional study in Tanzania reported only 53% and 15% of  
56  
57 312 healthcare facilities had trained health professionals to manage HTN and DM, respectively (25). In  
58  
59 313 Thailand (40) and Vietnam (45, 47), there was an acute lack of trained healthcare staff to manage CVD.  
60

1  
2  
3 314 Moreover, a study conducted in Uganda found that only 26% and 16% of primary healthcare staff had  
4  
5 315 an adequate level of knowledge to manage DM and HTN outpatients, respectively (30). This study also  
6  
7 316 revealed that medical doctors had a higher level of knowledge (85% for HTN and 8% for DM) than  
8  
9 317 nurses (8% for HTN and 4% for DM) (30). One study in Vietnam reported that only 9% of primary  
10  
11 318 healthcare facilities in rural and urban locations had five categories of human resources (medical doctor,  
12  
13 319 assistant doctor, nurse, midwife and pharmacist) to deliver HTN services (44). The shortage of trained  
14  
15 320 healthcare staff (at least one staff received in-service training in the last 24 months before the data  
16  
17 321 collection date) was reported at the primary healthcare in Bangladesh (39). The trained staff for cervical  
18  
19 322 cancer (29% trained staff at the UHCs, but no trained staff in CCs and union-level facilities), CRD (4%  
20  
21 323 union-level facilities, 11% CCs, and 29% UHCs), CVD (7% union-level facilities, 15% CCs, and 40%,  
22  
23 324 UHCs), DM (3% union-level facilities, 14% CCs, and 28% UHCs), and hypertension (6% union-level  
24  
25 325 facilities, 10% CCs, and 39% UHCs) were reported (39). According to a multi-country study,  
26  
27 326 physicians at primary healthcare facilities were only available in two of the eight participating nations,  
28  
29 327 while nurses and healthcare assistants were the key professionals for NCD services in the remaining six  
30  
31 328 countries (31). A study in Ghana found that more than half of the healthcare centres lacked at least one  
32  
33 329 medical doctor and nurse trained in NCDs (34). In India, while two medical officers were available on  
34  
35 330 average at community health centres to manage DM, CVD, HTN and cancer, this number was lowest  
36  
37 331 (less than half) in primary healthcare centres (35). In qualitative studies conducted in India (42) and  
38  
39 332 Vietnam (41), insufficient healthcare staff jeopardised NCD services in primary care facilities. An NCD  
40  
41 333 programme officer in Odisha, India and a national-level health worker in Vietnam shared their  
42  
43 334 respective thoughts:

44  
45  
46  
47  
48 335 In a big community health centre like ours, there should be more health workforce, and there  
49  
50 336 should be a special training programme for all the health workers (42).

51  
52  
53 337 For the health workforce at commune health stations, some facilities lack human resources  
54  
55 338 and/or capacity. They must be strengthened in their capacity to provide services for NCD  
56  
57 339 prevention, consultation, early detection and management. The reason for this is that we have  
58  
59 340 not implemented NCD services systematically at primary healthcare facilities (41).  
60

341

**342 Health financing**

343 Seven studies found that inadequate funding/budget support from the national healthcare programme  
344 compromised effective NCD service and care at the primary healthcare level. Furthermore, the absence  
345 or limitation of healthcare insurance coverage jeopardised NCD services and care. One study in India  
346 reported that less than 3% of households had insurance coverage (43). A study in Ghana revealed that  
347 healthcare financing is organised by the government as the ‘National Health Insurance Scheme’, and  
348 only those who paid the premium received its benefits (34). Limited public financial/budgetary support  
349 has also been identified as a major barrier to NCD services in primary healthcare in Vietnam (45, 47).  
350 A national-level health worker in Vietnam conveyed the following to Kien et al. in 2018:

351 The budget for NCD primary health care services is extremely limited; [funding is] mainly  
352 through national target programmes on NCDs, but the programmes have been reduced. There  
353 are some barriers to health insurance reimbursement for NCDs at the primary health care level  
354 (41).

355 Similarly, in a qualitative study, a medical officer from Odisha, India shared his observation:

356 Since there is no existing system, funds do not reach the grassroots level. There is no funding  
357 (42).

358

**359 Access to medical products, knowledge and technologies**

360 Across countries and regions, a lack of supply-side factors, such as medical products and knowledge  
361 and technologies to prevent and manage NCDs, has been widely reported. Fifteen studies reported  
362 inadequate or interrupted access to supplies and technologies at the primary healthcare level, which are  
363 vital for diagnosing and treating NCDs. In Bangladesh, the availability of medicine widely varied at the  
364 UHCs based on their types for DM (metformin 38.1%, glibenclamide 7.4%), CRD (salbutamol 91.6%,  
365 epinephrine 0.3%), CVD (amiodipine/nifedipine 41.5%, aspirin 2.6%), and HTN

1  
2  
3 366 (amlodipine/nifedipine 44.7%, thiazide 1.4%), but no supply in the CCs were reported (39). In India,  
4  
5 367 the essential drugs for the management of HTN (beta-blockers and calcium channel blockers) were  
6  
7 368 available at most of the primary health centres (PHCs) and community health centres; however, other  
8  
9 369 drugs (except metformin) were largely unavailable across facilities that resulted in 90% of NCD patients  
10  
11 370 in India to rely on private providers/facilities for NCD service and care (35). More than 60% of PHC-  
12  
13 371 level facilities faced a shortage of essential DM medicine, with over 30% of PHCs having a medicine  
14  
15 372 stockout of more than six months. Only 38% of PHCs had functional laboratory facilities (43).  
16  
17 373 According to a study conducted in Tanzania, 50% of health centres, 24% of dispensaries and 80% of  
18  
19 374 hospitals had HTN and DM medicines on hand; however, more than one-third of these locations lacked  
20  
21 375 basic laboratory facilities (25). A qualitative study in Vietnam (41) and a qualitative multi-country  
22  
23 376 investigation (Benin, Bhutan, Eritrea, Sri Lanka, Sudan, Suriname, Syria and Vietnam) (31) likewise  
24  
25 377 reported the shortage of medicine and basic diagnostic facilities at primary healthcare facilities.  
26  
27 378 Moreover, basic amenities and equipment for NCDs were in short supply in Ugandan healthcare  
28  
29 379 facilities (hospitals and healthcare centres), with more than half of them lacking the recommended  
30  
31 380 antihypertensive drug and nearly 30% lacking a blood pressure device (32). Likewise, Tanzanian  
32  
33 381 healthcare facilities reported a shortage of the recommended medicine and supplies required for HTN  
34  
35 382 and DM service and care (36). Similarly, a mixed-method study found a scarcity of medical products  
36  
37 383 and equipment for CRD, DM, cancer and HTN in Vietnam (45). However, basic equipment and  
38  
39 384 diagnostic facilities such as stethoscope (93.2% CCs, 96.9% UHCs), blood pressure apparatus (85.6%  
40  
41 385 CCs, 95.4% UHCs), adult scale (90.9% CCs, 82.9% UHCs), blood glucose testing (22.2% CCs, 48.9%  
42  
43 386 UHCs), urine protein (0% CCs, 36.2 % UHCs), and urine glucose (0% CCs, 30.4 % UHCs) were  
44  
45 387 available in Bangladesh (39).  
46  
47  
48  
49

388

### 389 **Health information system**

390 Studies that assessed the health information system's readiness were limited. Only five papers addressed  
391 the health information system required for optimising NCD care at the primary healthcare level (25, 31,  
392 41, 45, 47). These studies extensively reported on weak health information systems for detecting,

1  
2  
3 393 treating and monitoring NCD patients in primary healthcare settings. Furthermore, only 52.9% of  
4  
5 394 primary healthcare facilities in Tanzania were prepared to collect, analyse and use local-level data for  
6  
7 395 HTN and DM services (25). According to a multi-country survey, 85% of healthcare facilities created  
8  
9 396 paper-based (patient register) individual-level information for patients who attended the facilities, but  
10  
11 397 only half of that information was used at the follow-up visit (31). Weak and ineffective health  
12  
13 398 information system management and inadequate NCD information, such as a lack of population-based  
14  
15 399 NCD-related data on risk factors, mortality, disability and referral systems at the primary healthcare  
16  
17 400 level, have been identified as crucial barriers to managing NCDs in Vietnam (41, 45).  
18  
19  
20  
21 401  
22

### 23 402 **Leadership and governance**

24  
25  
26 403 Four studies investigated issues of leadership and stewardship in the management of NCDs in primary  
27  
28 404 healthcare (41, 42, 45, 47). The research reported a lack of coordination among stakeholders and  
29  
30 405 departments in implementing nationally designed NCD programmes/interventions. A qualitative study  
31  
32 406 in India discovered weak inter-departmental coordination between various government departments  
33  
34 407 (e.g. mental health programme and tobacco control programme), which resulted in poor NCD outcomes  
35  
36 408 at the primary care level (42). The primary care-level NCD managers lacked knowledge of Vietnam's  
37  
38 409 national NCD strategy or policies affecting targeted interventions for cancer, CVDs and diabetes (41).  
39  
40 410 Limited knowledge of NCD management strategy and insufficient leadership capacity were highlighted  
41  
42 411 among front-line healthcare staff (41). Furthermore, a lack of interaction between private and public  
43  
44 412 providers and stakeholders was reported for NCD prevention/management activities in Vietnam (45).  
45  
46 413 A mixed-method study found that Vietnam's nationally targeted NCD management and control  
47  
48 414 programme lacked leadership and governance capacity (47).  
49  
50  
51  
52 415  
53

### 54 416 **Community perspective**

55  
56  
57 417 Only two studies, conducted in the Netherlands and New Zealand, explored community perspectives  
58  
59 418 on patients' capacity for using healthcare information, self-management and sharing problems when  
60

1  
2  
3 419 seeking aid to manage NCDs at the primary healthcare level. A mixed-method study in the Netherlands  
4  
5 420 (46) showed that, during a consultation, people with diabetes had a low-level ability to share  
6  
7 421 psychological issues with healthcare providers at the primary healthcare level. In New Zealand, the  
8  
9 422 readiness of patients with NCDs (cancer, chronic pain, diabetes and mental health problems) was low,  
10  
11 423 with only 36% of them seeking health-related information from digitalised sources (28). This demand-  
12  
13 424 side perspective was not addressed in studies from low- and middle-income countries.  
14  
15

16 425

### 19 426 **Quality of included studies / Quality assessment**

21 427 Nearly three-fifth (61%) of the studies were of good quality (MMAT score of 75) (Table 1): one paper  
22  
23 428 (4%) had an MMAT score of 25 (low quality), eight (35%) scored 50 (medium quality), eleven (48%)  
24  
25 429 received 75 (good quality) and three (13%) reached 100 (high quality). No study had an MMAT score  
26  
27 430 of 0 (poor quality).  
28  
29

30 431

31 432

### 36 433 **Discussion**

37  
38 434 This review appraised available evidence on health system readiness for NCDs at the primary healthcare  
39  
40 435 level. The key findings of this study were that health systems at the primary healthcare level were  
41  
42 436 inadequately prepared for NCD prevention and management, and that readiness was poorly understood.  
43  
44 437 Health system readiness was examined from the providers' perspectives, which is specifically focused  
45  
46 438 on the availability of infrastructures and supply of resources (e.g. medicine, basic amenities, medical  
47  
48 439 products and technologies) as devised in the WHO SARA methodology or WHO PEN interventions.  
49  
50 440 This may have narrowed the 'systems thinking' approach, which is a core philosophical basis that  
51  
52 441 incorporates various elements and their interactions and interconnectedness to function as a system (19).  
53  
54 442 Viewing the health system from this constricted sense categorically failed to include people's (service  
55  
56 443 users') dimensions, which is an essential consideration for a well-functioning and inclusive health  
57  
58 444 system. One plausible reason for predominantly analysing the health system from the supply-side  
59  
60

1  
2  
3 445 perspective was the widespread acceptance of the WHO health system framework and its broader  
4  
5 446 applications in individual studies. Over the past years, the ‘building block’ approach appeared as a  
6  
7 447 dominant health system method globally (49), supporting the existing trend of assessing the health  
8  
9 448 system from the supply-side perspective. Thus, the demand-side perspectives of health system readiness  
10  
11 449 for NCDs warrant extensive investigation. Future research may focus on the demand-side aspects of the  
12  
13 450 health system’s readiness, such as community characteristics and associated determinants needed to  
14  
15 451 establish an effective and inclusive health system to respond to the NCD epidemic.  
16  
17  
18  
19  
20

21 452  
22  
23 453 This review demonstrated that almost all countries’ primary healthcare systems have suffered from  
24  
25 454 inadequate supply-side responses to medicine, technologies, equipment, amenities, trained healthcare  
26  
27 455 professionals, health information and leadership and stewardship. The ill-equipped health system may  
28  
29 456 result from insufficient financing mobilised through international and domestic channels and a lack of  
30  
31 457 policy priority in responding to NCDs (50-52). Among the NCDs addressed by the studies in this  
32  
33 458 review, DM and HTN received the most attention in the current literature. Hence, other major NCDs  
34  
35 459 such as CVD, CRD and cancer, which are prioritised by the WHO, remain largely under-researched.  
36  
37 460 The focus on DM and HTN may be due to multiple factors, including increasing prevalence and  
38  
39 461 associated determinants/risk factors for other NCDs in low- and middle-income countries, a nationwide  
40  
41 462 vertical programme, individual-level professional capacity and greater resource mobilisation (53-55),  
42  
43 463 all of which have facilitated DM and HTN care, management and research. Moreover, the integrated  
44  
45 464 model for DM and HTN care has widely been considered in the low-and middle-income countries that  
46  
47 465 accelerated the provision of effective and equitable health service delivery at the primary healthcare  
48  
49 466 level, which would have helped to address the rising burden of them with accessible, equitable, and  
50  
51 467 cost-effective interventions (56-58). This review revealed that at the primary healthcare level, health  
52  
53 468 system readiness for major NCDs was primarily concentrated on the diagnosis and treatment aspects.  
54  
55 469 However, readiness for health promotion and preventive interventions, provision of palliative care,  
56  
57 470 screening, identification of risk factors, self-management and health education have remained under-  
58  
59 471 investigated and of less priority (59, 60). As such, primary and secondary prevention of NCDs was  
60



1  
2  
3 472 emphasised in the WHO's NCD prevention and control strategy in 2011 (61) and has been highlighted  
4  
5 473 in the current literature to reduce NCD-related morbidities and deaths (62-64). Preventive and health  
6  
7 474 promotional activities on key NCD risk factors, (61, 65) such as tobacco consumption, salt intake,  
8  
9 475 physical inactivity, harmful alcohol use and unhealthy diet, stress that these can be addressed at the  
10  
11 476 primary healthcare level to improve NCD outcome. The potential for a well-prepared health system is  
12  
13 477 realised when promotional and preventive services are adequately provided at the primary healthcare  
14  
15 478 level (66, 67). Lack of a comprehensive prevention and management approach led us to hypothesise  
16  
17 479 that the full potential of the health system's response to NCDs may have been hindered at the primary  
18  
19 480 healthcare level. Majority of the studies in this review had good or high quality. However, a large  
20  
21 481 proportion of the study reflected inexplicit evidence due to the methodology, small sample size, bias,  
22  
23 482 and incomplete information. A few quantitative studies lacked sufficient details about the participants'  
24  
25 483 selection criteria, standard criteria for minimizing bias, and use of non-validated questionnaires with a  
26  
27 484 relatively small sample size that might affect the scope of generalizability of the findings (27, 29, 32,  
28  
29 485 34, 35). One mixed-method study was rated low quality due to the homogeneous sample and insufficient  
30  
31 486 information about the data analysis (47). The rest of the mixed-method studies included in the review  
32  
33 487 had a more representative sample size and methodological rigors. The majority of the included studies  
34  
35 488 used the WHO's health system framework as an analytical basis to identify the health system  
36  
37 489 components. However, some studies lacked a deeper analysis of the interplay and interconnectedness  
38  
39 490 between different health system components. Despite these limitations, this study provides important  
40  
41 491 information regarding current evidence on the readiness of the primary healthcare system for NCDs.  
42  
43 492 Additionally, most of the selected studies in this review were conducted in resource-poor settings,  
44  
45 493 primarily in sub-Saharan African and South East Asian countries. The smaller number of studies in  
46  
47 494 developed countries may be explained by their adoption of a specialised disease management strategy,  
48  
49 495 which lessens the focus on comprehensive management of NCDs at the primary healthcare level (68).  
50  
51 496 An extensive investigation of community characteristics and associated factors may be necessary for  
52  
53 497 establishing a well-functioning and more responsive health system to respond to NCDs (24).  
54  
55  
56  
57  
58  
59  
60

## 498 **Strengths and limitations**

1  
2  
3 499 This review's main strength was an inclusive data synthesis informed by the health system dynamics  
4  
5 500 framework, which offers a deeper and more comprehensive (both supply-side and demand-side factors)  
6  
7 501 understanding of primary healthcare system readiness for NCDs. Conducting An extensive systematic  
8  
9 502 search of literature with hand-searching references and expert advice increased the validity and  
10  
11 503 trustworthiness of this review's findings. On the other hand, one of its limitations was that a few studies  
12  
13 504 that reported health system readiness at combined primary and secondary healthcare levels were  
14  
15 505 excluded. Moreover, the selected studies had heterogeneous study designs, methods and techniques,  
16  
17 506 and focused on a variety of health system components, preventing meta-analysis. Another limitation  
18  
19 507 was that studies containing relevant information published in languages other than English have been  
20  
21 508 excepted, which may have influenced the results of this review.  
22  
23  
24  
25  
26

## 27 510 **Conclusion and future direction**

28  
29  
30 511 This review demonstrated that health systems at the primary healthcare level are insufficiently prepared  
31  
32 512 for NCD prevention and management, especially for CVD, CRD and cancer. The existing health system  
33  
34 513 response was characterised by insufficient 'supply-side' factors (i.e. supply of medicine, equipment and  
35  
36 514 technology), a lack of appropriate NCD management strategies and guidelines, a weak health  
37  
38 515 information system, limited resources, uncoordinated local-level stewardship and leadership and a  
39  
40 516 shortage of human resources. One of the notable findings was that the primary healthcare system's  
41  
42 517 readiness over the years was evaluated from the 'supply-side' perspective; hence, there is a significant  
43  
44 518 knowledge gap in the literature from the 'demand-side' standpoint. This observation may be useful for  
45  
46 519 future research into users' views on NCD management at the primary healthcare level, including NCD  
47  
48 520 management practice, knowledge, attitude, care-seeking behaviour, adherence to treatment, self-  
49  
50 521 management and coping strategies.  
51  
52  
53  
54  
55  
56  
57  
58  
59  
60

1  
2  
3 525  
4  
56 526 **Author Contributions**  
7

8  
9 527 AK, NK and BB created the manuscript. AK and LR led the literature search. AK, NK, RI and BB  
10 528 screened the literature and completed the mapping. AK led the drafting process, while NK, RI and BB  
11  
12 529 provided substantial input. All authors read and approved the final manuscript.  
13  
14

15 530  
1617  
18 531 **Funding**  
19

20  
21 532 This project received no external funding.  
22  
23

24 533  
2526 534 **Data availability statement**  
27

28  
29 535 No additional data are available.  
30  
31

32 536  
3334 537 **Competing interest**  
35

36  
37 538 The authors declare that they have no competing interests.  
38  
39

40 539  
41  
42  
43  
44  
45  
46  
47  
48  
49  
50  
51  
52  
53  
54  
55  
56  
57  
58  
59  
60

540 **References**

- 541 1. World Health Organization. Noncommunicable diseases: Key facts 2021 [Available from:  
542 <https://www.who.int/news-room/fact-sheets/detail/noncommunicable-diseases>.  
543
- 544 2. Marrero SL, Bloom DE, Adashi EY. Noncommunicable diseases: a global health crisis in a new  
545 world order. *Jama*. 2012;307(19):2037-8.
- 546 3. Beaglehole R, Epping-Jordan J, Patel V, Chopra M, Ebrahim S, Kidd M, et al. Improving the  
547 prevention and management of chronic disease in low-income and middle-income countries: a  
548 priority for primary health care. *Lancet*. 2008;372(9642):940-9.
- 549 4. Capizzi S, De Waure C, Boccia S. Global burden and health trends of non-communicable  
550 diseases. *A systematic review of key issues in public health*: Springer; 2015. p. 19-32.
- 551 5. Bloom DE, Cafiero E, Jané-Llopis E, Abrahams-Gessel S, Bloom LR, Fathima S, et al. The global  
552 economic burden of noncommunicable diseases. *Program on the Global Demography of Aging*;  
553 2012.
- 554 6. Assembly UG. High Level Meeting on Prevention and Control of Non-Communicable  
555 Diseases: Political Declaration of the High-Level Meeting of the General Assembly on the Prevention  
556 and Control of Non-Communicable Diseases. DocumentA/66/L. 1. New York, NY: United Nations  
557 General Assembly, 2011. 2016.
- 558 7. World Health Organization. Global action plan for the prevention and control of  
559 noncommunicable diseases 2013-2020. 2013.
- 560 8. World Health Organization. World health statistics 2016: monitoring health for the SDGs  
561 sustainable development goals: World Health Organization; 2016.
- 562 9. NCD Countdown 2030: pathways to achieving Sustainable Development Goal target 3.4.  
563 *Lancet*. 2020.
- 564 10. Dodd R, Palagyi A, Jan S, Abdel-All M, Nambiar D, Madhira P, et al. Organisation of primary  
565 health care systems in low- and middle-income countries: review of evidence on what works and  
566 why in the Asia-Pacific region. *BMJ Glob Health*. 2019;4(Suppl 8):e001487.
- 567 11. Rohde J, Cousens S, Chopra M, Tangcharoensathien V, Black R, Bhutta ZA, et al. 30 years  
568 after Alma-Ata: has primary health care worked in countries? *Lancet*. 2008;372(9642):950-61.
- 569 12. Organization WH. Primary health care: report of the International Conference on primary  
570 health care, Alma-Ata, USSR, 6-12 September 1978: World Health Organization; 1978.
- 571 13. Alvarez FN, Leys M, Mérida HE, Guzmán GE. Primary health care research in Bolivia:  
572 systematic review and analysis. *Health Policy Plan*. 2016;31(1):114-28.
- 573 14. Bitton A, Ratcliffe HL, Veillard JH, Kress DH, Barkley S, Kimball M, et al. Primary Health Care  
574 as a Foundation for Strengthening Health Systems in Low- and Middle-Income Countries. *J Gen  
575 Intern Med*. 2017;32(5):566-71.
- 576 15. Dineen-Griffin S, Garcia-Cardenas V, Williams K, Benrimoj SI. Helping patients help  
577 themselves: A systematic review of self-management support strategies in primary health care  
578 practice. *PLoS One*. 2019;14(8):e0220116.
- 579 16. Albelbeisi AH, Albelbeisi A, El Bilbeisi AH, Taleb M, Takian A, Akbari-Sari A. Public Sector  
580 Capacity to Prevent and Control of Noncommunicable Diseases in Twelve Low- and Middle-Income  
581 Countries Based on WHO-PEN Standards: A Systematic Review. *Health Serv Insights*.  
582 2021;14:1178632920986233.
- 583 17. Kabir A, Karim MN, Billah B. Primary healthcare system readiness to prevent and manage  
584 non-communicable diseases in Bangladesh: a mixed-method study protocol. *BMJ Open*.  
585 2021;11(9):e051961.
- 586 18. Organization WH. Everybody's business--strengthening health systems to improve health  
587 outcomes: WHO's framework for action. 2007.
- 588 19. Criel Bart. ON, Pirad M., Van der Venet J.,. *Basic Concepts in Public Health*. Antwerp:  
589 Institute of Tropical Medicine; 2013.

- 1  
2  
3 590 20. Mounier-Jack S, Griffiths UK, Closser S, Burchett H, Marchal B. Measuring the health systems  
4 591 impact of disease control programmes: a critical reflection on the WHO building blocks framework.  
5 592 BMC Public Health. 2014;14:278.
- 6 593 21. Van Olmen J, Criel B, Van Damme W, Marchal B, Van Belle S, Van Dormael M, et al. Analysing  
7 594 health systems dynamics. A framework. *Studies in Health Services Organisation & Policy*. 2012;28(2).  
8 595 22. Moher D, Liberati A, Tetzlaff J, Altman DG. Preferred reporting items for systematic reviews  
9 596 and meta-analyses: the PRISMA statement. *PLoS medicine*. 2009;6(7):e1000097.
- 10 597 23. Hong QN, Pluye P, Fàbregues S, Bartlett G, Boardman F, Cargo M, et al. Mixed methods  
11 598 appraisal tool (MMAT), version 2018. Registration of copyright. 2018;1148552:10.
- 12 599 24. Olmen JV, Criel B, Bhojani U, Marchal B, Belle SV, Chenge MF, et al. The Health System  
13 600 Dynamics Framework: The introduction of an analytical model for health system analysis and its  
14 601 application to two case-studies. *Health, Culture and Society*. 2012;2(1):1-21.
- 15 602 25. Adinan J, Manongi R, Temu GA, Kapologwe N, Marandu A, Wajanga B, et al. Preparedness of  
16 603 health facilities in managing hypertension & diabetes mellitus in Kilimanjaro, Tanzania: a cross  
17 604 sectional study. *BMC Health Services Research*. 2019;19(1):537.
- 18 605 26. Bintabara D, Mpondo BCT. Preparedness of lower-level health facilities and the associated  
19 606 factors for the outpatient primary care of hypertension: Evidence from Tanzanian national survey.  
20 607 *PLoS One*. 2018;13(2):e0192942.
- 21 608 27. Duong DB, Minh HV, Ngo LH, Ellner AL. Readiness, Availability and Utilization of Rural  
22 609 Vietnamese Health Facilities for Community Based Primary Care of Non-communicable Diseases: A  
23 610 CrossSectional Survey of 3 Provinces in Northern Vietnam. *International Journal of Health Policy &  
24 611 Management*.8(3):150-7.
- 25 612 28. Honey M, Waterworth S, Aung H. Older Consumers' Readiness for e-Health in New Zealand.  
26 613 *Studies in Health Technology & Informatics*.225:178-82.
- 27 614 29. Islam MR, Laskar SP, Macer D. A Study on Service Availability and Readiness Assessment of  
28 615 Non-Communicable Diseases Using the WHO Tool for Gazipur District in Bangladesh. *Bangladesh  
29 616 Journal of Bioethics*. 2016;7(2):1-13.
- 30 617 30. Katende D, Mutungi G, Baisley K, Biraro S, Ikoona E, Peck R, et al. Readiness of Ugandan  
31 618 health services for the management of outpatients with chronic diseases. *Tropical Medicine &  
32 619 International Health*.20(10):1385-95.
- 33 620 31. Mendis S, Al Bashir I, Dissanayake L, Varghese C, Fadhil I, Marhe E, et al. Gaps in capacity in  
34 621 primary care in low-resource settings for implementation of essential noncommunicable disease  
35 622 interventions. *International Journal of Hypertension*. 2012;2012:584041.
- 36 623 32. Musinguzi G, Bastiaens H, Wanyenze RK, Mukose A, Van Geertruyden JP, Nuwaha F. Capacity  
37 624 of Health Facilities to Manage Hypertension in Mukono and Buikwe Districts in Uganda: Challenges  
38 625 and Recommendations. *PLoS ONE [Electronic Resource]*.10(11):e0142312.
- 39 626 33. Mutale W, Bosomprah S, Shankalala P, Mweemba O, Chilengi R, Kapambwe S, et al.  
40 627 Assessing capacity and readiness to manage NCDs in primary care setting: Gaps and opportunities  
41 628 based on adapted WHO PEN tool in Zambia. *PLoS ONE [Electronic Resource]*.13(8):e0200994.
- 42 629 34. Nyarko KM, Ameme DK, Ocansey D, Commeh E, Markwei MT, Ohene SA. Capacity  
43 630 assessment of selected health care facilities for the pilot implementation of Package for Essential  
44 631 Non-communicable Diseases (PEN) intervention in Ghana. *The Pan African medical journal*.25(Suppl  
45 632 1):16.
- 46 633 35. Pakhare A, Kumar S, Goyal S, Joshi R. Assessment of primary care facilities for cardiovascular  
47 634 disease preparedness in Madhya Pradesh, India. *BMC Health Services Research*. 2015;15:408.
- 48 635 36. Peck R, Mghamba J, Vanobberghen F, Kavishe B, Rugarabamu V, Smeeth L, et al.  
49 636 Preparedness of Tanzanian health facilities for outpatient primary care of hypertension and  
50 637 diabetes: a cross-sectional survey. *The Lancet Global Health*. 2014;2(5):e285-92.
- 51 638 37. Volk RJ, Foxhall LE. Readiness of primary care clinicians to implement lung cancer screening  
52 639 programs. *Preventive Medicine Reports*. 2015;2:717-9.

- 1  
2  
3 640 38. Biswas T, Haider MM, Das Gupta R, Uddin J. Assessing the readiness of health facilities for  
4 641 diabetes and cardiovascular services in Bangladesh: a cross-sectional survey. *BMJ*  
5 642 *Open*.8(10):e022817.  
6 643 39. National Institute of Population Research and Training. Bangladesh Health Facility Survey:  
7 644 2017. 2020.  
8 645 40. Aekplakorn W, Suriyawongpaisal P, Sirirassamee B. Assessment of capacity for  
9 646 cardiovascular disease control and prevention in Thailand: a qualitative study. *Southeast Asian*  
10 647 *Journal of Tropical Medicine & Public Health*.36(3):741-7.  
11 648 41. Kien VD, Van Minh H, Giang KB, Ng N, Nguyen V, Tuan LT, et al. Views by health professionals  
12 649 on the responsiveness of commune health stations regarding non-communicable diseases in urban  
13 650 Hanoi, Vietnam: a qualitative study. *BMC Health Serv Res*. 2018;18(1):392.  
14 651 42. Panda R, Mahapatra S, Persai D. Health system preparedness in noncommunicable diseases:  
15 652 Findings from two states Odisha and Kerala in India. *J Family Med Prim Care*. 2018;7(3):565-70.  
16 653 43. Elias MA, Pati MK, Aivalli P, Srinath B, Munegowda C, Shroff ZC, et al. Preparedness for  
17 654 delivering non-communicable disease services in primary care: access to medicines for diabetes and  
18 655 hypertension in a district in south India. *BMJ Glob Health*. 2017;2(Suppl 3):e000519.  
19 656 44. Meiqari L, Nguyen T-P-L, Essink D, Wright P, Scheele F. Strengthening human and physical  
20 657 infrastructure of primary healthcare settings to deliver hypertension care in Vietnam: a mixed-  
21 658 methods comparison of two provinces. *Health policy and planning*. 2020;35(8):918-30.  
22 659 45. Thi Thuy Nga N, Thi My Anh B, Nguyen Ngoc N, Minh Diem D, Duy Kien V, Bich Phuong T, et  
23 660 al. Capacity of Commune Health Stations in Chi Linh District, Hai Duong Province, for Prevention and  
24 661 Control of Noncommunicable Diseases. *Asia-Pacific Journal of Public Health*.29(5\_suppl):94S-101S.  
25 662 46. van Dijk-de Vries A, van Bokhoven MA, de Jong S, Metsemakers JF, Verhaak PF, van der  
26 663 Weijden T, et al. Patients' readiness to receive psychosocial care during nurse-led routine diabetes  
27 664 consultations in primary care: A mixed methods study. *International Journal of Nursing*  
28 665 *Studies*.63:58-64.  
29 666 47. Van Minh H, Do YK, Bautista MA, Tuan Anh T. Describing the primary care system capacity  
30 667 for the prevention and management of non-communicable diseases in rural Vietnam. *International*  
31 668 *Journal of Health Planning & Management*.29(2):e159-73.  
32 669 48. Bawazir AA, Al-Surimi K, Suwaidan SD, AlShehri AM, AlFarhan AI, Aboufotouh MA. Capacity  
33 670 and readiness of primary health care centers for implementation of the basic strategy for prevention  
34 671 and control of non-communicable diseases in Saudi Arabia. A case study from the Ministry of  
35 672 National Guard-Health Affairs, Riyadh, Saudi Arabia. *Saudi Medical Journal*.40(6):614-8.  
36 673 49. Sacks E, Morrow M, Story WT, Shelley KD, Shanklin D, Rahimtoola M, et al. Beyond the  
37 674 building blocks: integrating community roles into health systems frameworks to achieve health for  
38 675 all. *BMJ Glob Health*. 2018;3(Suppl 3):e001384.  
39 676 50. Allen LN. Financing national non-communicable disease responses. *Glob Health Action*.  
40 677 2017;10(1):1326687.  
41 678 51. Mendis S. The policy agenda for prevention and control of non-communicable diseases. *Br*  
42 679 *Med Bull*. 2010;96:23-43.  
43 680 52. Robinson HM, Hort K. Non-communicable diseases and health systems reform in low-and-  
44 681 middle-income countries. *Pac Health Dialog*. 2012;18(1):179-90.  
45 682 53. Fonseca VA, Kirkman MS, Darsow T, Ratner RE. The American Diabetes Association diabetes  
46 683 research perspective. *Diabetes Care*. 2012;35(6):1380-7.  
47 684 54. Lastra G, Syed S, Kurukulasuriya LR, Manrique C, Sowers JR. Type 2 diabetes mellitus and  
48 685 hypertension: an update. *Endocrinol Metab Clin North Am*. 2014;43(1):103-22.  
49 686 55. Malekzadeh A, Michels K, Wolfman C, Anand N, Sturke R. Strengthening research capacity in  
50 687 LMICs to address the global NCD burden. *Glob Health Action*. 2020;13(1):1846904.  
51 688 56. Shigayeva A, Atun R, McKee M, Coker R. Health systems, communicable diseases and  
52 689 integration. *Health Policy and Planning*. 2010;25(suppl\_1):i4-i20.  
53  
54  
55  
56  
57  
58  
59  
60

- 1  
2  
3 690 57. Nigatu T. Integration of HIV and noncommunicable diseases in health care delivery in low-  
4 691 and middle-income countries. *Preventing chronic disease*. 2012;9.  
5 692 58. Esterson Y, Carey M, Piette J, Thomas N, Hawkins M. A Systematic Review of Innovative  
6 693 Diabetes Care Models in Low-and Middle-Income Countries (LMICs). *Journal of health care for the*  
7 694 *poor and underserved*. 2014;25:72-93.  
8 695 59. Gillam S. Is the declaration of Alma Ata still relevant to primary health care? *Bmj*.  
9 696 2008;336(7643):536-8.  
10 697 60. Maciocco G. Alma Ata 30 years on. Evolution and perspectives of primary health care. *Ann*  
11 698 *lg*. 2008;20(4):389-99.  
12 699 61. Mamudu HM, Yang JS, Novotny TE. UN resolution on the prevention and control of non-  
13 700 communicable diseases: an opportunity for global action. *Global public health*. 2011;6(4):347-53.  
14 701 62. Ezzati M, Obermeyer Z, Tzoulaki I, Mayosi BM, Elliott P, Leon DA. Contributions of risk  
15 702 factors and medical care to cardiovascular mortality trends. *Nat Rev Cardiol*. 2015;12(9):508-30.  
16 703 63. Kontis V, Bennett JE, Mathers CD, Li G, Foreman K, Ezzati M. Future life expectancy in 35  
17 704 industrialised countries: projections with a Bayesian model ensemble. *Lancet*.  
18 705 2017;389(10076):1323-35.  
19 706 64. Lloyd-Sherlock PG, Ebrahim S, McKee M, Prince MJ. Institutional ageism in global health  
20 707 policy. *Bmj*. 2016;354:i4514.  
21 708 65. World Health Organization. A global review of primary health care: emerging messages:  
22 709 global report. 2003.  
23 710 66. Jeet G, Thakur JS, Prinja S, Singh M. Community health workers for non-communicable  
24 711 diseases prevention and control in developing countries: Evidence and implications. *PLoS One*.  
25 712 2017;12(7):e0180640.  
26 713 67. World Health Organization. Preventing noncommunicable diseases [Available from:  
27 714 <https://www.who.int/activities/preventing-noncommunicable-diseases>.  
28 715 68. Van Lerberghe W. The world health report 2008: primary health care: now more than ever:  
29 716 World Health Organization; 2008.

717

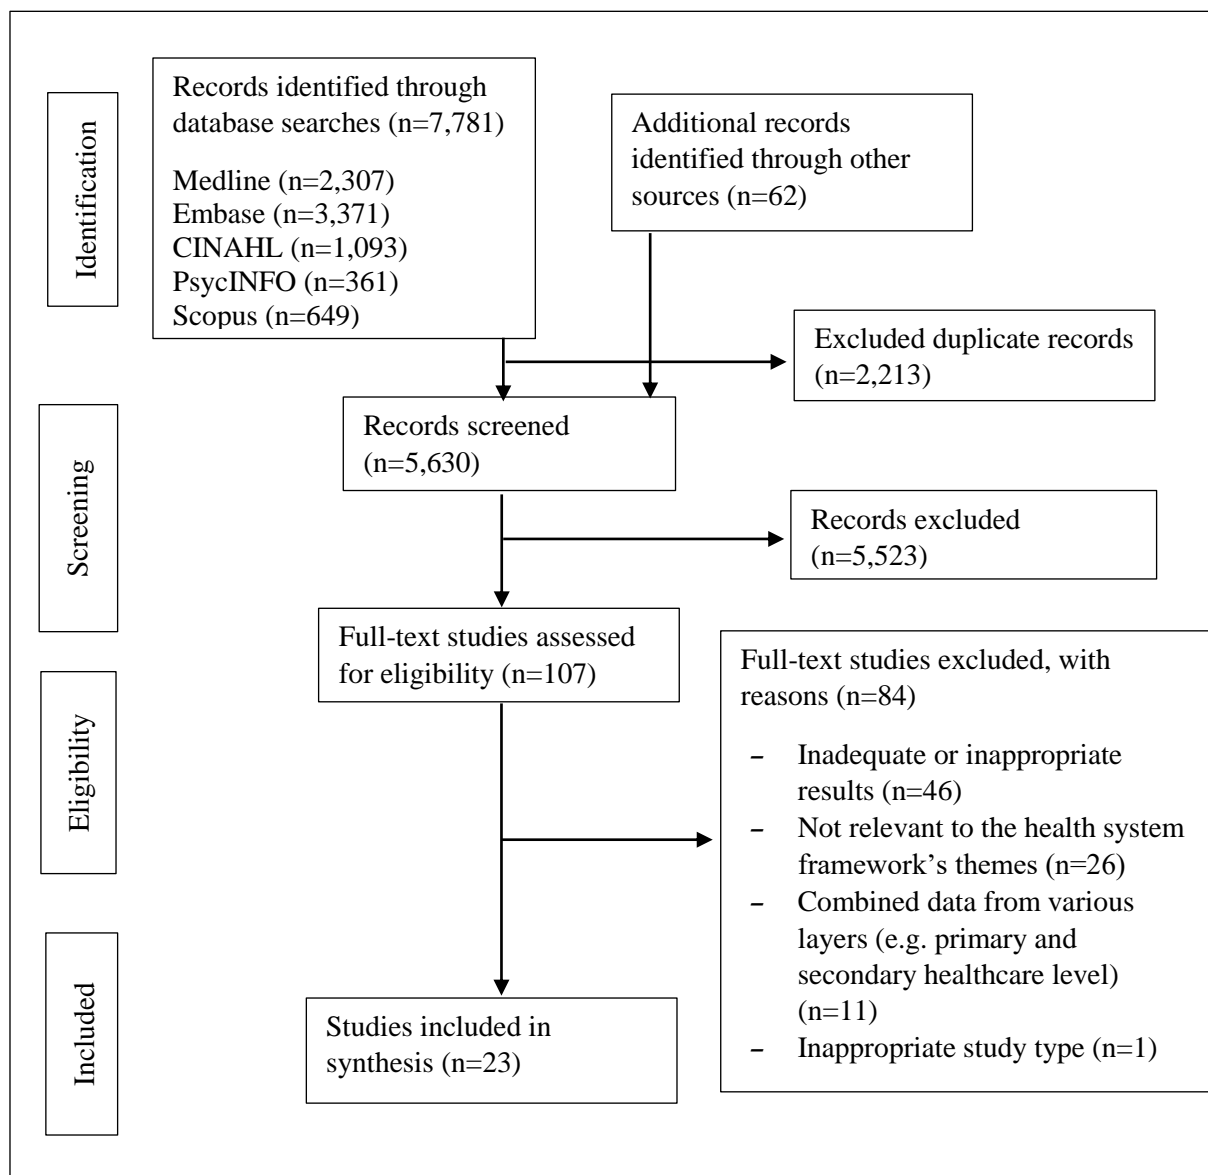

Figure 1 PRISMA flowchart for study inclusion.



1  
2  
3  
4  
5  
6  
7  
8  
9  
10  
11  
12  
13  
14  
15  
16  
17  
18  
19  
20  
21  
22  
23  
24  
25  
26  
27  
28  
29  
30  
31  
32  
33  
34  
35  
36  
37  
38  
39  
40  
41  
42  
43  
44  
45  
46  
47  
48  
49  
50  
51  
52  
53  
54  
55  
56  
57  
58  
59

a

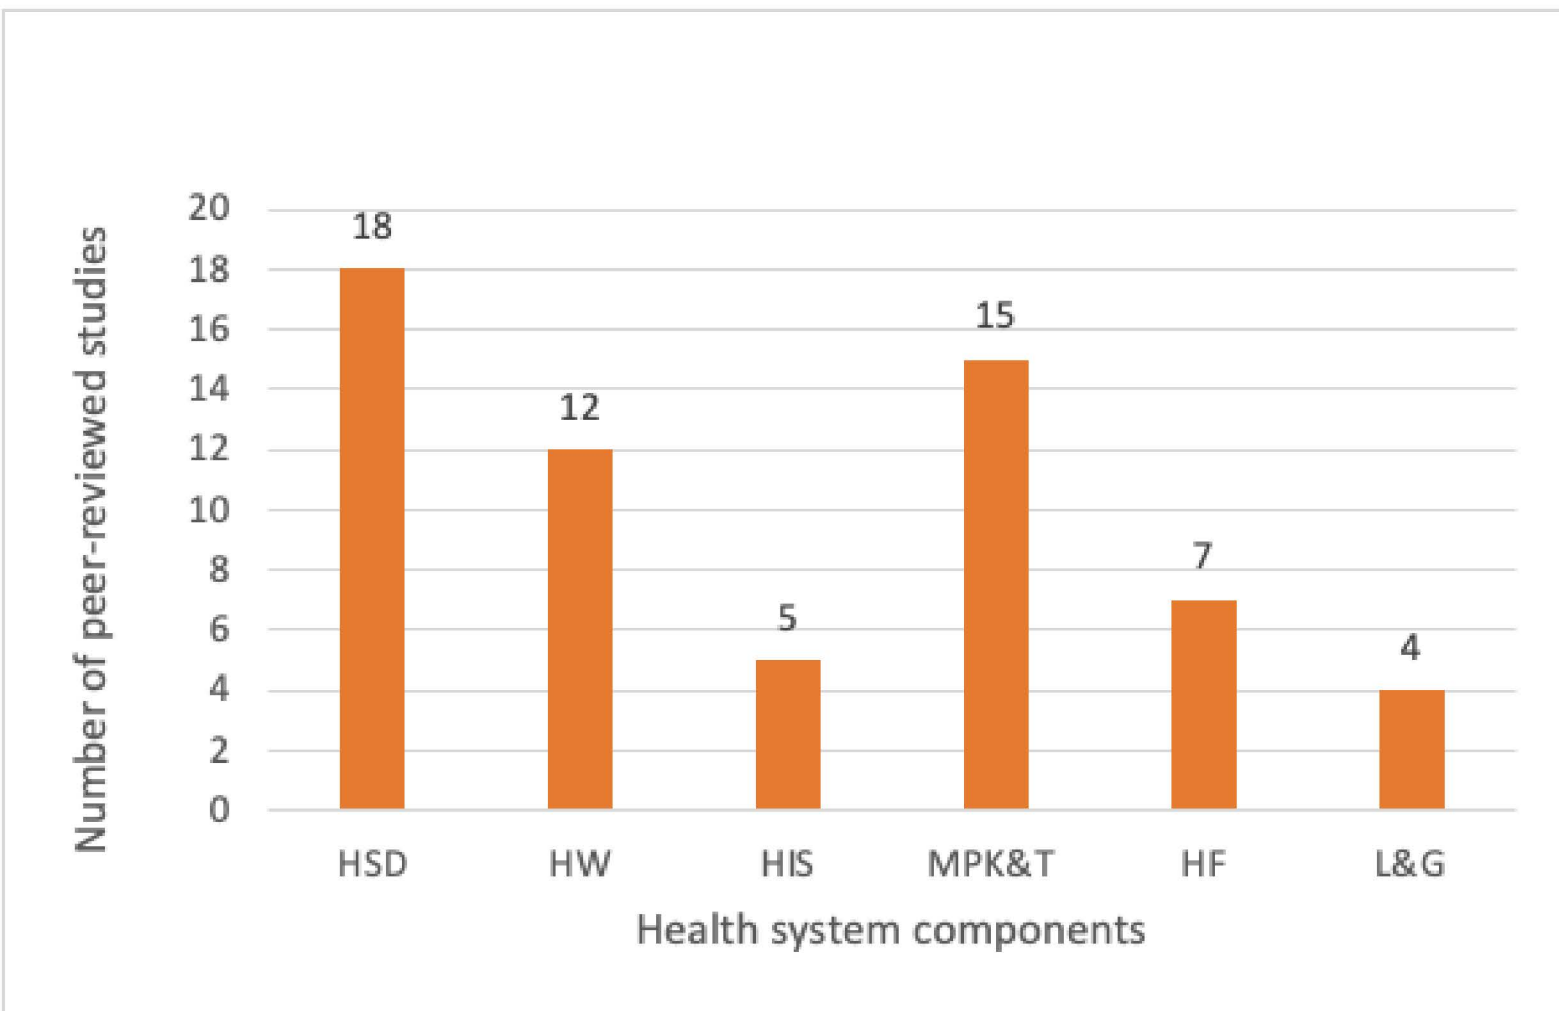

b

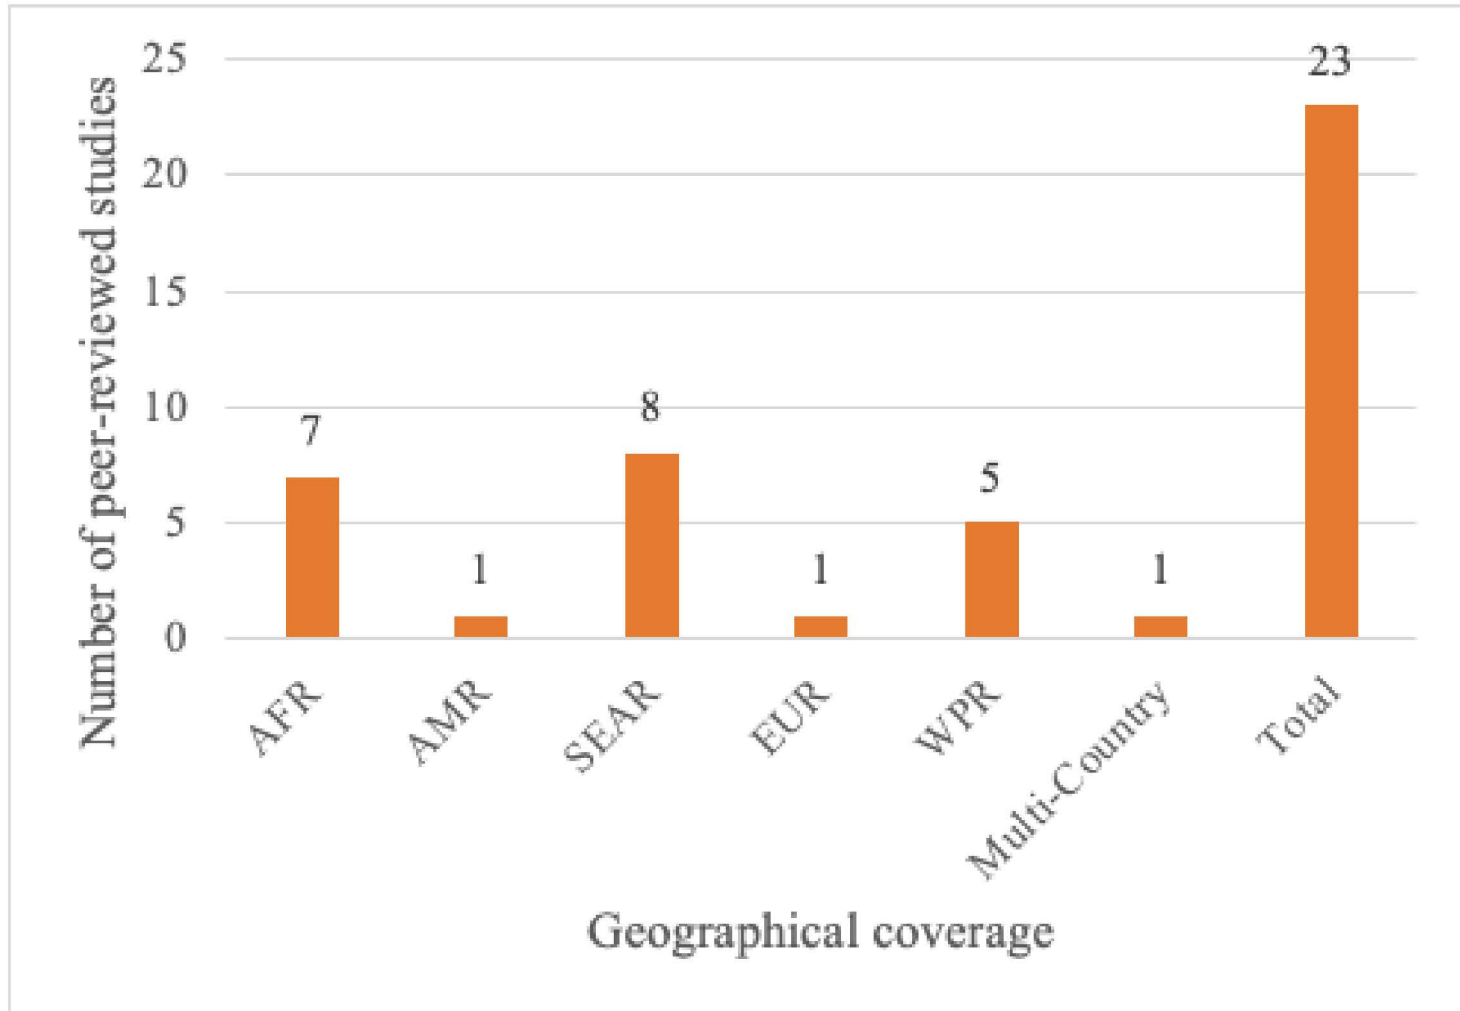

c

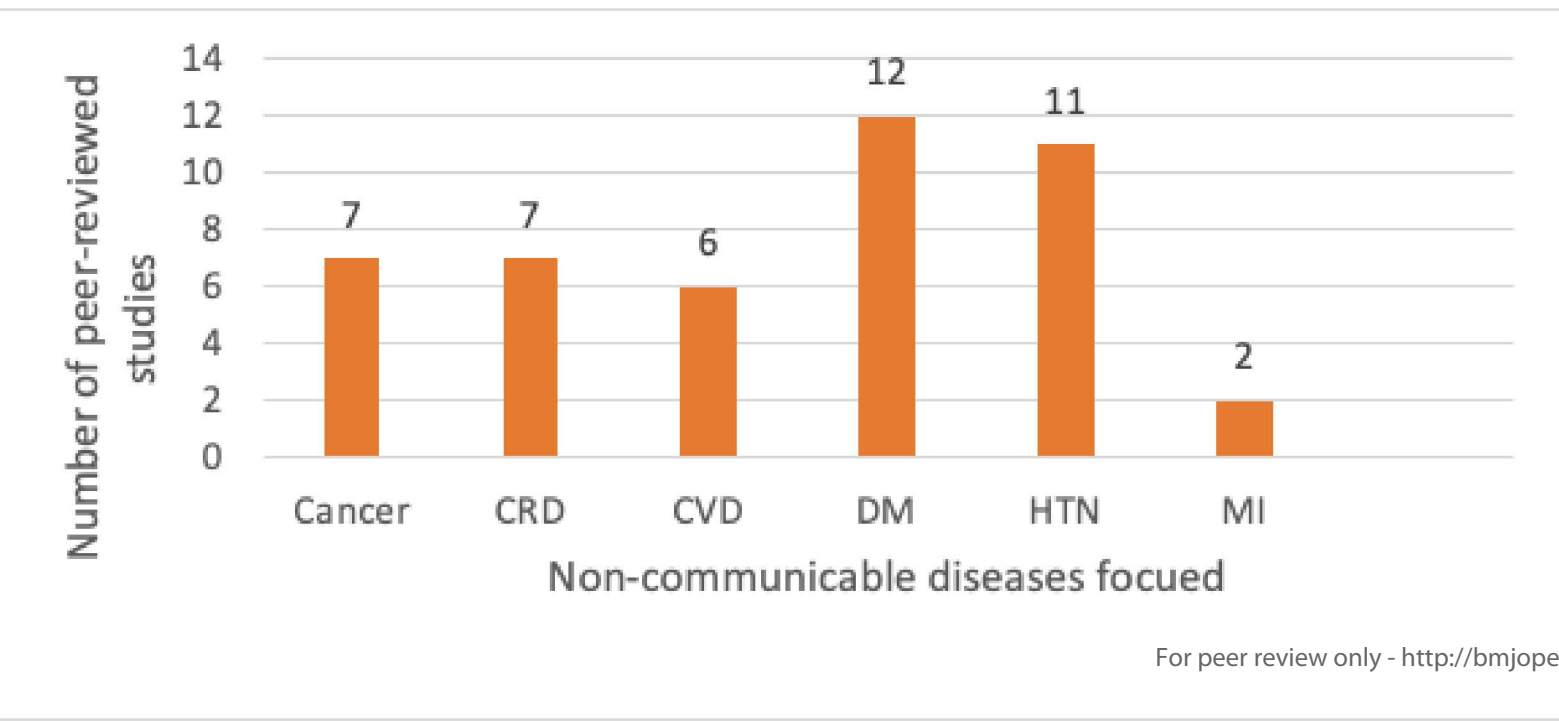

d

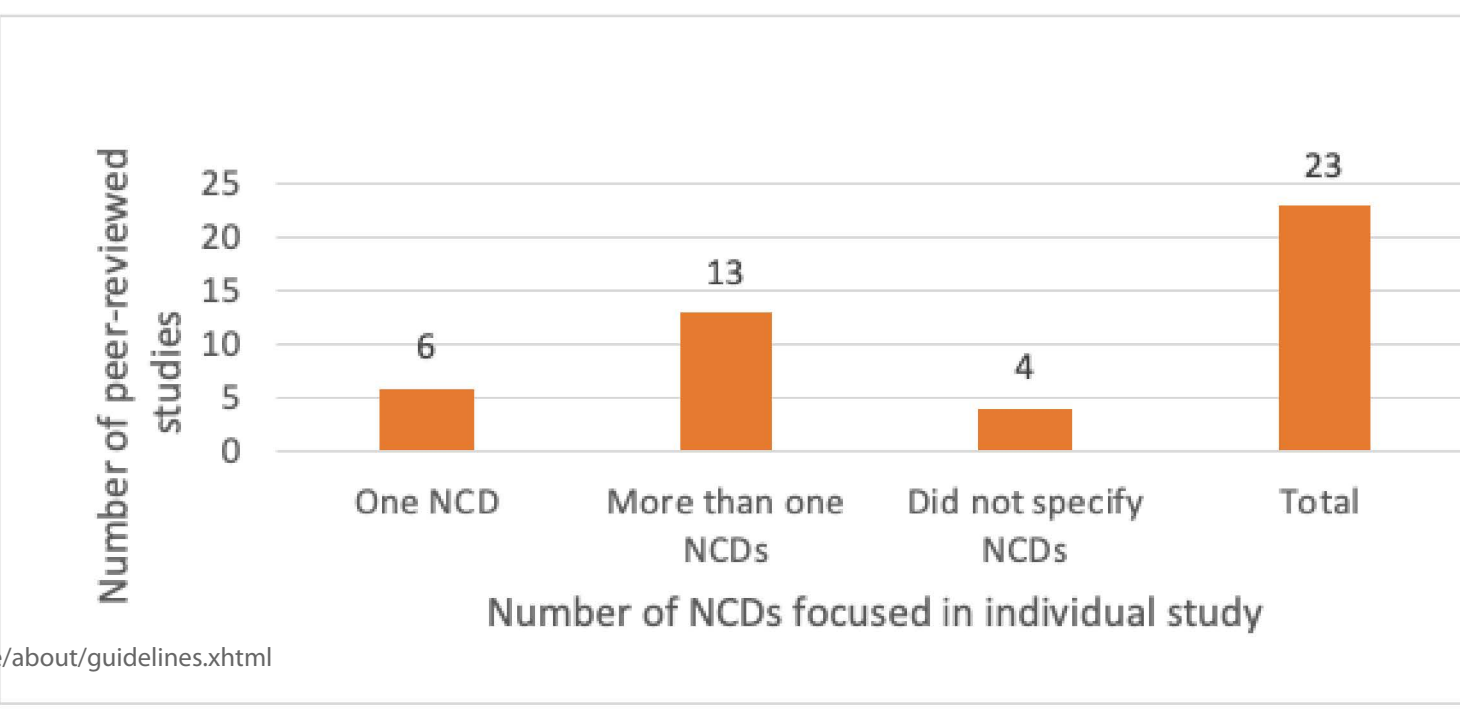

## Supplementary appendix

**Table S1. Literature search strategy**

Database(s): **Ovid MEDLINE(R) and Epub Ahead of Print, In-Process, In-Data-Review & Other Non-Indexed Citations, Daily and Versions(R)** Search Strategy:1<sup>st</sup> of January 1984 to July 30<sup>th</sup> 2021

| #  | Searches                                                                                                                                                                                                                                                                                                                                                                                        |
|----|-------------------------------------------------------------------------------------------------------------------------------------------------------------------------------------------------------------------------------------------------------------------------------------------------------------------------------------------------------------------------------------------------|
| 1  | chronic disease/ or multiple chronic conditions/ or non communicable disease/                                                                                                                                                                                                                                                                                                                   |
| 2  | (chronic disease* or chronic disorder* or chronic* sick* or chronic health condition* or chronic medical condition* or chronic* ill* or long term condition* or multimorbidit* or mult imorbidit*).mp.                                                                                                                                                                                          |
| 3  | (non-communicable disease* or non-infectious disease* or noncommunicable disease* or noninfectious disease*).mp.                                                                                                                                                                                                                                                                                |
| 4  | (cardiovascular disease* or coronary artery disease* or myocardial isch?emia or myocardial infarct* or pulmonary disease* or chronic obstructive pulmonary or chronic obstructive lung or chronic obstructive respiratory or diabetes or coronary heart disease* or neoplasm* or cancer*).mp.                                                                                                   |
| 5  | (hypertension or hypertriglycerid?emi* or hyper triglycerid?emi* or high triglyceride* or high cholesterol or hypercholesterol?emi* or hyperlipid?emia* or hyperlipidemi*).mp.                                                                                                                                                                                                                  |
| 6  | (diastolic pressure or systolic pressure or blood pressure or cardiometabolic syndrome*).mp.                                                                                                                                                                                                                                                                                                    |
| 7  | (copd or asthma or renal disease* or kidney disease*).mp.                                                                                                                                                                                                                                                                                                                                       |
| 8  | 1 or 2 or 3 or 4 or 5 or 6 or 7                                                                                                                                                                                                                                                                                                                                                                 |
| 9  | Primary Health Care/                                                                                                                                                                                                                                                                                                                                                                            |
| 10 | Delivery of Health Care/                                                                                                                                                                                                                                                                                                                                                                        |
| 11 | (primary health system or primary health service or primary healthcare system or primary health care system or primary healthcare service or primary health care service or primary medical service delivery or primary medical care service or primary care service or primary care system).mp.                                                                                                |
| 12 | (first-level healthcare or first-level health care or first-level health system* or first-level health facilit* or local health system* or local health care or local healthcare or local-level health*).mp.                                                                                                                                                                                    |
| 13 | ((primary or first-level or local) adj3 health* adj3 (clinic* or center* or centre* or setting*)).mp.                                                                                                                                                                                                                                                                                           |
| 14 | 9 or 10 or 11 or 12                                                                                                                                                                                                                                                                                                                                                                             |
| 15 | 8 and 14                                                                                                                                                                                                                                                                                                                                                                                        |
| 16 | (readiness or preparedness or capacity or quality improvement or quality of Improvement).mp.                                                                                                                                                                                                                                                                                                    |
| 17 | 15 and 16                                                                                                                                                                                                                                                                                                                                                                                       |
| 18 | ((primary care or primary health care or primary healthcare or primary health system* or primary medical service* or primary medical care or (first-level healthcare or first-level health care or first-level health system* or first-level health facilit* or local health system* or local health care or local healthcare or local-level health*)) adj5 (accessibility or availability).mp. |
| 19 | 8 and 18                                                                                                                                                                                                                                                                                                                                                                                        |
| 20 | ((primary care or primary health care or primary healthcare or primary health system* or primary medical service* or primary medical care or (first-level healthcare or first-level health care or first-level health system* or first-level health facilit* or local health system* or local health care or local healthcare or local-level health*)) adj (need* or demand*).mp.               |
| 21 | 8 and 20                                                                                                                                                                                                                                                                                                                                                                                        |
| 22 | ((primary or first-level or local) adj3 health* adj3 (clinic* or center* or centre* or setting*) adj3 (need* or demand*).mp.                                                                                                                                                                                                                                                                    |

|    |                                                                      |
|----|----------------------------------------------------------------------|
| 23 | 8 and 22                                                             |
| 24 | 17 or 19 or 21 or 23                                                 |
| 25 | limit 24 to english language                                         |
| 26 | limit 25 to (case reports or comment or editorial or letter or news) |
| 27 | 25 not 26                                                            |

**Database(s): Embase Classic+Embase**

**Search Strategy:**

| #  | Searches                                                                                                                                                                                                                                                                                                                                                                                                                                                                                                                                                                                                                                                                                                                                                                                                                                                                                                                                                                                                                        |
|----|---------------------------------------------------------------------------------------------------------------------------------------------------------------------------------------------------------------------------------------------------------------------------------------------------------------------------------------------------------------------------------------------------------------------------------------------------------------------------------------------------------------------------------------------------------------------------------------------------------------------------------------------------------------------------------------------------------------------------------------------------------------------------------------------------------------------------------------------------------------------------------------------------------------------------------------------------------------------------------------------------------------------------------|
| 1  | exp antineoplastic agent/ or cancer therapy/ or bone marrow purging/ or bone marrow rescue/ or exp cancer adjuvant therapy/ or exp cancer chemotherapy/ or cancer gene therapy/ or cancer hormone therapy/ or exp cancer immunotherapy/ or exp cancer radiotherapy/ or multimodality cancer therapy/ or oncolytic virotherapy/ or target cell destruction/ or immunotherapy/ or adoptive immunotherapy/ or exp chimeric antigen receptor immunotherapy/ or radioimmunotherapy/ or exp radiotherapy/ or exp bone marrow transplantation/ or exp hematopoietic stem cell transplantation/ or stem cell transplantation/ or cancer patient/ or cancer survivor/                                                                                                                                                                                                                                                                                                                                                                    |
| 2  | exp neoplasm/dt, rt [Drug Therapy, Radiotherapy]                                                                                                                                                                                                                                                                                                                                                                                                                                                                                                                                                                                                                                                                                                                                                                                                                                                                                                                                                                                |
| 3  | (anti-cancer* or anti-neoplas* or anticancer* or antineoplas* or anticancerogen* or anticarcinogen* or anti-carcinogen* or anti-tumo?r* or antitumor?r* or cancer inhibitor* or tumor?r inhibitor* or anti-leukemi* or antileukemi* or oncotherap* or antimetastatic* or anti-metastatic* or antimetastas#s or anti-metastas#s).mp.                                                                                                                                                                                                                                                                                                                                                                                                                                                                                                                                                                                                                                                                                             |
| 4  | ((cancer* or tumor?r* or neoplas* or carcinoma* or malignan* or adenocarcinoma* or sarcoma* or lymphoma* or leukemia* or blastoma* or carcinostatic or oncolog* or carcinocidal or oncocidal or oncostatic) adj3 (therap* or drug* or agent* or chemotherap* or electrochemotherap* or treat* or medication* or compound* or immunotherap* or immunological or immunomodul* or immunomodurat*)).mp.                                                                                                                                                                                                                                                                                                                                                                                                                                                                                                                                                                                                                             |
| 5  | ((adenoma* or chondrosarcoma* or osteosarcoma* or rhabdomyosarcoma* or astrocytoma* or ependymoma* or glioma* or neuroblastoma* or medulloblastoma* or oligodendroglioma* or pheochromocytoma* or retinoblastoma* or cholangiocarcinoma* or melanoma* or mesothelioma* or pheochromocytoma* or paraganglioma* or craniopharyngioma* or esthesioneuroblastoma* or myeloma*) adj (therap* or treatment* or drug* or agent* or medication* or vaccine*)).mp.                                                                                                                                                                                                                                                                                                                                                                                                                                                                                                                                                                       |
| 6  | ((cancer or tumor?r) adj (cure* or healing or remed* or vaccin* or adjuvant therap* or multichemotherap* or polychemotherap* or gene therap* or hormon* therap* or radiation or irradiation or ablation or immun* therap*)).mp.                                                                                                                                                                                                                                                                                                                                                                                                                                                                                                                                                                                                                                                                                                                                                                                                 |
| 7  | ((cancer or carcinoma or adenocarcinoma or sarcoma or lymphoma or leukemia or blastoma or adenoma or chondrosarcoma or osteosarcoma or rhabdomyosarcoma or astrocytoma or ependymoma or glioma or neuroblastoma or medulloblastoma or oligodendroglioma or pheochromocytoma or retinoblastoma or cholangiocarcinoma or melanoma* or mesothelioma or pheochromocytoma or paraganglioma or craniopharyngioma or esthesioneuroblastoma or myeloma or oncolog*) adj (patient* or survivor* or sufferer*)).mp.                                                                                                                                                                                                                                                                                                                                                                                                                                                                                                                       |
| 8  | (alkylating adj (agent* or chemical* or compound* or cytostatic*)).mp.                                                                                                                                                                                                                                                                                                                                                                                                                                                                                                                                                                                                                                                                                                                                                                                                                                                                                                                                                          |
| 9  | ((((angiogenesis or neovascularisation or tumor?r vascularisation) adj inhibitor*) or ((angiostatic or anti-angiogenesis or antiangiogenesis or anti-angiogenic or antiangiogenic or antimutagenic) adj (agent* or drug*))).mp.                                                                                                                                                                                                                                                                                                                                                                                                                                                                                                                                                                                                                                                                                                                                                                                                 |
| 10 | (abecomotide or abemaciclib or abexinostat or abieslactone or abivertinib or abrotanone or aburatubolactam A or aburatubolactam C or abyssinone V or acalabrutinib or acalisib or aceglatone or acodazole or adaphostin or adarotene or adavosertib or aderbasib or afamitresgene autoleucel or afatinib or afuresertib or Agaricus blazei extract or agatolimod or agerafenib or aglatimagene or besadenovec or albicanyl acetate or aldesleukin or alectinib or alicdamotide or alisertib or adozelesin or alkanesulfonic acid or amsacrine or amsacrine derivative or asulacrine isethionate or busulfan or dimethylbusulfan or mesylic acid or mesylic acid derivative or mesylic acid ethyl ester or mesylic acid methyl ester or mesylmesylic acid 2 chloroethyl ester or methylene dimesylate or treosulfan or ametantrone or anaxirone or aziridine derivative or apaziquone or azimexon or aziridine or aziridinylbenzoquinone or azirine derivative or carboquinone or ciamexon or diaziquone or dipin or pumitepa or |

1  
2  
3  
4  
5  
6  
7  
8  
9  
10  
11  
12  
13  
14  
15  
16  
17  
18  
19  
20  
21  
22  
23  
24  
25  
26  
27  
28  
29  
30  
31  
32  
33  
34  
35  
36  
37  
38  
39  
40  
41  
42  
43  
44  
45  
46  
47  
48  
49  
50  
51  
52  
53  
54  
55  
56  
57  
58  
59  
60

|           |                                                                                                                                                                                                                                                                                                                                                                                                                                                                                                                                                                                                                                                                                                                                                                                                                                                                                                                                                                                                                                                                                                                                                                                                                                                                                                                                                                                                                                                                                                                                                                                                                                                                                                                                                                                                                                                                                                                                                                                                                                                                                                                                                                                                                                                                                                                                                                                                                                                                                                                                    |
|-----------|------------------------------------------------------------------------------------------------------------------------------------------------------------------------------------------------------------------------------------------------------------------------------------------------------------------------------------------------------------------------------------------------------------------------------------------------------------------------------------------------------------------------------------------------------------------------------------------------------------------------------------------------------------------------------------------------------------------------------------------------------------------------------------------------------------------------------------------------------------------------------------------------------------------------------------------------------------------------------------------------------------------------------------------------------------------------------------------------------------------------------------------------------------------------------------------------------------------------------------------------------------------------------------------------------------------------------------------------------------------------------------------------------------------------------------------------------------------------------------------------------------------------------------------------------------------------------------------------------------------------------------------------------------------------------------------------------------------------------------------------------------------------------------------------------------------------------------------------------------------------------------------------------------------------------------------------------------------------------------------------------------------------------------------------------------------------------------------------------------------------------------------------------------------------------------------------------------------------------------------------------------------------------------------------------------------------------------------------------------------------------------------------------------------------------------------------------------------------------------------------------------------------------------|
|           | <p>thiotepa or tretamine or tretazicar or triaziquone or uredopa or banoxantrone or bisantrene or bizelesin or brostallicin or carboplatin or carzelesin or chlormethine derivative or acridine mustard or aldophosphamide or alestramustine or ambamustine or amustaline or aniline mustard or bendamustine or benzoquinone mustard or bestrabucil or canfosfamide or chlorambucil or chlormethine or chlornaphazine or cloturin or cortifen or cyclophosphamide or cydrin or dichlorodiethylamine or dopan or estramustine or evofosfamide or galamustine or glufosfamide or gonadorelin or ifosfamide or laromustine or mafosfamide or mafosfamide cyclohexylamine or mafosfamide lysine or mannomustine or melphalan or mepacrine mustard or palifosfamide or peptichemio or perfosfamide or phenesterin or phosphoramidate mustard or sarcolysin or sufosfamide or tallimustine or tinostamustine or trofosfamide or uramustine or xylamine or cisplatin or cyclodisone or dacarbazine or dianhydrogalactitol or etoglucid or imidacrine or irofulven or ledoxantrone or losoxantrone or mitoxantrone or nitrosourea derivative or bofumustine or butylnitrosourea or carmustine or chloroethylnitrosourea or chloroethylnitrosourea derivative or cystemustine or ecomustine or elmustine or estradiol 17 or ethylnitrosourea or fotemustine or lomustine or methylnitrosourea or nimustine or nitrosourea or prednimustine or ranimustine or semustine or spirazidine or spiromustine or streptozocin or taumustine or nortopixantrone or oxanthrazole or pentamethylmelamine or pixantrone or procarbazine or teloxantrone or temozolomide or topixantrone or alobresib or alpelisib or alpha sarcin or altemicidin or alteminostat or altiratinib or altretamine or ambazone or amcasertib or amidox or aminothiadiazole or amonafide or amphethinile or amphidinolide A or amphidinolide B or amphidinolide D or amsilarotene or amuvatinib).mp.</p>                                                                                                                                                                                                                                                                                                                                                                                                                                                                                                                                                                     |
| <p>11</p> | <p>(acrizanib or aflibercept or aganirsen or alofanib or anecortave or anginex or angiostatic protein or angiostatin or angiozyme or atiprimod or avadomide or axitinib or beloranib or bermekimab or bevasiranib or brivanib or cabozantinib or canstatin or caplostatin or carlumab or carotuximab or cediranib or cenupatide or cetuximab or cilengitide or combretastatin A1 phosphate or conbercept or conendostatin or crenolanib or crizotinib or dalantercept or depudecin or dovitinib or endostatin or endothelial monocyte activating polypeptide II or fexapotide or foretinib or foslinanib or fruquintinib or fumagillol chloroacetylcarbamate or glesatinib or infigratinib or lapatinib plus pazopanib or lenalidomide or lenvatinib or linifanib or lucitanib or maspin or monoclonal antibody DC101 or monoclonal antibody imc 1c11 or motesanib or muparfostat or dicarboxamide or navicixizumab ornintedanib or ofranergene obadenovec or oglufanide or orantinib or paclitaxel or pazopanib or pegaptanib or pegdinetanib or pegpleranib or pixatimod or pomalidomide or ranibizumab or recombinant endostatin or regorafenib or relzomostat or rinucumab or risuteganib or roneparstat or semaxanib or "siRNA 027" or sonepcizumab or sorafenib or squalamine or sunitinib or tanomastat or tasquinimod or tesevatinib or thalidomide or thrombospondin 1 or thrombospondin 2 or tigapotide or tiomolibdate choline or tirbanibulin or tivozanib or toceranib or trabedersen or trebananib or tumstatin or vandetanib or varisacumab or vascular endothelial growth inhibitor or vascular endothelial cell growth inhibitor or vascular endothelial growth factor antagonist vascular endothelial growth factor inhibitor or VEGF inhibitor or vasculotropin inhibitor or abicipar pegol or bevacizumab or brotucizumab or catequentinib or dilpacimab or faricimab or olinvacimab or pamufetinib or ramucirumab or rivoceranib or sintilimab or vulinacimab vatalanib or volociximab or vorolanib or metastasis inhibitor or carcinostatic alkaloid or acronine or afeletecan or atiratecan or becatecarin or belotecan or camptothecin or topotecan or cephalotaxine or coralyne or cositecan or cyclopamine or datelliptium chloride or deacetylvinblastine or demecolcine or diazepinomicin or diflomotecan or ellipravin or ellipticine or elliptinium or elomotecan or etirinotecan pegol or etoposide or exatecan or exatecan alideximer or fagaronine or firtecan or gimatecan or govitecan).mp.</p> |
| <p>12</p> | <p>(harringtonine or homoharringtonine or indicine n oxide or indirubin or irinotecan or lorvotuzumab mertansine or lurbinedectin or maytansine or mitopodozide or mureletecan or namitecan or napavin or narciclasine or nitidine or olivacine or patidegib or pazelliptine or pegamotecan or retelliptine or rubitecan or senecionine or sinococuline or solamargine or swainsonine or tenifatecan or teniposide or thalicarpine or trabectedin or trewiasine or trimethylcolchicinic acid or vinblastine or vincristine or vindesine or vinflunine or vinfosiltine or vinleucinol or vinleurosine or vinorelbine tartrate or vintafolide or vintriptol or vinzolidine or withanolide or carcinostatic antibiotic or 21 aminoepothilone B or 3 deazaaristeromycin or actinobolin or 7 aminodactinomycin or actinomycin derivative or adozelesin or alanosine or alvespimycin or ankinomycin or anthracycline antibiotic agent* or 11 deoxydaunorubicin or 2 fluoroidarubicin or 2 pyrrolinodoxorubicin or 4 demethoxy 11 deoxydaunomycinone or 4 demethoxydaunomycinone or 4 demethoxydoxorubicin or 4 iodoesorubicin or 5 iminodaunorubicin or 9 deacetyl 9 methylidarubicin or 9 deoxydoxorubicin or aclacinomycin or aclacinomycin B or aclarubicin or adriamycinone or aklavinone or aldoxorubicin or amrubicin or annamycin or anthracycline or anthracyclinone derivative or barminomycin I or berubicin or camsirubicin or carubicin or cinerubin A or</p>                                                                                                                                                                                                                                                                                                                                                                                                                                                                                                                                                                                                                                                                                                                                                                                                                                                                                                                                                                                                                                                                |

|    |                                                                                                                                                                                                                                                                                                                                                                                                                                                                                                                                                                                                                                                                                                                                                                                                                                                                                                                                                                                                                                                                                                                                                                                                                                                                                                                                                                                                                                                                                                                                                                                                                                                                                                                                                                                                                                                                                                                                                                                                                                                                                                                                                                                                                                                                                                                                                                                                                                                                                                                                                                                                                                                                                                                                                                                                                                                                                                                                                                                                                                                                                                               |
|----|---------------------------------------------------------------------------------------------------------------------------------------------------------------------------------------------------------------------------------------------------------------------------------------------------------------------------------------------------------------------------------------------------------------------------------------------------------------------------------------------------------------------------------------------------------------------------------------------------------------------------------------------------------------------------------------------------------------------------------------------------------------------------------------------------------------------------------------------------------------------------------------------------------------------------------------------------------------------------------------------------------------------------------------------------------------------------------------------------------------------------------------------------------------------------------------------------------------------------------------------------------------------------------------------------------------------------------------------------------------------------------------------------------------------------------------------------------------------------------------------------------------------------------------------------------------------------------------------------------------------------------------------------------------------------------------------------------------------------------------------------------------------------------------------------------------------------------------------------------------------------------------------------------------------------------------------------------------------------------------------------------------------------------------------------------------------------------------------------------------------------------------------------------------------------------------------------------------------------------------------------------------------------------------------------------------------------------------------------------------------------------------------------------------------------------------------------------------------------------------------------------------------------------------------------------------------------------------------------------------------------------------------------------------------------------------------------------------------------------------------------------------------------------------------------------------------------------------------------------------------------------------------------------------------------------------------------------------------------------------------------------------------------------------------------------------------------------------------------------------|
|    | <p>cinerubin B or daunomycinone or daunorubicin or monoclonal antibody conjugate or daunorubicinol or decilrubicin or detorubicin or ditrisarubicin B or doxorubicin or doxorubicinol or epirubicin or epirubicinol or epsilon rhodomycinone or esorubicin or galarubicin or gancotamab or idarubicin or idarubicinol or ladirubicin or leurubicin or n benzylidoxorubicin 14 valerate or n trifluoroacetyldoxorubicin or n trifluoroacetyldoxorubicin 14 hydrogen adipate or nemorubicin or obelmycin or oxaunomycin or pirarubicin or pyrromycinone or rhodomycin A or rodorubicin or ruboxyl or sabarubicin or valrubicin or viriplanin A or zoptarelin doxorubicin or zorubicin or anthramycin or arasangivamycin or asperlin or auromomycin or azaserine or bactobolin or bizelesin or blasticidin S or bleomycin or bleomycinic acid or liblomycin or pepleomycin or cactinomycin or cadeguomycin or calicheamicin or gemtuzumab or inotuzumab ozogamicin or calphostin or caplostatin or carzelesin or chartreusin or chlorozotocin or chromomycin or chrysomycin or colabomycin A or congocidine or cordycepin or dactinomycin or dehydrodidemnin B or dehydroxysparsomycin or didemnin or distamycin A derivative or duocarmycin or duocarmazine or duocarmycin SA or dynemicin A or echinomycin or echinosporin or elsamicin A or epothilone or esperamicin or formycin or fostriecin or fredericamycin A or fumagillin or fumagillo).mp.</p>                                                                                                                                                                                                                                                                                                                                                                                                                                                                                                                                                                                                                                                                                                                                                                                                                                                                                                                                                                                                                                                                                                                                                                                                                                                                                                                                                                                                                                                                                                                                                                                                                                                       |
| 13 | <p>(geldanamycin or gilvocarcin V or glidobactin or granaticin or hadacidin or herbimycin or himastatin or illudin or irofulven or ixabepilone or kapurimycin or kedarcidin or leinamycin or lidamycin or luzopeptin or macbecin I or macromomycin or marcellomycin or menogaril or mithramycin or 7 n acetylmitomycin C or mitomycin or porfiromycin or musettamycin or mycophenolic acid or n bromoacetyldistamycin A or neothramycin or neplanocin A or nogalamycin or olivomycin or oxanosine or ozogamicin or pactamycin or pibenzimol or pibrozelesin or pirazofurin or prodigiosin or puromycin or pyrindamycin A or pyrindamycin B or quinocarcin or rachelmycin or rebeccamycin or resorthiomycin or retaspimycin or reumycin or rodaplutin or romidepsin or rubomycin or rufocromomycin or saframycin or sagopilone or sangivamycin or sapurimycin or sarkomycin or showdomycin or sibiromycin or sparsomycin or spergualin orspicamycin or spongistatin 1 or spongistatin 2 or streptonigrin derivative or tallysomycin or tanespimycin or tetracenomycin C or thiocoraline or thrazarine or tomaymycin or tubercidin or tuftsin or vicienistatin or yunnanmycin or zinostatin or buthionine sulfoximine or folic acid antagonist or folic acid antimetabolite or pteroylglutamic acid antimetabolite or 10 deazaaminopterin or 7 hydroxymethotrexate or aminopterin or arfolitixorin or bromebric acid or dichloromethotrexate or edatrexate or gamma fluoromethotrexate or homofolic acid or lometrexol or metesind or methotrexate or metodiclorofen or nolatrexed or pelitrexol or pemetrexed or piritrexim or plevitrexed or pralatrexate or raltitrexed or talotrexin or triazinate or trimetrexate or oxythiamine or purine antagonist or 4 carbamoylimidazolium 5 olate or 6 methylthioinosine or 6 n benzyladenosine or 8 azaguanine or azaguanosine or azathioprine or cladribine or clofarabine or cloturin or deoxythioguanosine or dezaguanine or fludarabine or guanine 7 oxide or guanine arabinoside or mercaptopurine or nelarabine or pentostatin or selenazofurin or sulfenosine or sulfinosine or sulfonosine or thioguanosine or tiazofurin or tioguanine or pyrimidine antagonist or 3 deazauridine or 3 ethynylcytidine or 5 chlorodeoxycytidine or 5 hydroxymethyldeoxyuridine or 5 aminothymidine or 5 deoxy 5 fluorocytidine or 6 azacytidine or ancitabine or azacitidine or azauracil or azauridine or brequinar or bromodeoxycytidine or capecitabine or carmofur or cloxuridine or cytarabine or cytarazid or decitabine or dihydrofluorouracil or doxifluridine or elacytarabine or emitetur or enocitabine orfazarabine or fiacitabine or floxuridine or flucytosine deoxyriboside or fluorouracil or fluorouridine or fosfluridine tidoxil or fosgemcitabine palabenamide or fosifloxuridine nafalbenamide or galocitabine or gemcitabine or gimeracil plus oteracil potassium plus tegafur or guadecitabine or orzel or ropidoxuridine or sapacitabine or tegafur or tezacitabine or tipiracil plus trifluridine or troxacitabine or uracil arabinoside).mp.</p> |
| 14 | <p>(4 hydroxytoremifene or abiraterone or acetylsalicylic acid plus aluminum hydroxide plus ascorbic acid plus prednisone or acetylsalicylic acid plus caffeine plus phenacetin plus prednisolone or acetylsalicylic acid plus calcium carbonate plus methylprednisolone or acetylsalicylic acid plus calcium carbonate plus prednisolone or acetylsalicylic acid plus methylprednisolone or acetylsalicylic acid plus prednisolone or acolbifene or afimoxifene or aluminum hydroxide plus ascorbic acid plus prednisone plus salicylamide or aluminum hydroxide plus calcium ascorbate plus calcium carbonate plus pantothenate calcium plus potassium salicylate plus prednisone or aluminum hydroxide plus magnesium trisilicate plus pantothenate calcium plus prednisolone or aluminum hydroxide plus magnesium trisilicate plus prednisone or amcenestrant or angiopeptin or apalutamide or aromatase inhibitor or estrogen synthetase inhibitor or oestrogen synthetase inhibitor or steroid aromatase inhibitor or abyssinone II or aminogluthethimide or anastrozole or atamestane or exemestane or fadrozole or finrozole or formestane or leflutrozoole or letrozole or liarozole or minamestane or plomestane or pyridoglutethimide or testolactone or vorozole or arzoxifene or ascorbic acid plus chlorpheniramine maleate plus prednisone or ascorbic acid plus chlorpheniramine plus prednisone or avorelin or bestrabucil or bicalutamide or buserelin or calcium</p>                                                                                                                                                                                                                                                                                                                                                                                                                                                                                                                                                                                                                                                                                                                                                                                                                                                                                                                                                                                                                                                                                                                                                                                                                                                                                                                                                                                                                                                                                                                                                                                                                       |

|           |                                                                                                                                                                                                                                                                                                                                                                                                                                                                                                                                                                                                                                                                                                                                                                                                                                                                                                                                                                                                                                                                                                                                                                                                                                                                                                                                                                                                                                                                                                                                                                                                                                                                                                                                                                                                                                                                                                                                                                                                                                                                                                                                                                                                                                                                                                                                                                                                                                                                                                                                                                                                                                                                                                                                                                                                                                                                                                                                                                                                                                                                                                                                                                                                                                                                                                                                                                        |
|-----------|------------------------------------------------------------------------------------------------------------------------------------------------------------------------------------------------------------------------------------------------------------------------------------------------------------------------------------------------------------------------------------------------------------------------------------------------------------------------------------------------------------------------------------------------------------------------------------------------------------------------------------------------------------------------------------------------------------------------------------------------------------------------------------------------------------------------------------------------------------------------------------------------------------------------------------------------------------------------------------------------------------------------------------------------------------------------------------------------------------------------------------------------------------------------------------------------------------------------------------------------------------------------------------------------------------------------------------------------------------------------------------------------------------------------------------------------------------------------------------------------------------------------------------------------------------------------------------------------------------------------------------------------------------------------------------------------------------------------------------------------------------------------------------------------------------------------------------------------------------------------------------------------------------------------------------------------------------------------------------------------------------------------------------------------------------------------------------------------------------------------------------------------------------------------------------------------------------------------------------------------------------------------------------------------------------------------------------------------------------------------------------------------------------------------------------------------------------------------------------------------------------------------------------------------------------------------------------------------------------------------------------------------------------------------------------------------------------------------------------------------------------------------------------------------------------------------------------------------------------------------------------------------------------------------------------------------------------------------------------------------------------------------------------------------------------------------------------------------------------------------------------------------------------------------------------------------------------------------------------------------------------------------------------------------------------------------------------------------------------------------|
|           | <p>phosphate dibasic plus cyanocobalamin plus ethinylestradiol plus methylphenidate plus methyltestosterone plus nicotinamide plus pyridoxine plus riboflavin plus thiamine or calusterone or carisoprodol plus prednisolone or chloramphenicol plus prednisolone or chlorbutol plus phenylephrine plus prednisolone acetate or chlorotrianisene or chlorpheniramine gluconate plus prednisolone acetate or chlorzoxazone plus paracetamol plus prednisolone or conjugated estrogen or cyproterone or deslorelin or diethylstilbestrol derivative or dienestrol or diethylstilbestrol or fosfestrol or hexestrol or methestrol or dimethylstilbestrol or droloxifene or drostanolone or ectylurea plus ethoxzolamide plus medroxyprogesterone acetate or endoxifen or enzalutamide or ephedrine plus phenobarbital plus prednisone plus theophylline or estradiol undecylate or ethinylestradiol or fluoxymesterone or flutamide or fulvestrant or galeterone or gentamicin plus prednisolone acetate or gestonorone or goserelin or gramicidin plus neomycin plus phenylephrine plus prednisolone acetate or hydroxyflutamide or hydroxyprogesterone or hydroxytamoxifen or hydroxyzine plus prednisolone or idoxifene or leuprorelin or medroxyprogesterone or megestrol or melengestrol or mephenesin plus methylphenobarbital plus prednisone or mepitiostane).mp.</p>                                                                                                                                                                                                                                                                                                                                                                                                                                                                                                                                                                                                                                                                                                                                                                                                                                                                                                                                                                                                                                                                                                                                                                                                                                                                                                                                                                                                                                                                                                                                                                                                                                                                                                                                                                                                                                                                                                                                                                                             |
| <p>15</p> | <p>(methoxyphenamine plus methylprednisolone or methylprednisolone or methyltestosterone or miproxifene or nafarelin or nandrolone or neomycin plus phenylephrine plus phenylpropanolamine plus prednisolone sodium phosphate or neomycin plus phenylephrine plus prednisolone or neomycin plus phenylephrine plus prednisolone acetate or neomycin plus polymyxin B plus prednisolone acetate or neomycin plus prednisolone or neomycin plus prednisolone acetate or neomycin plus prednisolone sodium phosphate or nilutamide or nortamoxifen or ormeloxifene or orteronel or ospemifene or ozarelix or panomifene or phenylephrine plus prednisolone or pipendoxifene or polyestradiol or prednisolone or prednisone or raloxifene or seviteronel or sivifene or tamoxifen or tesmilifene or testololactone or testosterone propionate or toremifene or trioxifene or triptorelin or zanoterone or zindoxifene or zoptarelin doxorubicin or antineoplastic metal complex or amminebisbutyratodichloro cyclohexylamine platinum or bleomycin cobalt or bleomycin copper or budotitane or capecitabine plus oxaliplatin or carboplatin or carboxyethylgermanium sesquioxide or cisplatin or clivatuzumab tetraxetan or cycloplatam or doxorubicin copper or doxorubicin iron or enloplatin or epratuzumab tetraxetan yttrium y 90 or eptaplatin or imifoplatin or iproplatin or labetuzumab tetraxetan yttrium y 90 or lilotomab satetraxetan lutetium lu 177 or lintuzumab satetraxetan actinium ac 225 or lobaplatin or malopen or miboplatin or miriplatin or nedaplatin or oxaliplatin or oxoplatin or pasireotide tetraxetan gallium ga 68 or picoplatin or platinum ammine cyclohexylamine dichloride or platinum ethylenediamine dichloride or satoreotide tetraxetan or satraplatin or sebriplatin or spirogermanium or spiroplatin or tacatuzumab tetraxetan yttrium y 90 or tetrachloroplatinate potassium or tetrachloroplatinum fast black or tetraplatin or tetulomab tetraxetan lutetium lu 177 or titanocene or triplatin tetranitrate or vipivotide tetraxetan or zeniplatin or antroquinonol or apicidin or apitolisib or aplysianin E or apoptin or apoptosis inducing factor or 2 hydroxymethyl 2 methoxymethyl 3 quinuclidinone or arsenic trioxide or clezutoclast or daratumumab or genistein or isotretinoin or lisavanbulin or moxetumomab pasudotox or otenaproxesul or rimiducid or tapotoclast or apricoxib or arenastatin A or asciminib or aspacytarabine or asparaginase or asunercept or atueveciclib or audencil or avanbulin or avapritinib or avi 4126 or aviscumine or axicabtagene ciloleucel or bafetinib or balamapimod or barasertib or bardoxolone or batabulin or batracylin or beclanorsen or beclin 1 or belapectin or belinostat or belizatinib or belvarafenib or belzupacap sarotalocan or belzutifan or bemcentinib or bempegaldesleukin or benfluron or bersanimab or berzosertib or beta elemene or beta lapachone or bexarotene or bifikafusp alfa or bimiralisib or binimetinib or birabresib or biricodar or birinapant or bisnafide or bistratene or bomedemstat or borofalan b 10 or bortezomib or bosutinib or briciclib or brigatinib or brilanestrant or bropirimine or bryostatin or bullatacin or bullatacinone or buparlisib or cabazitaxel or calaspargase pegol or camelliin B or camidanlumab).mp.</p> |
| <p>16</p> | <p>(adagloxad simolenin or adeggramotide or algenpantucel L or autogene cevumeran or axalimogene filolisbac or baloramotide or baltaleucel T or belagenpumatucl L or biropepimut S or bizalimogene ralaplasmid or cadalimogene ixalentevec or dasiprotimut T or dorgenmeltucel L or eltrapuldencel T or falimarev or galinpepimut S or imm 101 or inalimarev or lapuleucel T or lovaxin b or maveropepimut S or mavilimogene ralaplasmid or mesmulogene ancovacivec or mitumprotimut T or modified vaccinia virus Ankara 5T4 vaccine or nelatimotide or nelipepimut S or olvimulogene nanivacirepvec or ombipepimut S or onamelatucl L or opolimogene capmilisbac or pemlimogene merolisbac or ranagengliotucel T or rasdegafusp alfa or rindopepimut or rocapuldencel T or rovaleucel or ruxotemitide or seviprotimut L or sipuleucel T or tecemotide or tergenpumatucl L or tertomotide or theratope or tipapkinogene sovacivec or tisagenlecleucel T or vadacabtagene leraleucel or vesigenurtucel L or viagenpumatucl L or vitespen or zastumotide or canertinib or capivasertib or capmatinib or caracemide or carbetimer or carfilzomib or carlecortemcel L or carmethizole or ceclazepide or cedazuridine or cemadotin or cenersen or cenisertib or ceralasertib or cerdulatinib or cergutuzumab amunaleukin or ceritinib or cevipabulin or</p>                                                                                                                                                                                                                                                                                                                                                                                                                                                                                                                                                                                                                                                                                                                                                                                                                                                                                                                                                                                                                                                                                                                                                                                                                                                                                                                                                                                                                                                                                                                                                                                                                                                                                                                                                                                                                                                                                                                                                                                                                 |

1  
2  
3  
4  
5  
6  
7  
8  
9  
10  
11  
12  
13  
14  
15  
16  
17  
18  
19  
20  
21  
22  
23  
24  
25  
26  
27  
28  
29  
30  
31  
32  
33  
34  
35  
36  
37  
38  
39  
40  
41  
42  
43  
44  
45  
46  
47  
48  
49  
50  
51  
52  
53  
54  
55  
56  
57  
58  
59  
60

|    |                                                                                                                                                                                                                                                                                                                                                                                                                                                                                                                                                                                                                                                                                                                                                                                                                                                                                                                                                                                                                                                                                                                                                                                                                                                                                                                                                                                                                                                                                                                                                                                                                                                                                                                                                                                                                                                                                                                                                                                                                                                                                                                                                                                                                                                                                                                                                                                                                                                                                                                                                                                                                                                  |
|----|--------------------------------------------------------------------------------------------------------------------------------------------------------------------------------------------------------------------------------------------------------------------------------------------------------------------------------------------------------------------------------------------------------------------------------------------------------------------------------------------------------------------------------------------------------------------------------------------------------------------------------------------------------------------------------------------------------------------------------------------------------------------------------------------------------------------------------------------------------------------------------------------------------------------------------------------------------------------------------------------------------------------------------------------------------------------------------------------------------------------------------------------------------------------------------------------------------------------------------------------------------------------------------------------------------------------------------------------------------------------------------------------------------------------------------------------------------------------------------------------------------------------------------------------------------------------------------------------------------------------------------------------------------------------------------------------------------------------------------------------------------------------------------------------------------------------------------------------------------------------------------------------------------------------------------------------------------------------------------------------------------------------------------------------------------------------------------------------------------------------------------------------------------------------------------------------------------------------------------------------------------------------------------------------------------------------------------------------------------------------------------------------------------------------------------------------------------------------------------------------------------------------------------------------------------------------------------------------------------------------------------------------------|
|    | <p>chloroquine or ciferadenant or ciltacabtagene autoleucel or cintirorgon or citarinostat or clervonafusp alfa or clofazimine or cobimetinib or cobomarsen or colloidal gold or combretastatin or conteltinib or contusugene ladenovec or copanlisib or corynebacterium parvum extract or crenigacestat or crisnatol or cryptophycin or curcumin or custirsen or cyclophosphamide plus doxorubicin plus taxane or cysteine ethyl ester methylcarbamate or cytostatic agent or cytotoxic agent or emtansine or mafodotin or mertansine or ravtansine or soravtansine or tafasitamab or dabrafenib or dacinostat or dacomitinib or dactolisib or damistimagene matitucel or danusertib or danvatirsen or daporinad or darinaparsin or darleukin or darolutamide or dasatinib or davamotecan pegadexamer or decernotinib or defactinib or degarelix or dehydroxymethylepoxyquinomicin or delanzomib or delimotecan or delolimogene mupadenorepvec or demethoxycurcumin or demplatin pegraglumer or denileukin diftitox or derazantinib).mp.</p>                                                                                                                                                                                                                                                                                                                                                                                                                                                                                                                                                                                                                                                                                                                                                                                                                                                                                                                                                                                                                                                                                                                                                                                                                                                                                                                                                                                                                                                                                                                                                                                                    |
| 17 | <p>(azintuzumab or balstilimab or belantamab or bemarituzumab or benufutamab or bexmarilimab or bintrafusp alfa or bivatumab or blinatumomab or blontuvetmab or brentuximab vedotin or brontictuzumab or budigalimab or camrelizumab or cantuzumab or catumaxomab or cemiplimab or cergutuzumab or cetrelimab or cetuximab or cevostamab or cibisatamab or cinrebafusp alfa or cixutumumab orclivatuzumab tetraxetan or cobolimab or codrituzumab or cofetuzumab or coltuximab or conatumumab or cosibelimab or cudarolimab or cusatumab or dacetuzumab or dalotuzumab or daratumumab or datopotamab or demcizumab or demupitamab or denintuzumab or denosumab or depatuzumab or derlotuximab biotin i 131 or detumomab or dilpacimab or dinutuximab or disitamab or dostarlimab or drozitumab or duligotuzumab or durvalumab or dusigitumab or duvortuxizumab or ecomeximab or edrecolomab or efizonerimod alfa or elgemtumab or elotuzumab or emactuzumab or emibetuzumab or enapotamab or enavatuzumab or encelimab or enfortumab or enoblituzumab or enoticumab or ensituximab or envafolimab or epcoritamab or epitumomab or epratuzumab or ertumaxomab or etaracizumab or ezablenimab or farletuzumab or feladilimab or felzartamab or fianlimab or ficlatuzumab or figitumumab or flanvotumab or flotetuzumab or fresolimumab or futuximab or galiximab or gancotamab or ganitumab or gatipotuzumab or gatrallimab or giloralimab or gilvetmab or girentuximab or glembatumumab or glofitamab or hyaluronidase plus rituximab or hyaluronidase plus trastuzumab or ibritumomab tiuxetan or icrucumab or ieramilimab or ifabotuzumab or iladatuzumab or imalumab or imgatuzumab or immunoliposome or immunotoxin or anatumomab mafenatox or cintredekin besudotox or citatumab bogatox or moxetumomab pasudotox or nacolomab tafenatox or naptumomab estafenatox or taplitumomab paptox or telimomab aritox or indatuximab or indusatumab or inebilizumab or inetumumab or ipilimumab or iratumumab or isatuximab or istiratamab or ivuxolimab or labetuzumab or lacnotuzumab or lacutamab or ladiratuzumab or laprituximab or lenzilumab or lexatumumab or lifastuzumab or lilotomab or lintuzumab or lirilumab or lodapolimab or loncastuximab or lorukafusp alfa or lorvotuzumab or losatuxizumab or lucatumumab or lumiliximab or lumretuzumab or lupartumab or magrolimab or manelimab or mapatumumab or margetuximab or matuzumab or mavezelimab or mezagitamab or milatuzumab or minretumomab or miptenalimab or mirvetuximab or mirzotamab or mitumomab or modakafusp alfa or modotuximab or mogamulizumab or monalizumab).mp.</p> |
| 18 | <p>(deruxtecan or devimistat or dexniguldipine or dexverapamil or dezapelisib or diacetyldianhydrogalactitol or diaspirin crosslinked haemoglobin or didemethoxycurcumin or diglycoaldehyde or dihydroambazone or dilanubicel or dinaciclib or dinaline or discodermolide or disufenton sodium or ditercalinium or docetaxel or dociparstat or dofequidar or dolastatin or domatinostat or dubermatinib or dulanermin or duvelisib or ebifuramin or edelfosine or edicotinib or edotecarin or edotreotide ga 68 or edotreotide lu 177 or edotreotide y 90 or efaprinermin alfa or efatutazone or efgivanermin alfa or efineptakin alfa or eflornithine or eftozanermin alfa or elacestrant or elacridar or elafibranor or elagolix or elesclomol or eleutherobin or elinafide or elisidepsin or eltanexor or empesertib or enasidenib or encequidar or encorafenib or enistimgene setitucel or ensartinib or entasobulin or entinostat or entospletinib or entrectinib or enzastaurin or epertinib or epipodophyllotoxin or erbulozole or erdafitinib or eribulin or erlotinib or erucin or ethazolastone or etidalgide or everolimus or exicorilant or factor AF2 or fadraciclib or falnidamol or fedratinib or felezonexor or fenebrutinib or fenretinide or ferritin antibody i 131 or fetindomide or fibromun or filanesib or filgotinib or fimepinostat or fisogatinib or flavopiridol or flumatinib or fluorocyclopentenylcytosine or forodesine or fosciclopirox or fosquidone or fumitremorgin C or futibatinib or gallium nitrate or galunisertib or gandotinib or gataparsen or gedatolisib or gefitinib or geiparvarin or gencicine or gene expression modulator 231 or ghilanten or giliteritinib or girolline or givinostat or glasdegib or glucopyranosyl lipid A or glycoprotein P inhibitor or golnerminogene pradenovec or golvatinib or goniofufurone or granulocyte macrophage colony stimulating factor vaccine or grifolan or guanazole or gusacitinib or halichondrin B or heat shock protein 27 inhibitor or apatorsen or heat shock protein 90 inhibitor or alvespimycin or celastrol or gambogic acid or gamendazole or ganetespiib or geldanamycin or</p>                                                                                                                                                                                                                                                                                                                                                                                                                                                              |

|           |                                                                                                                                                                                                                                                                                                                                                                                                                                                                                                                                                                                                                                                                                                                                                                                                                                                                                                                                                                                                                                                                                                                                                                                                                                                                                                                                                                                                                                                                                                                                                                                                                                                                                                                                                                                                                                                                                                                                                                                                                                                                                                                                                                                                                                                                                                                                                                                                                                                                                                                                                                                                                                                                                                                                                                 |
|-----------|-----------------------------------------------------------------------------------------------------------------------------------------------------------------------------------------------------------------------------------------------------------------------------------------------------------------------------------------------------------------------------------------------------------------------------------------------------------------------------------------------------------------------------------------------------------------------------------------------------------------------------------------------------------------------------------------------------------------------------------------------------------------------------------------------------------------------------------------------------------------------------------------------------------------------------------------------------------------------------------------------------------------------------------------------------------------------------------------------------------------------------------------------------------------------------------------------------------------------------------------------------------------------------------------------------------------------------------------------------------------------------------------------------------------------------------------------------------------------------------------------------------------------------------------------------------------------------------------------------------------------------------------------------------------------------------------------------------------------------------------------------------------------------------------------------------------------------------------------------------------------------------------------------------------------------------------------------------------------------------------------------------------------------------------------------------------------------------------------------------------------------------------------------------------------------------------------------------------------------------------------------------------------------------------------------------------------------------------------------------------------------------------------------------------------------------------------------------------------------------------------------------------------------------------------------------------------------------------------------------------------------------------------------------------------------------------------------------------------------------------------------------------|
|           | <p>luminespib or onalespib or pimitespib or retaspimycin or tanespimycin or hepsulfam or HER dimerization inhibitor or hexamethylenebisacetamide or hydroxymethylpentamethylmelamine or hydroxyurea or hypericin or hypothemycin or iadademstat or ibrutinib or icotinib or idasanutlin or idecabtagene vicleucel or idelalisib or idetrexed or idronoxil or ilixadencel or ilmofosine or ilorasertib or imaradenant or imatinib or imetelstat or imlatoclox or abagovomab or abituzumab or actimab a or adebrelimab or adecatumumab or alacizumab pegol or alemtuzumab or alsevalimab or amatuximab or amivantamab or andecaliximab or anetumab or apolizumab or aprutumab or aprutumab ixadotin or ascrinvacumab or astegolimab or atezolizumab or avdoralimab or avelumab or axatilimab).mp.</p>                                                                                                                                                                                                                                                                                                                                                                                                                                                                                                                                                                                                                                                                                                                                                                                                                                                                                                                                                                                                                                                                                                                                                                                                                                                                                                                                                                                                                                                                                                                                                                                                                                                                                                                                                                                                                                                                                                                                                             |
| <p>19</p> | <p>(monoclonal antibody J591 or mosunetuzumab or murlentamab or nadunolimab or naratuximab or narnatumab or naxitamab or necitumumab or nesvacumab or nimotuzumab or nivolumab or nurulimab or obinutuzumab or ocaratuzumab or odronextamab or ofatumumab or olaratumab or oleclumab or olinvacimab or omburtamab or onartuzumab or ontuxizumab or onvatilimab or oportuzumab monatox or opucolimab or oregovomab or otlertuzumab or pacmilimab or panitumumab or parsatuzumab or pasotuxizumab or patritumab or pembrolizumab or pemtumomab or pepinemab or pertuzumab or petosemtamab or pidilizumab or pimurutamab or pinatuzumab vedotin or plamotamab or polatuzumab vedotin or praluzatamab or pritumumab or prolgolimab or quavonlimab or racotumomab or radretumab or ragifilimab or ramucirumab or rasdegafusp alfa or relatlimab or retifanlimab or revdofilimab or rilotumumab or ripertamab or rituximab or robatumumab or rolinsatamab or rosmantuzumab or rosopatamab or rovalpituzumab or rovalpituzumab tesirine or sabatolimab or sacituzumab or samalizumab or samrotamab or sasanlimab or selicrelumab or serclutamab or seribantumab or serplulimab or sibrotuzumab or siltuximab or simlukafusp alfa or simtuzumab or sintilimab or sirtratumab or sofituzumab or solitomab or sontuzumab or spartalizumab or sugemalimab or tabalumab or tabituximab or tacatuzumab or tetraxetan yttrium y 90 or tacatuzumab y 90 or tafasitamab or talacotuzumab or talquetamab or tamrintamab or tamtuvetmab or tarextumab or tavolimab or tebotelimab or teclistamab or telisotuzumab or tenatumomab or tepoditamab or teprotumumab or tetulomab tetraxetan lutetium lu 177 or ticilimumab or tidutamab or tigatuzumab or tilogotamab or tilvestamab or timigutuzumab or tinurilimab or tiragolumab or tislelizumab or tisotumab or tomuzotuximab or toralizumab or toripalimab or tositumomab or tovetumab or trastuzumab or ublituximab or ulocuplumab or upifitamab or urabrelimab or urelumab or utomilumab or vadastuximab or vandortuzumab vedotin or vantictumab or vanucizumab or varlilumab or veltuzumab or vesencumab or vibecotamab or vibostolimab or vofatamab or vonlerolizumab or vopratelimab or vorsetuzumab or vulinacimab or xentuzumab or zalifrelimab or zalutumumab or zanidatamab or zanolimumab or zolbetuximab or zuberitamab).mp.</p>                                                                                                                                                                                                                                                                                                                                                                                      |
| <p>20</p> | <p>(inavolisib or inbakicept or incyclinide or indibulin or indisulam or indoximod or ingenol disoxate or ingenol mebutate or inodiftagene vixteplasmid or interferon regulatory factor 2 or intiquinatine or intoplicine or ipafricept or ipatasertib or irosustat or isoswinholide A or ispinesib or itacitinib or itraconazole or ivaltinostat or ivosidenib or ixazomib or kahalalide F or krestin or laetrile or laniquidar or lapachol or lapatinib or lapretolimod or larifan or larotaxel or larotrectinib or laulimalide or lefitolimod or lerociclib or lestaurtinib or letetresgene autoleucel or lexidronam samarium sm 153 or lifileucel or lifirafenib or linperlisib or linrodostat or lisocabtagene maraleucel or litenimod or litronesib or lonafarnib or lonidamine or lorlatinib or ltvax or lurtotecan or maltose tetrapalmitate or masitinib or mavelertinib or mavorixafor or melacine or merbarone or merestinib or methanol extraction residue or metirosine or mevociclib or midostaurin or mifamurtide or milademetan or milataxel or milciclib or miltefosine or mipetresgene autoleucel or mipsagargin or miralimogene ensolisbac or miransertib or mirdametinib or mirostipen or mitazalimab or mitindomide or mitobronitol or mitoflaxone or mitoguazone or mitolactol or mitonafide or mitoquidone or mitotane or mitozolomide or mivavotinib or mivebresib or mivobulin or mocertinib or mocemestrocil or mocetinostat or molibresib or momelotinib or monastrol or mosedipimod or motixafortide or motolimod or mubritinib or mucocin or murizatoclox or mycalamide or myeloablative agent or nabiximols or nadofaragene firadenovec or namodenoson or nanatinostat or napabucasin or naquotinib or nastorazepide or navitoclox or navoximod or nazartinib or necuparanib or nemiralisib or neratinib or netazepide or nevanimibe or nilotinib or niraparib or nirogacestat or nitracrine or nitrocaphane or noscapine or numidargistat or nutlin or obafistat or obatoclox or oblimersen or oblongifolin C or oblongixanthone A or obovatal or obtusilactone A or oclacitinib or olafertinib or olaparib or olaptosed pegol or olcorolimus or olitresgene autoleucel or olmutinib or olutasidenib or olverembatinib or omidubicel or omipalisib or omtriptolide or onatasertib or oncolytic virus or oncolytic adenovirus or enadenotucirev or lontucirev or tasadenoturev or oncolytic herpes virus or canerpatuerev or seprehvir or talimogene laherparepvec or teserpatuerev or oncolytic paramyxovirus or oncolytic parvovirus or oncolytic reovirus or pelareorep or pexastimogene devacirepvec or onfekafusp alfa or ontorpaccept or onvansertib or opaganib or opigolix or oprozomib or oracin or orelabrutinib or</p> |



|    |                                                                                                                                                                                                                                                                                                                                                                                                                                                                                                                                                                                                                                                                                                                                                                                                                                                                                                                                                                                                                                                                                                                                                                                                                                                                                                                                                                                                                                                                                                                                                                                                                                                                                                                                                                                                                                                                                                                                                                                                                                                                                                                                                                                                                                                                                                                                                                                                                                                                                                                                                                                                                                                                                                                                                                                                                                                                                                                                                                                                                                                                                                                           |
|----|---------------------------------------------------------------------------------------------------------------------------------------------------------------------------------------------------------------------------------------------------------------------------------------------------------------------------------------------------------------------------------------------------------------------------------------------------------------------------------------------------------------------------------------------------------------------------------------------------------------------------------------------------------------------------------------------------------------------------------------------------------------------------------------------------------------------------------------------------------------------------------------------------------------------------------------------------------------------------------------------------------------------------------------------------------------------------------------------------------------------------------------------------------------------------------------------------------------------------------------------------------------------------------------------------------------------------------------------------------------------------------------------------------------------------------------------------------------------------------------------------------------------------------------------------------------------------------------------------------------------------------------------------------------------------------------------------------------------------------------------------------------------------------------------------------------------------------------------------------------------------------------------------------------------------------------------------------------------------------------------------------------------------------------------------------------------------------------------------------------------------------------------------------------------------------------------------------------------------------------------------------------------------------------------------------------------------------------------------------------------------------------------------------------------------------------------------------------------------------------------------------------------------------------------------------------------------------------------------------------------------------------------------------------------------------------------------------------------------------------------------------------------------------------------------------------------------------------------------------------------------------------------------------------------------------------------------------------------------------------------------------------------------------------------------------------------------------------------------------------------------|
|    | <p>ortataxel or orvacabtagene autoleucel or osimertinib or oxamflatin or oxodotreotide lu 177 or paclitaxel ceribate or paclitaxel derivative or paclitaxel poliglumex or paclitaxel tocosol or paclitaxel trevatide or pacritinib or palbociclib or palmerolide A or pamiparib or panaxytriol or panduratin A or panobinostat or panulisib or parsacliclib or pasireotide or paxalisib or pegargiminase or pegcantratinib or pegcrisantaspase or pegilodecakin or pegvorhyaluronidase alfa or pelcitolax or pelidotin or pelitinib or pemigatinib or penclomedine or peposertib or peretinoin).mp.</p>                                                                                                                                                                                                                                                                                                                                                                                                                                                                                                                                                                                                                                                                                                                                                                                                                                                                                                                                                                                                                                                                                                                                                                                                                                                                                                                                                                                                                                                                                                                                                                                                                                                                                                                                                                                                                                                                                                                                                                                                                                                                                                                                                                                                                                                                                                                                                                                                                                                                                                                   |
| 21 | <p>(perifosine or pevonedistat or pexidartinib or phenethyl isothiocyanate or phomopsin A or phorboxazole or phyllanthocin or phyllanthoside or picibanil or pictilisib or pilaralisib or pimasetib or pinometostat or pipobroman or pivaloyloxymethyl butyrate or plocabulin or plusonermin or podophyllotoxin or polyerga or ponatinib or poztotinib or pracinostat or pralsetinib or prexasertib or prexigebersen or prospidium or ptilocaulin or pyran copolymer or pyrazine diazohydroxide or quarfloxin or quisinostat or quizartinib or rabacfosadine or rabusertib or radiosensitizing agent or radio-sensitizing agent or bromodeoxycytidine or broxuridine or chloroaluminum phthalocyanine or cloxuridine or crocetin ordecloramidate or doranidazole or efaproxiral or etanidazole or etiopurpurin or fimaporfin or gadolinium texaphyrin or gilvocarcin V or hematoporphyrin derivative or isometronidazole or lemuteporfin or lutetium texaphyrin or merocyanine or misonidazole or motexafin or napavin or nimorazole or nocodazole or normisonidazole or padeliporfin or padoporfin or photofrin I or photofrin II or photosan III or phthalocyanine or pimonidazole or porfimer or redaporfin or senazole or talaporfin or temoporfin or tetrachloroplatinum fast black or tetraphenylporphyrin or tetrasulfophthalocyanine or tirapazamine or tretazicar or troquidazole or verteporfin or radium chloride ra 223 or radotinib or ralimetinib or ranpirnase or rapamycin or ravoxertinib or razoxane or rebastinib or recombinant asparaginase or recombinant interleukin 21 or denenicokin or recombinant methionine gamma lyase or recombinant tumor necrosis factor related apoptosis inducing ligand or refametinib or remetinostat or repotrectinib or resminostat or rezivertinib or rhizoxin or rhodamine 6G or ribociclib or ribonucleotide reductase R2 specific phosphorothioate oligonucleotide or ricolinostat or ridaforolimus or rigosertib or rilimogene galvacirepvec or rilimogene glafolivec or ripretinib or riviciclib or rivogenlecleucel or robaveron or roblitinib or rocakinogene sifuplasmid or rociletinib or roniciclib or roridin A or rosabulin or rosomidnar or rucaparib or ruxolitinib or salinosporamide A or salirasib or samotolisib or samuraciclib or sapanisertib or sapitinib or saracatinib or sarcodictyin A or sarcophytol A or sarcophytol B or sardomozide or satoreotide trizoxetan or savolitinib or Sclerotinia sclerotiorum extract or seclidemstat or selectikine or selinexor or selitrectinib or selpercatinib or selumetinib or seocalcitol or sepantronium bromide or serabelisib or serdemetan or serpentine or shikonin derivative or silmitasertib or simotaxel or simurosertib or siremadlin or sitimagene ceradenovec or sitravatinib or sobuzoxane or solcoderm or sonermin or sonidegib or sonolisib or sparfosic acid or spebrutinib or spirobromine or squamocin or ssioriside or stapuldencel T or starch microsphere or sulfatinib or sulforaphane or sulindac sulfone or sulofenur or suramin or swinholide A or swinholide B).mp.</p> |
| 22 | <p>(tacedinaline or tafluposide or tagraxofusp or talabostat or talactoferrin or taladegib or talazoparib or talirine or taltobulin or tamibarotene or taminadenant or tandutinib or tanshinone IIA or tanurmotide or tariquidar or tarloxotinib or taseslisib or tasidotin or tasisulam or tasonermin or tavokinogene telseplasmid or tazemetostat or tebentafusp or tebocabtagene autoleucel or tecogalan or tefinostat or tegavivint or teglarinad chloride or telaglenastat or teleukin or telomestatin or telotristat or telratolimod or temarotene or temsirolimus or tenalisib or tengonermin or tepotinib or teprasiran or terameprocol or teroxirone or tesetaxel or tetramethylmelamine or tetravil or thioglucose or tian xian wan or tigilanol tiglate or tilomisole or tilsotolimod or timcodar or timonacic derivative or tipifarnib or tirabrutinib or tivantinib or tomivosertib or topsalysin or tosedostat or tozasertib or trametinib or transferrin aldifitox or trichlormethine or trichosanthin or trichostatin A or triciribine or triciribine phosphate or trilaciclib or trimelamol or tubacin or tubulozole or tucatinib or tucidinostat or tucotuzumab celmoleukin or tumor suppressor protein or inhibitor of growth protein 1 or ubiquitin carboxyl terminal hydrolase CYLD or tuvateixib or tylophorine or ulicyclamide or ulipristal or ulithiacyclamide or ulixertinib or umbralisib or upamostat or uproleselan or uprosertib or uzansertib or vaccinia oncolysate or vactosertib or valecobulin or valemestostat or valspodar or varlitinib or vascular targeting agent or anginex or baviximab or crolibulin or denibulin or lexibulin or n acetylcolchicol phosphate or ofranergene obadenovec or ombrabulin or plinabulin or soblidotin or vadimezan or vecabrutinib or vedotin or velimogene aliplasmid or veliparib or vemurafenib or venetoclax or verdinexor or verrucaric acid or verubulin or vesatolimod or virus oncolysate or vismodegib or vistusertib or vocimagene amiretorepvec or volasertib or vorasidenib or vorinostat or voruciclib or vosaroxin or vosilasarm or voxalisib or withaferin A or WW domain containing oxidoreductase or xanthone 4 acetic acid or xevinapant or xiaochaihu tang or xiliertinib or zafiride or zandelisib or zanubrutinib or</p>                                                                                                                                                                                                                                                                                                                                                                                                                                                                                                                                                                                                                                                                                                                                                                                                      |

|    |                                                                                                                                                                                                                                                                                                                                                                                                                                                                                                                                                                                                                                                                                                                                                                                                                                                                                                                                                                                                                                                                                                                                                                                                                                                                                                                                                                                                                                                                                                                                                                                                                                                                                                                                                                                                                                                                                                                                                                                                      |
|----|------------------------------------------------------------------------------------------------------------------------------------------------------------------------------------------------------------------------------------------------------------------------------------------------------------------------------------------------------------------------------------------------------------------------------------------------------------------------------------------------------------------------------------------------------------------------------------------------------------------------------------------------------------------------------------------------------------------------------------------------------------------------------------------------------------------------------------------------------------------------------------------------------------------------------------------------------------------------------------------------------------------------------------------------------------------------------------------------------------------------------------------------------------------------------------------------------------------------------------------------------------------------------------------------------------------------------------------------------------------------------------------------------------------------------------------------------------------------------------------------------------------------------------------------------------------------------------------------------------------------------------------------------------------------------------------------------------------------------------------------------------------------------------------------------------------------------------------------------------------------------------------------------------------------------------------------------------------------------------------------------|
|    | zenocutuzumab or zerumbone or zibotentan or zilascorb or zoledronic acid or zoligratinib or zorifertinib or zosuquidar or zotatifin or zotiraciclib).mp.                                                                                                                                                                                                                                                                                                                                                                                                                                                                                                                                                                                                                                                                                                                                                                                                                                                                                                                                                                                                                                                                                                                                                                                                                                                                                                                                                                                                                                                                                                                                                                                                                                                                                                                                                                                                                                             |
| 23 | (protein tyrosine kinase inhibitor or tyrosine kinase inhibitor or tyrosine protein kinase inhibitor or anaplastic lymphoma kinase inhibitor or bruton tyrosine kinase inhibitor or adaphostin or alofanib or alpha cyanothiocaffaic acid amide or altiratinib or alvespimycin or amivantamab or amuvatinib or alectinib or brigatinib or ceritinib or crizotinib or ensartinib or entrectinib or lorlatinib or repotrectinib or asciminib or avapritinib or axitinib or bafetinib or belizatinib or bemcentinib or bosutinib or brivanib or brivanib alaninate or acalabrutinib or branebrutinib or dasatinib or elsubrutinib or evobrutinib or ibrutinib or orelabrutinib or poseltinib or remibrutinib or rilzabrutinib or spebrutinib or tolebrutinib or vecabrutinib or zanubrutinib or cabozantinib or capmatinib or catequentinib or cediranib or cerdulatinib or cevidoplenib or conteltinib or crenolanib or damnacanthol or decernotinib or defactinib or derazantinib or dovitinib or dubermatinib or edicotinib or elafibranor or emodin or epidermal growth factor receptor kinase inhibitor or erbstatin or focal adhesion kinase inhibitor or Janus kinase inhibitor or baricitinib or brepocitinib or delgocitinib or fedratinib or fosifidancitinib or gusacitinib or ifidancitinib or ilginatinib or itacitinib or izencitinib or abrocitinib or filgotinib or lorpucitinib or momelotinib or ruxolitinib or tofacitinib or upadacitinib or lavendustin A or lazertinib or linsitinib or lorecivivint or mitogen activated protein kinase kinase inhibitor or peficitinib or pexmetinib or protein kinase Syk inhibitor or fostamatinib or lanraplenib or piceatannol or radicicol or recifercept or ritlecitinib or seralutinib or solcitinib or suppressor of cytokine signaling 1 or telatinib or tilvestamab or tyrphostin).mp.                                                                                                                                                |
| 24 | (abscopal effect or bone marrow purging or bone marrow rescue or chemoradiotherap* or chemoradiation or antibody directed enzyme prodrug therap* or chemoembolization or graft versus tumo?r effect or graft versus leuk?emia effect or graft versus lymphoma effect or oncolytic viral therap* or oncolytic virus therap* or target cell destruction or biologic* response modifier therap* or BRM therap* or chimeric antigen receptor immunotherap* or chimeric antigen receptor natural killer cell immunotherap* or chimeric antigen receptor T-cell immunotherap* or CAR immontherap* or CAR T cell therap* or CAR T cell immunotherap* or CAR T therap* or CAR NK cell immunotherap* or CAR NK cell therap* or chimeric antigen receptor T cells or immune checkpoint inhibitor* or immune checkpoint blockade* or radioimmunotherap* or immunoradiotherap* or radiotherap* or bioradiant therap* or hemibody irradiation or irradiation therap* or irradiation treatment* or radiation therap* or radiation treatment* or radio therap* or radiotreatment or beam therap* or blood radiation or brachytherap* or interstitial radiation or radioisotope therap* or radium therap* or electron therap* or gamma irradiation or gamma knife radiosurgery or body radiation or photon beam therap* or proton beam therap* or radioimmunotherap* or stereotactic radiosurgery or teleradiotherap* or bone marrow transplant* or bone marrow cell transfer or bone marrow graft* or bone marrow transfusion* or h?ematopo?etic stem cell* or HSC therap* or HSC transplant* or stem cell transplant* or stem cell based therap* or stem cell therap* or allogeneic stem cell* or autologous stem cell* or peripheral blood stem cell* or allogen?ic HSCT or allogen?ic HSCTs or auto-HSCT or auto-HSCTs or autologous HSCT or autologous HSCTs or tumo?r killing activit* or tumo?r killing effect* or tumo?r killing action* or log cell kill or metastatic* inhibit* or metastas* inhibit*).mp. |
| 25 | 1 or 2 or 3 or 4 or 5 or 6 or 7 or 8 or 9 or 10 or 11 or 12 or 13 or 14 or 15 or 16 or 17 or 18 or 19 or 20 or 21 or 22 or 23 or 24                                                                                                                                                                                                                                                                                                                                                                                                                                                                                                                                                                                                                                                                                                                                                                                                                                                                                                                                                                                                                                                                                                                                                                                                                                                                                                                                                                                                                                                                                                                                                                                                                                                                                                                                                                                                                                                                  |
| 26 | blood vessel parameters/ or arterial stiffness/ or arterial wall thickness/ or artery diameter/ or augmentation index/ or blood vessel diameter/ or carotid-femoral pulse wave velocity/ or endothelial dysfunction/ or artery compliance/ or blood vessel compliance/ or vascular remodeling/ or artery blood flow/ or pulse wave/ or blood vessel function/ or blood vessel reactivity/ or vascular resistance/ or vasoconstriction/ or vasodilatation/ or vascular endothelium/ or artery endothelium/ or artery dilatation/ or blood flow velocity/ or blood vessel capacitance/                                                                                                                                                                                                                                                                                                                                                                                                                                                                                                                                                                                                                                                                                                                                                                                                                                                                                                                                                                                                                                                                                                                                                                                                                                                                                                                                                                                                                 |
| 27 | (tunica intima/ or endothelium, vascular/ or tunica media/ or muscle, smooth, vascular/ or Endothelial Cells/) and (cellular senescence/ or telomere shortening/ or Aging/)                                                                                                                                                                                                                                                                                                                                                                                                                                                                                                                                                                                                                                                                                                                                                                                                                                                                                                                                                                                                                                                                                                                                                                                                                                                                                                                                                                                                                                                                                                                                                                                                                                                                                                                                                                                                                          |
| 28 | arteriosclerosis/ or arteriolosclerosis/ or artery intima proliferation/                                                                                                                                                                                                                                                                                                                                                                                                                                                                                                                                                                                                                                                                                                                                                                                                                                                                                                                                                                                                                                                                                                                                                                                                                                                                                                                                                                                                                                                                                                                                                                                                                                                                                                                                                                                                                                                                                                                             |
| 29 | (endothelial function or endothelial vascular function).mp.                                                                                                                                                                                                                                                                                                                                                                                                                                                                                                                                                                                                                                                                                                                                                                                                                                                                                                                                                                                                                                                                                                                                                                                                                                                                                                                                                                                                                                                                                                                                                                                                                                                                                                                                                                                                                                                                                                                                          |
| 30 | ((vascular* or vasculature or endotherli* or vessel*) adj4 (ag?ing or aged or stiff* or dysfunction* or impair* or deficit* or defect* or change* or alteration* or remode?ling or dilat* or degenerat* or thick* or elasticit* or elastance or distens*)).mp.                                                                                                                                                                                                                                                                                                                                                                                                                                                                                                                                                                                                                                                                                                                                                                                                                                                                                                                                                                                                                                                                                                                                                                                                                                                                                                                                                                                                                                                                                                                                                                                                                                                                                                                                       |
| 31 | ((vascular* or vasculature or endotherli* or blood vessel*) adj (inflammation or senescen* or cell senescence or damage or dyshomeostasis or measurement* or compliance or calcification or reactivity)).mp.                                                                                                                                                                                                                                                                                                                                                                                                                                                                                                                                                                                                                                                                                                                                                                                                                                                                                                                                                                                                                                                                                                                                                                                                                                                                                                                                                                                                                                                                                                                                                                                                                                                                                                                                                                                         |

|    |                                                                                                                                                                                                                                                                                                                                  |
|----|----------------------------------------------------------------------------------------------------------------------------------------------------------------------------------------------------------------------------------------------------------------------------------------------------------------------------------|
| 32 | ((artery or arteries or arteria* or aorta* or aortic*) adj4 (ag?ing or stiff* or thick* or compliance or distens* or wave reflection or reflection index or elasticit* or elastance or defect* or change* or impair* or diameter* or dilat* or measurement* or dysfunction* or alteration* or remode?ling or calcification)).mp. |
| 33 | ((Intima* media* or intimamedia* or tunica intima or tunica media) adj3 thick*).mp.                                                                                                                                                                                                                                              |
| 34 | (pressure wave transmission or pressure wave reflection or pulse pressure or pulse wave velocity or pulse wave analys#s or pulse wave amplitude or arterial pulsatility or flow mediated dilation or blood flow velocit* or arter* flow velocit*).mp.                                                                            |
| 35 | (aortic blood pressure* or aortic pressure* or aortic pulse pressure* or aortic tension* or central aortic blood pressure* or central aortic pressure*).mp.                                                                                                                                                                      |
| 36 | (central BP or arterial BP or aortic BP or (central SBP or arterial SBP or aortic SBP) or (central PP or arterial PP or aortic PP)).mp.                                                                                                                                                                                          |
| 37 | (aortic blood pulse wave* or aortic pulse wave* or aortic tension* or arterial blood pulse wave* or arterial pulse wave* or arterial tension* or central aortic blood pulse wave* or central aortic pulse wave* or carotid to femoral pulse wave* or pulse wave*).mp.                                                            |
| 38 | (augmentation adj (index* or indice*)).mp.                                                                                                                                                                                                                                                                                       |
| 39 | ((augmentation or amplification) adj6 (pressure* or pulse* or wave* or aortic or central)).mp.                                                                                                                                                                                                                                   |
| 40 | 26 or 27 or 28 or 29 or 30 or 31 or 32 or 33 or 34 or 35 or 36 or 37 or 38 or 39                                                                                                                                                                                                                                                 |
| 41 | 25 and 40                                                                                                                                                                                                                                                                                                                        |
| 42 | clinical trial/ or randomized controlled trial/ or randomization/ or single blind procedure/ or double blind procedure/ or crossover procedure/ or placebo/ or prospective study/                                                                                                                                                |
| 43 | (randomi?ed controlled or RCT or randomly allocated or allocated randomly or random allocation or (allocated adj2 random) or (single adj1 blind*) or (double adj1 blind*) or ((treble or triple) adj1 blind*) or placebo*).mp.                                                                                                   |
| 44 | ((cross-sectional or prevalence or disease frequency) adj (analys#s or study or studies or survey)).mp.                                                                                                                                                                                                                          |
| 45 | ((cohort or incidence) adj (analys#s or study or studies or survey)).mp.                                                                                                                                                                                                                                                         |
| 46 | ((follow-up or followup or longitudinal or prospective or retrospective) adj (study or studies)).mp.                                                                                                                                                                                                                             |
| 47 | 42 or 43 or 44 or 45 or 46                                                                                                                                                                                                                                                                                                       |
| 48 | 41 and 47                                                                                                                                                                                                                                                                                                                        |
| 49 | (exp animal/ or exp invertebrate/ or animal.hw. or nonhuman/) not exp human/                                                                                                                                                                                                                                                     |
| 50 | 48 not 49                                                                                                                                                                                                                                                                                                                        |
| 51 | limit 50 to english language                                                                                                                                                                                                                                                                                                     |
| 52 | limit 51 to (editorial or letter or note)                                                                                                                                                                                                                                                                                        |
| 53 | 51 not 52                                                                                                                                                                                                                                                                                                                        |
| 54 | 53 not (case report* or news or newspaper*).mp,pt.                                                                                                                                                                                                                                                                               |
| 55 | limit 54 to conference abstract                                                                                                                                                                                                                                                                                                  |
| 56 | 54 not 55                                                                                                                                                                                                                                                                                                                        |
| 57 | limit 56 to conference abstracts                                                                                                                                                                                                                                                                                                 |
| 58 | 56 not 57                                                                                                                                                                                                                                                                                                                        |

| #   | Query                                                                                                                                                                                                                                                                                                                                                                                                                                                                                                                                                                                                                                                                                                                                                                                                                                                                                                               |
|-----|---------------------------------------------------------------------------------------------------------------------------------------------------------------------------------------------------------------------------------------------------------------------------------------------------------------------------------------------------------------------------------------------------------------------------------------------------------------------------------------------------------------------------------------------------------------------------------------------------------------------------------------------------------------------------------------------------------------------------------------------------------------------------------------------------------------------------------------------------------------------------------------------------------------------|
| S15 | S11 OR S13<br>Limiters - Publication Year: 1990-2020; English Language; Exclude MEDLINE records                                                                                                                                                                                                                                                                                                                                                                                                                                                                                                                                                                                                                                                                                                                                                                                                                     |
| S14 | S11 OR S13                                                                                                                                                                                                                                                                                                                                                                                                                                                                                                                                                                                                                                                                                                                                                                                                                                                                                                          |
| S13 | S5 AND S12                                                                                                                                                                                                                                                                                                                                                                                                                                                                                                                                                                                                                                                                                                                                                                                                                                                                                                          |
| S12 | (( (primary care or primary health care or primary healthcare or primary health system* or primary medical service* or primary medical care or (first-level healthcare or first-level health care or first-level health system* or first-level health facilit* or local health system* or local health care or local healthcare or local-level health*)) N4 (accessibility or availability)) ) OR ( ((primary care or primary health care or primary healthcare or primary health system* or primary medical service* or primary medical care or (first-level healthcare or first-level health care or first-level health system* or first-level health facilit* or local health system* or local health care or local healthcare or local-level health*)) N0 (need* or demand*)) ) OR ( ((primary or first-level or local) adj3 health* adj3 (clinic* or center* or centre* or setting*)) N2 (need* or demand*)) ) |
| S11 | S9 AND S10                                                                                                                                                                                                                                                                                                                                                                                                                                                                                                                                                                                                                                                                                                                                                                                                                                                                                                          |
| S10 | (readiness or preparedness or capacity or quality improvement or quality of Improvement)                                                                                                                                                                                                                                                                                                                                                                                                                                                                                                                                                                                                                                                                                                                                                                                                                            |
| S9  | S5 AND S8                                                                                                                                                                                                                                                                                                                                                                                                                                                                                                                                                                                                                                                                                                                                                                                                                                                                                                           |
| S8  | S6 OR S7                                                                                                                                                                                                                                                                                                                                                                                                                                                                                                                                                                                                                                                                                                                                                                                                                                                                                                            |
| S7  | (( (primary health system or primary health service or primary healthcare system or primary health care system or primary healthcare service or primary health care service or primary medical service delivery or primary medical care service or primary care service or primary care system) ) OR ( (first-level healthcare or first-level health care or first-level health system* or first-level health facilit* or local health system* or local health care or local healthcare or local-level health*)) ) OR ( ((primary or first-level or local) adj3 health* adj3 (clinic* or center* or centre* or setting*)) )                                                                                                                                                                                                                                                                                         |
| S6  | (MH "Primary Health Care") OR (MH "Health Care Delivery")                                                                                                                                                                                                                                                                                                                                                                                                                                                                                                                                                                                                                                                                                                                                                                                                                                                           |
| S5  | S1 OR S2 OR S3 OR S4                                                                                                                                                                                                                                                                                                                                                                                                                                                                                                                                                                                                                                                                                                                                                                                                                                                                                                |
| S4  | (( (diastolic pressure or systolic pressure or blood pressure or cardiometabolic syndrome*) ) OR ( (copd or asthma or renal disease* or kidney disease*)) )                                                                                                                                                                                                                                                                                                                                                                                                                                                                                                                                                                                                                                                                                                                                                         |
| S3  | (( (cardiovascular disease* or coronary artery disease* or myocardial isch?emia or myocardial infarct* or pulmonary disease* or chronic obstructive pulmonary or chronic obstructive lung or chronic obstructive respiratory or diabetes or coronary heart disease* or neoplasm* or cancer*) ) OR ( (hypertension or hypertriglycerid?emi* or hyper triglycerid?emi* or high triglyceride* or high cholesterol or hypercholesterol?emi* or hyperlipid?emia* or hyperlipidemi*)) )                                                                                                                                                                                                                                                                                                                                                                                                                                   |
| S2  | (( (chronic disease* or chronic disorder* or chronic* sick* or chronic health condition* or chronic medical condition* or chronic* ill* or long term condition* or multimorbidit* or mult imorbidit*)) ) OR ( (non-communicable disease* or non-infectious disease* or noncommunicable disease* or noninfectious disease*)) )                                                                                                                                                                                                                                                                                                                                                                                                                                                                                                                                                                                       |
| S1  | (MH "Chronic Disease") OR (MH "Noncommunicable Diseases") OR (MH "Chronic Pain")                                                                                                                                                                                                                                                                                                                                                                                                                                                                                                                                                                                                                                                                                                                                                                                                                                    |

## CINAHL Search

**Database(s):** APA PsycInfo  
**Search Strategy:**

| #  | Searches                                                                                                                                                                                                                                                                                                                                                                                         | Results |
|----|--------------------------------------------------------------------------------------------------------------------------------------------------------------------------------------------------------------------------------------------------------------------------------------------------------------------------------------------------------------------------------------------------|---------|
| 1  | chronic illness/ or chronic fatigue syndrome/ or chronic pain/                                                                                                                                                                                                                                                                                                                                   | 27358   |
| 2  | (chronic disease* or chronic disorder* or chronic* sick* or chronic health condition* or chronic medical condition* or chronic* ill* or long term condition* or multimorbidit* or mult imorbidit*).mp.                                                                                                                                                                                           | 48956   |
| 3  | (non-communicable disease* or non-infectious disease* or noncommunicable disease* or noninfectious disease*).mp.                                                                                                                                                                                                                                                                                 | 1052    |
| 4  | (cardiovascular disease* or coronary artery disease* or myocardial isch?emia or myocardial infarct* or pulmonary disease* or chronic obstructive pulmonary or chronic obstructive lung or chronic obstructive respiratory or diabetes or coronary heart disease* or neoplasm* or cancer*).mp.                                                                                                    | 121105  |
| 5  | (hypertension or hypertriglycerid?emi* or hyper triglycerid?emi* or high triglyceride* or high cholesterol or hypercholesterol?emi* or hyperlipid?emia* or hyperlipidemi*).mp.                                                                                                                                                                                                                   | 20201   |
| 6  | (diastolic pressure or systolic pressure or blood pressure or cardiometabolic syndrome*).mp.                                                                                                                                                                                                                                                                                                     | 24127   |
| 7  | (copd or asthma or renal disease* or kidney disease*).mp.                                                                                                                                                                                                                                                                                                                                        | 13056   |
| 8  | 1 or 2 or 3 or 4 or 5 or 6 or 7                                                                                                                                                                                                                                                                                                                                                                  | 207978  |
| 9  | primary health care/                                                                                                                                                                                                                                                                                                                                                                             | 18474   |
| 10 | health care delivery/                                                                                                                                                                                                                                                                                                                                                                            | 20844   |
| 11 | (primary health system or primary health service or primary healthcare system or primary health care system or primary healthcare service or primary health care service or primary medical service delivery or primary medical care service or primary care service or primary care system).mp.                                                                                                 | 511     |
| 12 | (first-level healthcare or first-level health care or first-level health system* or first-level health facilit* or local health system* or local health care or local healthcare or local-level health*).mp.                                                                                                                                                                                     | 338     |
| 13 | ((primary or first-level or local) adj3 health* adj3 (clinic* or center* or centre* or setting*)).mp.                                                                                                                                                                                                                                                                                            | 2322    |
| 14 | 9 or 10 or 11 or 12                                                                                                                                                                                                                                                                                                                                                                              | 38723   |
| 15 | 8 and 14                                                                                                                                                                                                                                                                                                                                                                                         | 4987    |
| 16 | (readiness or preparedness or capacity or quality improvement or quality of Improvement).mp.                                                                                                                                                                                                                                                                                                     | 118317  |
| 17 | 15 and 16                                                                                                                                                                                                                                                                                                                                                                                        | 312     |
| 18 | ((primary care or primary health care or primary healthcare or primary health system* or primary medical service* or primary medical care or (first-level healthcare or first-level health care or first-level health system* or first-level health facilit* or local health system* or local health care or local healthcare or local-level health*)) adj5 (accessibility or availability)).mp. | 148     |
| 19 | 8 and 18                                                                                                                                                                                                                                                                                                                                                                                         | 19      |
| 20 | ((primary care or primary health care or primary healthcare or primary health system* or primary medical service* or primary medical care or (first-level healthcare or first-level health care or first-level health system* or first-level health facilit* or local health system* or local health care or local healthcare or local-level health*)) adj (need* or demand*).mp.                | 290     |
| 21 | 8 and 20                                                                                                                                                                                                                                                                                                                                                                                         | 55      |
| 22 | ((primary or first-level or local) adj3 health* adj3 (clinic* or center* or centre* or setting*) adj3 (need* or demand*)).mp.                                                                                                                                                                                                                                                                    | 17      |
| 23 | 8 and 22                                                                                                                                                                                                                                                                                                                                                                                         | 2       |
| 24 | 17 or 19 or 21 or 23                                                                                                                                                                                                                                                                                                                                                                             | 387     |

|    |                                                                                          |     |
|----|------------------------------------------------------------------------------------------|-----|
| 25 | limit 24 to english language                                                             | 380 |
| 26 | limit 25 to yr="1990 -Current"                                                           | 380 |
| 27 | limit 26 to ("column/opinion" or "comment/reply" or dissertation or editorial or letter) | 41  |
| 28 | 26 not 27                                                                                | 339 |

## Scopus

### Search Strategy:

(((((TITLE-ABS-KEY(("chronic disease\*" OR "chronic disorder\*" OR "chronic\* sick\*" OR "chronic health condition\*" OR "chronic medical condition\*" OR "chronic\* ill\*" OR "long term condition\*" OR multimorbidit\* OR "mult imorbidit\*")))) OR (TITLE-ABS-KEY(("non-communicable disease\*" OR "non-infectious disease\*" OR "noncommunicable disease\*" OR "noninfectious disease\*")))) OR (TITLE-ABS-KEY(("cardiovascular disease\*" OR "coronary artery disease\*" OR "myocardial isch?emia" OR "myocardial infarct\*" OR "pulmonary disease\*" OR "chronic obstructive pulmonary" OR "chronic obstructive lung" OR "chronic obstructive respiratory" OR diabetes OR "coronary heart disease\*" OR neoplasm\* OR cancer\*))) OR (TITLE-ABS-KEY((hypertension OR hypertriglycerid?emi\* OR "hyper triglycerid?emi\*" OR "high triglyceride\*" OR "high cholesterol" OR hypercholesterol?emi\* OR hyperlipid?emia\* OR hyperlipidemi\*))) OR (TITLE-ABS-KEY(("diastolic pressure" OR "systolic pressure" OR "blood pressure" OR "cardiometabolic syndrome\*")))) OR (TITLE-ABS-KEY((copd OR asthma OR "renal disease\*" OR "kidney disease\*")))) AND ((TITLE-ABS-KEY(("primary health system" OR "primary health service" OR "primary healthcare system" OR "primary health care system" OR "primary healthcare service" OR "primary health care service" OR "primary medical service delivery" OR "primary medical care service" OR "primary care service" OR "primary care system")))) OR (TITLE-ABS-KEY(("first-level healthcare" OR "first-level health care" OR "first-level health system\*" OR "first-level health facilit\*" OR "local health system\*" OR "local health care" OR "local healthcare" OR "local-level health\*")))) OR (TITLE-ABS-KEY((primary OR "first-level" OR local) W/2 health\* W/2 (clinic\* OR center\* OR centre\* OR setting\*)))) AND (TITLE-ABS-KEY((readiness OR preparedness OR capacity OR "quality improvement" OR "quality of Improvement")))) OR (((TITLE-ABS-KEY(("chronic disease\*" OR "chronic disorder\*" OR "chronic\* sick\*" OR "chronic health condition\*" OR "chronic medical condition\*" OR "chronic\* ill\*" OR "long term condition\*" OR multimorbidit\* OR "mult imorbidit\*")))) OR (TITLE-ABS-KEY(("non-communicable disease\*" OR "non-infectious disease\*" OR "noncommunicable disease\*" OR "noninfectious disease\*")))) OR (TITLE-ABS-KEY(("cardiovascular disease\*" OR "coronary artery disease\*" OR "myocardial isch?emia" OR "myocardial infarct\*" OR "pulmonary disease\*" OR "chronic obstructive pulmonary" OR "chronic obstructive lung" OR "chronic obstructive respiratory" OR diabetes OR "coronary heart disease\*" OR neoplasm\* OR cancer\*))) OR (TITLE-ABS-KEY((hypertension OR hypertriglycerid?emi\* OR "hyper triglycerid?emi\*" OR "high triglyceride\*" OR "high cholesterol" OR hypercholesterol?emi\* OR hyperlipid?emia\* OR hyperlipidemi\*))) OR (TITLE-ABS-KEY(("diastolic pressure" OR "systolic pressure" OR "blood pressure" OR "cardiometabolic syndrome\*")))) OR (TITLE-ABS-KEY((copd OR asthma OR "renal disease\*" OR "kidney disease\*")))) AND (TITLE-ABS-KEY((( "primary care" OR "primary health care" OR "primary healthcare" OR "primary health system\*" OR "primary medical service\*" OR "primary medical care" OR "first-level healthcare" OR "first-level health care" OR "first-level health system\*" OR "first-level health facilit\*" OR "local health system\*" OR "local health care" OR "local healthcare" OR "local-level

health\*") W/4 ( accessibility OR availability )))) OR ((( TITLE-ABS-KEY ( ("chronic  
 disease\*" OR "chronic disorder\*" OR "chronic\* sick\*" OR "chronic health  
 condition\*" OR "chronic medical condition\*" OR "chronic\* ill\*" OR "long term  
 condition\*" OR multimorbidit\* OR "mult imorbidit\*")) OR ( TITLE-ABS-KEY ( ("non-  
 communicable disease\*" OR "non-infectious disease\*" OR "noncommunicable  
 disease\*" OR "noninfectious disease\*")) OR ( TITLE-ABS-KEY ( ("cardiovascular  
 disease\*" OR "coronary artery disease\*" OR "myocardial isch?emia" OR "myocardial  
 infarct\*" OR "pulmonary disease\*" OR "chronic obstructive pulmonary" OR "chronic obstructive  
 lung" OR "chronic obstructive respiratory" OR diabetes OR "coronary heart  
 disease\*" OR neoplasm\* OR cancer\* )) OR ( TITLE-ABS-  
 KEY ( ( hypertension OR hypertriglycerid?emi\* OR "hyper triglycerid?emi\*" OR "high  
 triglyceride\*" OR "high  
 cholesterol" OR hypercholesterol?emi\* OR hyperlipid?emia\* OR hyperlipidemi\* )) OR ( TIT  
 LE-ABS-KEY ( ( "diastolic pressure" OR "systolic pressure" OR "blood  
 pressure" OR "cardiometabolic syndrome\*")) OR ( TITLE-ABS-  
 KEY ( ( copd OR asthma OR "renal disease\*" OR "kidney disease\*")) ) AND ( TITLE-ABS-  
 KEY ( ( ( "primary care" OR "primary health care" OR "primary healthcare" OR "primary health  
 system\*" OR "primary medical service\*" OR "primary medical care" OR "first-level  
 healthcare" OR "first-level health care" OR "first-level health system\*" OR "first-level health  
 facilit\*" OR "local health system\*" OR "local health care" OR "local healthcare" OR "local-level  
 health\*" ) W/0 ( need\* OR demand\* )))) OR ((( TITLE-ABS-KEY ( ("chronic  
 disease\*" OR "chronic disorder\*" OR "chronic\* sick\*" OR "chronic health  
 condition\*" OR "chronic medical condition\*" OR "chronic\* ill\*" OR "long term  
 condition\*" OR multimorbidit\* OR "mult imorbidit\*")) OR ( TITLE-ABS-KEY ( ("non-  
 communicable disease\*" OR "non-infectious disease\*" OR "noncommunicable  
 disease\*" OR "noninfectious disease\*")) OR ( TITLE-ABS-KEY ( ("cardiovascular  
 disease\*" OR "coronary artery disease\*" OR "myocardial isch?emia" OR "myocardial  
 infarct\*" OR "pulmonary disease\*" OR "chronic obstructive pulmonary" OR "chronic obstructive  
 lung" OR "chronic obstructive respiratory" OR diabetes OR "coronary heart  
 disease\*" OR neoplasm\* OR cancer\* )) OR ( TITLE-ABS-  
 KEY ( ( hypertension OR hypertriglycerid?emi\* OR "hyper triglycerid?emi\*" OR "high  
 triglyceride\*" OR "high  
 cholesterol" OR hypercholesterol?emi\* OR hyperlipid?emia\* OR hyperlipidemi\* )) OR ( TIT  
 LE-ABS-KEY ( ( "diastolic pressure" OR "systolic pressure" OR "blood  
 pressure" OR "cardiometabolic syndrome\*")) OR ( TITLE-ABS-  
 KEY ( ( copd OR asthma OR "renal disease\*" OR "kidney disease\*")) ) AND ( TITLE-ABS-  
 KEY ( ( ( primary OR "first-  
 level" OR local ) W/2 health\* W/2 ( clinic\* OR center\* OR centre\* OR setting\* ) W/2 ( need  
 \* OR demand\* )))) ) AND ( LIMIT-  
 TO ( LANGUAGE , "English" ) ) AND ( EXCLUDE ( DOCTYPE , "ch" ) OR EXCLUDE ( DOC  
 TYPE , "no" ) OR EXCLUDE ( DOCTYPE , "bk" ) OR EXCLUDE ( DOCTYPE , "ed" ) ) AND  
 ( EXCLUDE ( SUBJAREA , "AGRI" ) OR EXCLUDE ( SUBJAREA , "CENG" ) OR EXCLUD  
 E ( SUBJAREA , "ARTS" ) OR EXCLUDE ( SUBJAREA , "BUSI" ) OR EXCLUDE ( SUBJAR  
 EA , "EART" ) OR EXCLUDE ( SUBJAREA , "VETE" ) ) View less

**Table S2. A list of the excluded studies and reasons for their exclusion**

| SL | Study                                                                                                                                                                                                                                                                                                                                                                                              | Reason for exclusion                                    |
|----|----------------------------------------------------------------------------------------------------------------------------------------------------------------------------------------------------------------------------------------------------------------------------------------------------------------------------------------------------------------------------------------------------|---------------------------------------------------------|
| 01 | Abolhassani N, Santos-Eggimann B, Chiolero A, Santschi V, Henchoz Y. Readiness to accept health information and communication technologies: A population-based survey of community-dwelling older adults. <i>International Journal of Medical Informatics</i> 2019; <b>130</b> : 103950.                                                                                                           | Not relevant to the theme for review                    |
| 02 | Acton KJ, Shields R, Rith-Najarian S, et al. Applying the diabetes quality improvement project indicators in the Indian Health Service primary care setting. <i>Diabetes Care</i> ; <b>24</b> (1): 22-6.                                                                                                                                                                                           | Inadequate or inappropriate results                     |
| 03 | Ahmed S, Chowdhury MA, Khan MA, Huq NL, Naheed A. Access to primary health care for acute vascular events in rural low income settings: a mixed methods study. <i>BMC Health Services Research</i> ; <b>17</b> (1): 47.                                                                                                                                                                            | Inadequate or inappropriate results                     |
| 04 | Allenby A, Kinsman L, Tham R, Symons J, Jones M, Campbell S. The quality of cardiovascular disease prevention in rural primary care. <i>Australian Journal of Rural Health</i> ; <b>24</b> (2): 92-8.                                                                                                                                                                                              | Inadequate or inappropriate results                     |
| 05 | Armour CL, Reddel HK, Lemay KS, et al. Feasibility and Effectiveness of an Evidence-Based Asthma Service in Australian Community Pharmacies: A Pragmatic Cluster Randomized Trial. <i>Journal of Asthma</i> 2013; <b>50</b> (3): 302-9.                                                                                                                                                            | Not relevant to the theme for review                    |
| 06 | Alzubaidi HT, Chandir S, Hasan S, McNamara K, Cox R, Krass I. Diabetes and cardiovascular disease risk screening model in community pharmacies in a developing primary healthcare system: A feasibility study.                                                                                                                                                                                     | Inadequate or inappropriate results                     |
| 07 | Ahmedov M, Green J, Azimov R, Avezova G, Inakov S, Mamatkulov B. Addressing the challenges of improving primary care quality in Uzbekistan: a qualitative study of chronic heart failure management. <i>Health Policy &amp; Planning</i> ; <b>28</b> (5): 458-66.                                                                                                                                  | Inadequate or inappropriate results                     |
| 08 | Aryal BK, Daud M, Thapa A, Mahotra A, Ale Magar S, Malla CK. Assessment of Health Facilities for Implementation of Non-communicable Disease Package. <i>Journal of Nepal Health Research Council</i> ; <b>16</b> (2): 149-55.                                                                                                                                                                      | Combined data on primary and secondary healthcare level |
| 09 | Banasiak NC. Implementation of the Asthma Control Test in Primary Care to Improve Patient Outcomes. <i>Journal of Pediatric Healthcare</i> 2018; <b>32</b> (6): 591-9.                                                                                                                                                                                                                             | Not relevant to the theme for review                    |
| 10 | Barcelos MRB, Nunes BP, Duro SMS, et al. Utilization of Breast Cancer Screening in Brazil: An External Assessment of Primary Health Care Access and Quality Improvement Program.                                                                                                                                                                                                                   | Not relevant to the theme for review                    |
| 11 | Bello AK, Ronksley PE, Tangri N, et al. Quality of Chronic Kidney Disease Management in Canadian Primary Care. <i>JAMA Network Open</i> ; <b>2</b> (9): e1910704.                                                                                                                                                                                                                                  | Inadequate or inappropriate results                     |
| 12 | Baeza JI, Fitzgerald L, McGivern G. Change capacity: the route to service improvement in primary care. <i>Quality in Primary Care</i> ; <b>16</b> (6): 401-7.                                                                                                                                                                                                                                      | Inadequate or inappropriate results                     |
| 13 | Bawazir AA, Al-Surimi K, Suwaidan SD, AlShehri AM, AlFarhan AI, Aboufotouh MA. Capacity and readiness of primary health care centers for implementation of the basic strategy for prevention and control of non-communicable diseases in Saudi Arabia. A case study from the Ministry of National Guard-Health Affairs, Riyadh, Saudi Arabia. <i>Saudi Medical Journal</i> ; <b>40</b> (6): 614-8. | Inappropriate study type (n=1)                          |
| 14 | Boehmer KR, Kyriacou M, Behnken E, Branda M, Montori VM. Patient capacity for self-care in the medical record of patients with                                                                                                                                                                                                                                                                     | Not relevant to the theme for review                    |



|    |                                                                                                                                                                                                                                                                          |                                                         |
|----|--------------------------------------------------------------------------------------------------------------------------------------------------------------------------------------------------------------------------------------------------------------------------|---------------------------------------------------------|
|    | chronic conditions: a mixed-methods retrospective study. <i>BMC family practice</i> 2018; <b>19</b> (1): 164.                                                                                                                                                            |                                                         |
| 15 | Bindman AB, Grumbach K, Osmond D, Vranizan K, Stewart AL. Primary care and receipt of preventive services.                                                                                                                                                               | Inadequate or inappropriate results                     |
| 16 | Birabwa C, Bwambale MF, Waiswa P, Mayega RW. Quality and barriers of outpatient diabetes care in rural health facilities in Uganda - a mixed methods study. <i>BMC Health Services Research</i> ; <b>19</b> (1): 706.                                                    | Combined data on primary and secondary healthcare level |
| 17 | Brownson CA, Miller D, Crespo R, et al. A quality improvement tool to assess self-management support in primary care. <i>Joint Commission Journal on Quality &amp; Patient Safety</i> ; <b>33</b> (7): 408-16.                                                           | Inadequate or inappropriate results                     |
| 18 | Casalino LP, Wu FM, Ryan AM, et al. Independent practice associations and physician-hospital organizations can improve care management for smaller practices. <i>Health Affairs</i> ; <b>32</b> (8): 1376-82.                                                            | Inadequate or inappropriate results                     |
| 19 | Chavannes NH. Integrated chronic obstructive pulmonary disease management in primary care. <i>Disease Management &amp; Health Outcomes</i> 2008; <b>16</b> (5): 315-8.                                                                                                   | Inadequate or inappropriate results                     |
| 20 | Chen M, Patel T, Chang F. The impact of a primary care, pharmacist-driven intervention in patients with chronic non-cancer pain-A pilot study. <i>Pharmacy</i> 2020; <b>8</b> (8): 113.                                                                                  | Not relevant to the theme for review                    |
| 21 | Chen XRC, Leung SH, Li YC. Chronic Obstructive Pulmonary Disease (COPD) management in the community: how could primary care team contribute? <i>BMC family practice</i> 2020; <b>21</b> (1): 184.                                                                        | Not relevant to the theme for review                    |
| 22 | Collins S. Primary care shortages: Strengthening this sector is urgently needed, now and in preparation for healthcare reform. <i>American Health and Drug Benefits</i> 2012; <b>5</b> (1): 40-7.                                                                        | Inadequate or inappropriate results                     |
| 23 | Chen LW, Nguyen AT, Jacobson J, Palm D. Assessment of workforce capacity for Local Health Departments in Nebraska: a perspective from public health programmatic areas. <i>Journal of Public Health Management &amp; Practice</i> ; <b>18</b> (6): 595-601.              | Not relevant to the theme for review                    |
| 24 | Chen LM, Sakshaug JW, Miller DC, Rosland A-M, Hollingsworth J. The association among medical home readiness, quality, and care of vulnerable patients. <i>Am J Manag Care</i> 2015; <b>21</b> (8): e480-e6.                                                              | Inadequate or inappropriate results                     |
| 25 | Day A, Oldroyd C, Godfrey S, Quinn T. Availability of cardiac equipment in general practice premises in a cardiac network: A survey. <i>British Journal of Cardiology</i> 2008; <b>15</b> (3): 141-4.                                                                    | Inadequate or inappropriate results                     |
| 26 | Deckard GJ, Borkowski N, Diaz D, Sanchez C, Boissette SA. Improving timeliness and efficiency in the referral process for safety net providers: Application of the lean six sigma methodology. <i>Journal of Ambulatory Care Management</i> 2010; <b>33</b> (2): 124-30. | Not relevant to the theme for review                    |
| 27 | Depatie A, Bigbee JL. Rural Older Adult Readiness to Adopt Mobile Health Technology: A Descriptive Study. <i>Online Journal of Rural Nursing &amp; Health Care</i> 2015; <b>15</b> (1): 150-84.                                                                          | Inadequate or inappropriate results                     |
| 28 | Due TD, Thorsen T, Waldorff FB, Kousgaard MB. Role enactment of facilitation in primary care - a qualitative study. <i>BMC Health Services Research</i> ; <b>17</b> (1): 593.                                                                                            | Not relevant to the theme for review                    |
| 29 | Fleck S. Unified health services and family focused primary care.                                                                                                                                                                                                        | Not relevant to the theme for review                    |
| 30 | Foo KM, Sundram M, Legido-Quigley H. Facilitators and barriers of managing patients with multiple chronic conditions in the community: a qualitative study. <i>BMC public health</i> 2020; <b>20</b> (1): 273.                                                           | Inadequate or inappropriate results                     |
| 31 | Fortin M, Chouinard M-C, Diallo BB, Bouhali T. Integration of chronic disease prevention and management services into primary care (PR1MaC): findings from an embedded qualitative study. <i>BMC Family Practice</i> 2019; <b>20</b> (1): 1-8.                           | Inadequate or inappropriate results                     |

|    |                                                                                                                                                                                                                                                                                                                         |                                                         |
|----|-------------------------------------------------------------------------------------------------------------------------------------------------------------------------------------------------------------------------------------------------------------------------------------------------------------------------|---------------------------------------------------------|
| 32 | Fox CH, Brooks A, Zayas LE, McClellan W, Murray B. Primary care physicians' knowledge and practice patterns in the treatment of chronic kidney disease: an Upstate New York Practice-based Research Network (UNYNET) study. <i>Journal of the American Board of Family Medicine: JABFM</i> ; <b>19</b> (1): 54-61.      | Not relevant to the theme for review                    |
| 33 | Fuchs S, Jaffe DM, Christoffel KK. Pediatric emergencies in office practices: prevalence and office preparedness. <i>Pediatrics</i> ; <b>83</b> (6): 931-9.                                                                                                                                                             | Not relevant to the theme for review                    |
| 34 | Furno M. The primary role: How the availability of primary care physicians affects diabetes care management.                                                                                                                                                                                                            | Inadequate or inappropriate results                     |
| 35 | Galaviz KI, Narayan KMV, Manders OC, et al. The Public Health Leadership and Implementation Academy for Noncommunicable Diseases. <i>Preventing Chronic Disease</i> ; <b>16</b> : E49.                                                                                                                                  | Inadequate or inappropriate results                     |
| 36 | Ghimire U, Shrestha N, Adhikari B, Mehata S, Pokharel Y, Mishra SR. Health system's readiness to provide cardiovascular, diabetes and chronic respiratory disease related services in Nepal: analysis using 2015 health facility survey. <i>BMC Public Health</i> 2020; <b>20</b> (1): 1163.                            | Combined data on primary and secondary healthcare level |
| 37 | Gerbert B, Maurer T, Berger T, et al. Primary care physicians as gatekeepers in managed care. Primary care physicians' and dermatologists' skills at secondary prevention of skin cancer. <i>Archives of Dermatology</i> ; <b>132</b> (9): 1030-8.                                                                      | Inadequate or inappropriate results                     |
| 38 | Gordon NP, Hornbrook MC. Older adults' readiness to engage with eHealth patient education and self-care resources: a cross-sectional survey. <i>BMC health services research</i> 2018; <b>18</b> (1): 220.                                                                                                              | Not relevant to the theme for review                    |
| 39 | Goytia EJ, Rapkin B, Weiss ES, Golub D, Guzman V, O'Connor M. Readiness and capacity of librarians in public libraries to implement a breast cancer outreach and screening campaign in medically underserved communities. <i>Cancer control : journal of the Moffitt Cancer Center</i> 2005; <b>12 Suppl 2</b> : 13-20. | Not relevant to the theme for review                    |
| 40 | Gujral UP, Johnson L, Nielsen J, et al. Preparedness cycle to address transitions in diabetes care during the COVID-19 pandemic and future outbreaks. <i>BMJ Open Diabetes Research &amp; Care</i> 2020; <b>8</b> (1): 07.                                                                                              | Not relevant to the theme for review                    |
| 41 | Haileamlak A. Preparedness to Respond to the Ever-increasing Cancer Cases. <i>Ethiopian Journal of Health Sciences</i> ; <b>25</b> (4): 293-4.                                                                                                                                                                          | Not relevant to the theme for review                    |
| 42 | Hanusaiik N, O'Loughlin JL, Kishchuk N, Paradis G, Cameron R. Organizational capacity for chronic disease prevention: a survey of Canadian public health organizations. <i>European Journal of Public Health</i> ; <b>20</b> (2): 195-201.                                                                              | Combined data on primary and secondary healthcare level |
| 43 | Henderson KH, DeWalt DA, Halladay J, et al. Organizational Leadership and Adaptive Reserve in Blood Pressure Control: The Heart Health NOW Study. <i>Annals of Family Medicine</i> ; <b>16</b> (Suppl 1): S29-S34.                                                                                                      | Inadequate or inappropriate results                     |
| 44 | Heslop L, Power R, Cranwell K. Building workforce capacity for complex care coordination: a function analysis of workflow activity. <i>Human Resources for Health [Electronic Resource]</i> ; <b>12</b> : 52.                                                                                                           | Not relevant to the theme for review                    |
| 45 | Geboers et al.                                                                                                                                                                                                                                                                                                          | Inadequate or inappropriate results                     |
| 46 | Inrig SJ, Higashi RT, Tiro JA, Argenbright KE, Lee SJ. Assessing local capacity to expand rural breast cancer screening and patient navigation: An iterative mixed-method tool. <i>Evaluation and program planning</i> 2017; <b>61</b> : 113-24.                                                                        | Inadequate or inappropriate results                     |
| 47 | Jayanna K, Swaroop N, Kar A, et al. Designing a comprehensive Non-Communicable Diseases (NCD) programme for hypertension                                                                                                                                                                                                | Inadequate or inappropriate results                     |

|    |                                                                                                                                                                                                                                                                                                                               |                                                         |
|----|-------------------------------------------------------------------------------------------------------------------------------------------------------------------------------------------------------------------------------------------------------------------------------------------------------------------------------|---------------------------------------------------------|
|    | and diabetes at primary health care level: evidence and experience from urban Karnataka, South India. <i>BMC Public Health</i> 2019; <b>19</b> (1): 409.                                                                                                                                                                      |                                                         |
| 48 | Jigjidsuren A, Byambaa T, Altangerel E, et al. Free and universal access to primary healthcare in Mongolia: the service availability and readiness assessment. <i>BMC Health Services Research</i> ; <b>19</b> (1): 129.                                                                                                      | Inadequate or inappropriate results                     |
| 49 | Jin Y, Zhu W, Yuan B, Meng Q. Impact of health workforce availability on health care seeking behavior of patients with diabetes mellitus in China.                                                                                                                                                                            | Combined data on primary and secondary healthcare level |
| 50 | Joffres C, Heath S, Farquharson J, et al. Defining and operationalizing capacity for heart health promotion in Nova Scotia, Canada. <i>Health Promotion International</i> 2004; <b>19</b> (1): 39-49.                                                                                                                         | Not relevant to the theme for review                    |
| 51 | Jones D, West R, Lester C. Evaluation of changes in primary health care availability and provision from the patient perspective.                                                                                                                                                                                              | Inadequate or inappropriate results                     |
| 52 | Jones R, Ostrem A. Optimising pharmacological maintenance treatment for COPD in primary care. <i>Primary Care Respiratory Journal</i> 2011; <b>20</b> (1): 33-45.                                                                                                                                                             | Inadequate or inappropriate results                     |
| 53 | Kayser L, Rossen S, Karnoe A, et al. Development of the Multidimensional Readiness and Enablement Index for Health Technology (READHY) Tool to Measure Individuals' Health Technology Readiness: Initial Testing in a Cancer Rehabilitation Setting. <i>Journal of medical Internet research</i> 2019; <b>21</b> (2): e10377. | Inadequate or inappropriate results                     |
| 54 | Khunti K, Baker R, Rumsey M, Lakhani M. Approaches to the organization of multi-practice audits in primary health care in the UK. <i>International Journal for Quality in Health Care</i> ; <b>11</b> (3): 221-6.                                                                                                             | Inadequate or inappropriate results                     |
| 55 | Kaufman ND, Rajataramya B, Tanomsingh S, Ronis DL, Potempa K. Nurse preparedness for the non-communicable disease escalation in Thailand: a cross-sectional survey of nurses. <i>Nursing &amp; Health Sciences</i> 2012; <b>14</b> (1): 32-7.                                                                                 | Inadequate or inappropriate results                     |
| 56 | Laatikainen T, Inglin L, Collins D, et al. Implementing Package of Essential Non-communicable Disease Interventions in the Republic of Moldova-a feasibility study. <i>Eur J Public Health</i> 2020.                                                                                                                          | Inadequate or inappropriate results                     |
| 57 | Landon BE, Hicks LS, O'Malley AJ, et al. Improving the management of chronic disease at community health centers. <i>New England Journal of Medicine</i> 2007; <b>356</b> (9): 921-34.                                                                                                                                        | Inadequate or inappropriate results                     |
| 58 | Langer S, Chew-Graham CA, Drinkwater J, et al. A motivational intervention for patients with COPD in primary care: qualitative evaluation of a new practitioner role. <i>BMC Family Practice</i> ; <b>15</b> : 164.                                                                                                           | Inadequate or inappropriate results                     |
| 59 | Liu J, Yin H, Zheng T, et al. Primary health institutions preference by hypertensive patients: Effect of distance, trust and quality of management in the rural Heilongjiang province of China.                                                                                                                               | Inadequate or inappropriate results                     |
| 60 | Maarse JA, Ruwaard D, Spreeuwenberg C. The governance of quality management in dutch health care: new developments and strategic challenges. <i>Quality Management in Health Care</i> ; <b>22</b> (3): 236-47.                                                                                                                | Not relevant to the theme for review                    |
| 61 | Madueno A, Martin A, Peculo JA, Anton E, Paravisini A, Leon A. Usefulness of inspiratory capacity measurement in COPD patients in the primary care setting. <i>International Journal of General Medicine</i> 2009; <b>2</b> : 219-25.                                                                                         | Combined data on primary and secondary healthcare level |
| 62 | Main DS, Cohen SJ, DiClemente CC. Measuring physician readiness to change cancer screening: Preliminary results. <i>American Journal of Preventive Medicine</i> 1995; <b>11</b> (1): 54-8.                                                                                                                                    | Inadequate or inappropriate results                     |
| 63 | Monaghan M, Hilliard M, Sweenie R, Riekert K. Transition readiness in adolescents and emerging adults with diabetes: the role                                                                                                                                                                                                 | Inadequate or inappropriate results                     |

|    |                                                                                                                                                                                                                                                                                                                                                               |                                                         |
|----|---------------------------------------------------------------------------------------------------------------------------------------------------------------------------------------------------------------------------------------------------------------------------------------------------------------------------------------------------------------|---------------------------------------------------------|
|    | of patient-provider communication. <i>Current Diabetes Reports</i> ; <b>13</b> (6): 900-8.                                                                                                                                                                                                                                                                    |                                                         |
| 64 | Moynihan M, Saewyc E, Whitehouse S, Paone M, McPherson G. Assessing readiness for transition from paediatric to adult health care: Revision and psychometric evaluation of the Am I ON TRAC for Adult Care questionnaire. <i>Journal of Advanced Nursing</i> ; <b>71</b> (6): 1324-35.                                                                        | Inadequate or inappropriate results                     |
| 65 | Neher M, Landen Ludvigsson M, Enblom A. Preparedness to Implement Physical Activity and Rehabilitation Guidelines in Routine Primary Care Cancer Rehabilitation: Focus Group Interviews Exploring Rehabilitation Professionals' Perceptions. <i>Journal of cancer education : the official journal of the American Association for Cancer Education</i> 2020. | Inadequate or inappropriate results                     |
| 66 | Nilsson GH, Skånér Y, Krakau I, Hassler E, Sundquist K. Primary prevention of first-ever stroke in primary health care: A clinical practice study based on medical register data in sweden.                                                                                                                                                                   | Inadequate or inappropriate results                     |
| 67 | Nuno-Solinis R. Are Healthcare Organizations Ready for Change? Comment on "Development and Content Validation of a Transcultural Instrument to Assess Organizational Readiness for Knowledge Translation in Healthcare Organizations: The OR4KT". <i>International Journal of Health Policy &amp; Management</i> ; <b>7</b> (12): 1158-60.                    | Inadequate or inappropriate results                     |
| 68 | Nyarko KM, Ameme DK, Ocansey D, Comneh E, Markwei MT, Ohene SA. Capacity assessment of selected health care facilities for the pilot implementation of Package for Essential Non-communicable Diseases (PEN) intervention in Ghana. <i>The Pan African medical journal</i> ; <b>25</b> (Suppl 1): 16.                                                         | Combined data on primary and secondary healthcare level |
| 69 | Ogbimi RI. Leadership in Nigerian health system for cancer prevention and control. <i>African Journal of Medicine &amp; Medical Sciences</i> ; <b>38</b> Suppl 2: 49-53.                                                                                                                                                                                      | Inadequate or inappropriate results                     |
| 70 | Ostroff JS, Copeland A, Borderud SP, Li Y, Shelley DR, Henschke CI. Readiness of lung cancer screening sites to deliver smoking cessation treatment: Current practices, organizational priority, and perceived barriers. <i>Nicotine &amp; Tobacco Research</i> 2016; <b>18</b> (5): 1067-75.                                                                 | Not relevant to the theme for review                    |
| 71 | Oyewole EY, Ojewale LY, Abimbola OO. Primary Health Care Nurses' Competencies and Resources Availability for Diabetes Mellitus Care at Local Government Areas of Ibadan. <i>International Journal of Caring Sciences</i> 2020; <b>13</b> (1): 368-80.                                                                                                         | Not relevant to the theme for review                    |
| 72 | Parchman ML, Anderson ML, Coleman K, et al. Assessing quality improvement capacity in primary care practices. <i>BMC Family Practice</i> ; <b>20</b> (1): 103.                                                                                                                                                                                                | Not relevant to the theme for review                    |
| 73 | Pilkerton CS, Singh SS, Bias TK, Frisbee SJ. Healthcare resource availability and cardiovascular health in the USA. <i>BMJ Open</i> 2017; <b>7</b> (12): e016758.                                                                                                                                                                                             | Not relevant to the theme for review                    |
| 74 | Radin A, Cote C. Primary care of the patient with chronic obstructive pulmonary disease-part 1: frontline prevention and early diagnosis. <i>American Journal of Medicine</i> ; <b>121</b> (7 Suppl): S3-12.                                                                                                                                                  | Inadequate or inappropriate results                     |
| 75 | Rathish D, Premarathna I, Jayathilake T, et al. Availability of essential medicines in selected public, primary and secondary health care institutions of a rural Sri Lankan district: A spot survey.                                                                                                                                                         | Combined data on primary and secondary healthcare level |
| 76 | Rogers HE, Akiteng AR, Mutungi G, Ettinger AS, Schwartz JI. Capacity of Ugandan public sector health facilities to prevent and                                                                                                                                                                                                                                | Combined data on primary and secondary healthcare level |

|    |                                                                                                                                                                                                                                                                                                    |                                                         |
|----|----------------------------------------------------------------------------------------------------------------------------------------------------------------------------------------------------------------------------------------------------------------------------------------------------|---------------------------------------------------------|
|    | control non-communicable diseases: an assessment based upon WHO-PEN standards. <i>BMC Health Services Research</i> ; <b>18</b> (1): 606.                                                                                                                                                           |                                                         |
| 77 | Roper KL, Thomas AR, Hieronymus L, Brock A, Keck J. Patient and Clinician Perceptions of Prediabetes: A Mixed-Methods Primary Care Study. <i>Diabetes Educ</i> 2019; <b>45</b> (3): 302-14.                                                                                                        | Inadequate or inappropriate results                     |
| 78 | Schwartz R, Smith C, Speers MA, et al. Capacity building and resource needs of state health agencies to implement community-based cardiovascular disease programs. <i>Journal of Public Health Policy</i> 1993; <b>14</b> (4): 480-94.                                                             | Inadequate or inappropriate results                     |
| 79 | Shaw RJ, Kaufman MA, Bosworth HB, et al. Organizational factors associated with readiness to implement and translate a primary care based telemedicine behavioral program to improve blood pressure control: the HTN-IMPROVE study. <i>Implementation Science</i> ; <b>8</b> : 106.                | Inadequate or inappropriate results                     |
| 80 | Sorensen A, Le LW, Swami N, et al. Readiness for delivering early palliative care: A survey of primary care and specialised physicians. <i>Palliative Medicine</i> 2020; <b>34</b> (1): 114-25.                                                                                                    | Combined data on primary and secondary healthcare level |
| 81 | Soylu TG, Cuellar AE, Goldberg DG, Kuzel AJ. Readiness and Implementation of Quality Improvement Strategies Among Small- and Medium-Sized Primary Care Practices: an Observational Study. <i>Journal of General Internal Medicine</i> 2020.                                                        | Not relevant to the theme for review                    |
| 82 | Tanjasiri SP, Tran JH. Community capacity for cancer control collaboration: weaving an Islander Network for Cancer Awareness, Research and Training for Pacific Islanders in Southern California. <i>Cancer Detection &amp; Prevention</i> ; <b>32 Suppl 1</b> : S37-40.                           | Inadequate or inappropriate results                     |
| 83 | Tompkins JW, Mequanint S, Barre DE, et al. National Survey of Indigenous primary healthcare capacity and delivery models in Canada: the TransFORMation of IndiGENous PrimAry HEAlthcare delivery (FORGE AHEAD) community profile survey. <i>BMC Health Services Research</i> ; <b>18</b> (1): 828. | Combined data on primary and secondary healthcare level |
| 84 | Weeks DL, Polello JM, Hansen DT, Keeney BJ, Conrad DA. Measuring primary care organizational capacity for diabetes care coordination: the Diabetes Care Coordination Readiness Assessment. <i>Journal of General Internal Medicine</i> ; <b>29</b> (1): 98-103.                                    | Not relevant to the theme for review                    |

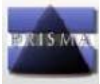

## PRISMA 2020 Checklist

| Section and Topic             | Item # | Checklist item                                                                                                                                                                                                                                                                                                                     | Location where item is reported                                                                      |
|-------------------------------|--------|------------------------------------------------------------------------------------------------------------------------------------------------------------------------------------------------------------------------------------------------------------------------------------------------------------------------------------|------------------------------------------------------------------------------------------------------|
| <b>TITLE</b>                  |        |                                                                                                                                                                                                                                                                                                                                    |                                                                                                      |
| Title                         | 1      | Identify the report as a systematic review.                                                                                                                                                                                                                                                                                        | Lines 2-3, Page 1                                                                                    |
| <b>ABSTRACT</b>               |        |                                                                                                                                                                                                                                                                                                                                    |                                                                                                      |
| Abstract                      | 2      | See the PRISMA 2020 for Abstracts checklist.                                                                                                                                                                                                                                                                                       | Lines 25-48, Page 2                                                                                  |
| <b>INTRODUCTION</b>           |        |                                                                                                                                                                                                                                                                                                                                    |                                                                                                      |
| Rationale                     | 3      | Describe the rationale for the review in the context of existing knowledge.                                                                                                                                                                                                                                                        | Lines 90-117, Page 4-5                                                                               |
| Objectives                    | 4      | Provide an explicit statement of the objective(s) or question(s) the review addresses.                                                                                                                                                                                                                                             | Lines 121-122, Page 45                                                                               |
| <b>METHODS</b>                |        |                                                                                                                                                                                                                                                                                                                                    |                                                                                                      |
| Eligibility criteria          | 5      | Specify the inclusion and exclusion criteria for the review and how studies were grouped for the syntheses.                                                                                                                                                                                                                        | Lines 132-137, Page 6                                                                                |
| Information sources           | 6      | Specify all databases, registers, websites, organisations, reference lists and other sources searched or consulted to identify studies. Specify the date when each source was last searched or consulted.                                                                                                                          | Lines 146-161, Page 7                                                                                |
| Search strategy               | 7      | Present the full search strategies for all databases, registers and websites, including any filters and limits used.                                                                                                                                                                                                               | Supplementary materials                                                                              |
| Selection process             | 8      | Specify the methods used to decide whether a study met the inclusion criteria of the review, including how many reviewers screened each record and each report retrieved, whether they worked independently, and if applicable, details of automation tools used in the process.                                                   | Lines 192-208, Page 8-9                                                                              |
| Data collection process       | 9      | Specify the methods used to collect data from reports, including how many reviewers collected data from each report, whether they worked independently, any processes for obtaining or confirming data from study investigators, and if applicable, details of automation tools used in the process.                               | Lines 181-190, Page 8                                                                                |
| Data items                    | 10a    | List and define all outcomes for which data were sought. Specify whether all results that were compatible with each outcome domain in each study were sought (e.g. for all measures, time points, analyses), and if not, the methods used to decide which results to collect.                                                      | Lines 209-218, Page 9                                                                                |
|                               | 10b    | List and define all other variables for which data were sought (e.g. participant and intervention characteristics, funding sources). Describe any assumptions made about any missing or unclear information.                                                                                                                       | Lines 209-218, Page 9                                                                                |
| Study risk of bias assessment | 11     | Specify the methods used to assess risk of bias in the included studies, including details of the tool(s) used, how many reviewers assessed each study and whether they worked independently, and if applicable, details of automation tools used in the process.                                                                  | Lines 192-202, Page 8                                                                                |
| Effect measures               | 12     | Specify for each outcome the effect measure(s) (e.g. risk ratio, mean difference) used in the synthesis or presentation of results.                                                                                                                                                                                                | Result was thematically presented in descriptive manner. Therefore, no effect measure was presented. |
| Synthesis methods             | 13a    | Describe the processes used to decide which studies were eligible for each synthesis (e.g. tabulating the study intervention characteristics and comparing against the planned groups for each synthesis (item #5)). <a href="https://www.bmj.com/site/about/guidelines.xhtml">https://www.bmj.com/site/about/guidelines.xhtml</a> | Lines 192-202, Page 8                                                                                |

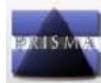

## PRISMA 2020 Checklist

| Section and Topic             | Item # | Checklist item                                                                                                                                                                                                                                                                       | Location where item is reported                                                           |
|-------------------------------|--------|--------------------------------------------------------------------------------------------------------------------------------------------------------------------------------------------------------------------------------------------------------------------------------------|-------------------------------------------------------------------------------------------|
|                               | 13b    | Describe any methods required to prepare the data for presentation or synthesis, such as handling of missing summary statistics, or data conversions.                                                                                                                                | Lines 192-202, Page 8                                                                     |
|                               | 13c    | Describe any methods used to tabulate or visually display results of individual studies and syntheses.                                                                                                                                                                               | Lines 192-202, Page 8                                                                     |
|                               | 13d    | Describe any methods used to synthesize results and provide a rationale for the choice(s). If meta-analysis was performed, describe the model(s), method(s) to identify the presence and extent of statistical heterogeneity, and software package(s) used.                          | No meta-analysis performed                                                                |
|                               | 13e    | Describe any methods used to explore possible causes of heterogeneity among study results (e.g. subgroup analysis, meta-regression).                                                                                                                                                 | No meta-analysis performed                                                                |
|                               | 13f    | Describe any sensitivity analyses conducted to assess robustness of the synthesized results.                                                                                                                                                                                         | No sensitivity                                                                            |
| Reporting bias assessment     | 14     | Describe any methods used to assess risk of bias due to missing results in a synthesis (arising from reporting biases).                                                                                                                                                              | Lines 192-202, Page 8                                                                     |
| Certainty assessment          | 15     | Describe any methods used to assess certainty (or confidence) in the body of evidence for an outcome.                                                                                                                                                                                | Not applicable in this review                                                             |
| <b>RESULTS</b>                |        |                                                                                                                                                                                                                                                                                      |                                                                                           |
| Study selection               | 16a    | Describe the results of the search and selection process, from the number of records identified in the search to the number of studies included in the review, ideally using a flow diagram.                                                                                         | Lines 229-246, Page 10                                                                    |
|                               | 16b    | Cite studies that might appear to meet the inclusion criteria, but which were excluded, and explain why they were excluded.                                                                                                                                                          | Supplementary materials                                                                   |
| Study characteristics         | 17     | Cite each included study and present its characteristics.                                                                                                                                                                                                                            | Lines 229-246, Page 10                                                                    |
| Risk of bias in studies       | 18     | Present assessments of risk of bias for each included study.                                                                                                                                                                                                                         | Lines 192-202, Page 8                                                                     |
| Results of individual studies | 19     | For all outcomes, present, for each study: (a) summary statistics for each group (where appropriate) and (b) an effect estimate and its precision (e.g. confidence/credible interval), ideally using structured tables or plots.                                                     | Result was presented thematically. Therefore, no table/confidence interval was presented. |
| Results of syntheses          | 20a    | For each synthesis, briefly summarise the characteristics and risk of bias among contributing studies.                                                                                                                                                                               | Not exactly relevant in this review as reported was described under themes                |
|                               | 20b    | Present results of all statistical syntheses conducted. If meta-analysis was done, present for each the summary estimate and its precision (e.g. confidence/credible interval) and measures of statistical heterogeneity. If comparing groups, describe the direction of the effect. | Not exactly relevant in this review as                                                    |

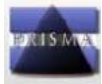

## PRISMA 2020 Checklist

| Section and Topic         | Item # | Checklist item                                                                                                                                 | Location where item is reported                                            |
|---------------------------|--------|------------------------------------------------------------------------------------------------------------------------------------------------|----------------------------------------------------------------------------|
|                           |        |                                                                                                                                                | reported was described under themes                                        |
|                           | 20c    | Present results of all investigations of possible causes of heterogeneity among study results.                                                 | Lines 473-481, Page 24                                                     |
|                           | 20d    | Present results of all sensitivity analyses conducted to assess the robustness of the synthesized results.                                     | Not exactly relevant in this review as reported was described under themes |
| Reporting biases          | 21     | Present assessments of risk of bias due to missing results (arising from reporting biases) for each synthesis assessed.                        | Not exactly relevant in this review as reported was described under themes |
| Certainty of evidence     | 22     | Present assessments of certainty (or confidence) in the body of evidence for each outcome assessed.                                            | Not exactly relevant in this review as reported was described under themes |
| <b>DISCUSSION</b>         |        |                                                                                                                                                |                                                                            |
| Discussion                | 23a    | Provide a general interpretation of the results in the context of other evidence.                                                              | Lines 420-468, Page 22-24                                                  |
|                           | 23b    | Discuss any limitations of the evidence included in the review.                                                                                | Lines 473-481, Page 24                                                     |
|                           | 23c    | Discuss any limitations of the review processes used.                                                                                          | Lines 473-481, Page 24                                                     |
|                           | 23d    | Discuss implications of the results for practice, policy, and future research.                                                                 | Lines 473-481, Page 24                                                     |
| <b>OTHER INFORMATION</b>  |        |                                                                                                                                                |                                                                            |
| Registration and protocol | 24a    | Provide registration information for the review, including register name and registration number, or state that the review was not registered. | Lines 128-130, Page 6                                                      |
|                           | 24b    | Indicate where the review protocol can be accessed, or state that a protocol was not prepared.                                                 | Protocol was not prepared                                                  |
|                           | 24c    | Describe and explain any amendments to information provided at registration or in the protocol.                                                | No amendment done                                                          |
| Support                   | 25     | Describe sources of financial or non-financial support for the review, and the role of the funders or sponsors in the review.                  | Lines 511, Page                                                            |



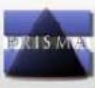

# PRISMA 2020 Checklist

1  
2  
3  
4  
5  
6  
7  
8  
9  
10  
11  
12  
13  
14  
15  
16  
17  
18  
19  
20  
21  
22  
23  
24  
25  
26  
27  
28  
29  
30  
31  
32  
33  
34  
35  
36  
37  
38  
39  
40  
41  
42  
43  
44  
45  
46  
47

| Section and Topic                              | Item # | Checklist item                                                                                                                                                                                                                             | Location where item is reported |
|------------------------------------------------|--------|--------------------------------------------------------------------------------------------------------------------------------------------------------------------------------------------------------------------------------------------|---------------------------------|
|                                                |        |                                                                                                                                                                                                                                            | 25                              |
| Competing interests                            | 26     | Declare any competing interests of review authors.                                                                                                                                                                                         | Lines 505, Page 25              |
| Availability of data, code and other materials | 27     | Report which of the following are publicly available and where they can be found: template data collection forms; data extracted from included studies; data used for all analyses; analytic code; any other materials used in the review. | Lines 507, Page 25              |

From: Page MJ, McKenzie JE, Bossuyt PM, Boutron I, Hoffmann TC, Mulrow CD, et al. The PRISMA 2020 statement: an updated guideline for reporting systematic reviews. *BMJ* 2021;372:n71. doi: 10.1136/bmj.n71  
 For more information, visit: <http://www.prisma-statement.org/>

For peer review only

1  
2  
3 29-Nov-2021  
4

5 Dear Mr. Kabir:  
6

7 I write you in regards to manuscript # bmjopen-2021-057421.R1 entitled "Health system readiness for  
8 non-communicable diseases at the primary care level: A systematic review" which you submitted to  
9 BMJ Open.  
10

11 In view of the criticisms of the re-reviewer(s) found at the bottom of this letter, your manuscript has  
12 been declined for publication in BMJ Open.  
13

14 Thank you for considering BMJ Open for the publication of your research and I am sorry to be  
15 sending disappointing news. I hope the outcome of this specific submission will not discourage you  
16 from the submission of future manuscripts.  
17

18 Sincerely,  
19

20  
21 Neil Bennet  
22 Senior Assistant Editor  
23 BMJ Open  
24

25 \*\*\* \*\*

26 Respected Editor,

27 We want to thank you for considering the revision submission to address the reviewers' comments  
28 and queries. We believe these comments and queries have helped to enhance the quality of our paper  
29 significantly.  
30

31 We have carefully revised our manuscript as per the valuable comments provided by all the reviewers.  
32 Hoping that the paper now holds up to the requirements of the journal.  
33

34 Please let us know if it needs any further changes.  
35

36 Thank you again.

37 Kind regards,  
38 Ashraful Kabir  
39 On behalf of the authors  
40

41  
42 Reviewer: 3

43 Dr. David Hailey, University of Wollongong

44 Comments to the Author:

45 A number of corrections have been made to the manuscript and some additional detail provided.  
46 However, further checking for errors and omissions is recommended.  
47  
48

49 **Response:** Thank you for your recommendation. We have rechecked the manuscript and errors and  
50 omissions were thoroughly addressed.  
51

52 Responses regarding Table 2 were noted. Grouping the studies by country rather than by the names  
53 of first authors might be considered.  
54

55 **Response:** The comment has been addressed. We have added a column as country in the revised  
56 manuscript: **Table 2, Page: 12-15**  
57

58 The manuscript still states that most of the studies were of acceptable quality (p20, line 409), though  
59 'most' was only 57%. This is followed, in the Discussion, by "Most of the studies included in this  
60

review had a reasonably acceptable quality” (p22, line 458). The details that follow are helpful but a more considered summary statement is required.

**Response:** The first comment above has been addressed as follows (please see lines: 432-435, page: 22) in the revised manuscript:

Nearly three-fifth (61%) of the studies were of good or high quality (MMAT score of 75) (Table 1): one paper (4%) had an MMAT score of 25 (low quality), eight (35%) scored 50 (medium quality), eleven (48%) received 75 (good quality) and three (13%) reached 100 (high quality). No study had an MMAT score of 0 (poor quality).

The second comment above has been addressed as follows (lines: 485-493, Page: 24) in the revised manuscript):

The sentence ‘Most of the studies included in this review had a reasonably acceptable quality’ has been replaced with (please see line: 485-486, page: 24) ‘Majority of the studies in this review had good or high quality’.

Furthermore, the following texts have been added (please see lines: 488-493, page: 24)

‘A few quantitative studies lacked sufficient details about the participants’ selection criteria, standard criteria for minimizing bias, and use of non-validated questionnaires with a relatively small sample size that might affect the scope of generalizability of the findings (27, 29, 32, 34, 35). One mixed-method study was rated low quality due to the homogeneous sample and insufficient information about the data analysis (47). The rest of the mixed-method studies included in the review had a more representative sample size and methodological rigors.’

The information regarding increasing prevalence of DM and HTN is worthwhile but does not address the point made which referred to “The focus on DM and HTN may be due to multiple factors, including increasing prevalence and associated determinants/risk factors for other NCDs.....” (lines 441-443 in R1)

**Response:** We have provided additional text to explain the possible reason for higher level readiness/availability of services for DM and HTN compare to the other NCDs (cancer, CRD, CVD) in the discussion section: Lines: 468-477, Page: 23

‘Moreover, the integrated model for DM and HTN care has widely been considered in the low-and middle-income countries that accelerated the provision of effective and equitable health service delivery at the primary healthcare level, which would have helped to address the rising burden of them with accessible, equitable, and cost-effective interventions (56-58)’

Reviewer: 4

Dr. Rajat Das Gupta, BRAC University James P Grant School of Public Health  
Comments to the Author:

Thank you for addressing the comments. I have few comments:

1. I am not convinced about the logic of restricting the earliest date of search to January 1990. The authors wrote: “. The studies published in 1985 onward were deemed to be relevant to this review. Therefore, the earliest date of the search was set to ensure the optimum number of studies published since 1990.” Then the authors should set the search date starting from January 1985. That would ensure them that they are not missing any studies.

**Response:** Thank you for raising this concern regarding the starting date of search. The search has been updated from January 1984 to December 1990, which resulted in 17 additional studies and of

1  
2  
3 them no study satisfied the inclusion criteria. The revised manuscript has been updated with this  
4 search results.  
5  
6

7  
8 2. Also excluding SPA reports is a big fallacy of this manuscript. If this is a systematic review  
9 aiming to synthesise the current evidences on primary healthcare system readiness and evaluate its  
10 response to NCDs on a global scale, even by amending the study protocol. Without this the systematic  
11 review will be incomplete and the evidence will not be robust. DHS does these surveys to generate  
12 evidence and these surveys follow rigorous methods. The authors should again consider this.  
13

14 **Response:** We acknowledge that SPA report presents important information regarding the  
15 preparedness of the primary healthcare system regarding the NCDs. We have considered this report  
16 as relevant. However, we understand that SPA reports health system preparedness at the primary as  
17 well as secondary healthcare levels on the various health system components. Thus, it was not always  
18 possible to retrieve solely the primary healthcare-specific data from these reports. The following texts  
19 were included in the revised manuscript.  
20

21 **Lines: 324-330**

22  
23 ‘The shortage of trained healthcare staff (at least one staff received in-service training in the last 24  
24 months before the data collection date) was reported at the primary healthcare in Bangladesh (39).  
25 The trained staff for cervical cancer (29% trained staff at the UHCs, but no trained staff in CCs and  
26 union-level facilities), CRD (4% union-level facilities, 11% CCs, and 29% UHCs), CVD (7% union-  
27 level facilities, 15% CCs, and 40%, UHCs), DM (3% union-level facilities, 14% CCs, and 28%  
28 UHCs), and hypertension (6% union-level facilities, 10% CCs, and 39% UHCs) were reported (39).’  
29

30  
31 **Lines: 368-371, Pages: 18-19**

32  
33 ‘In Bangladesh, the availability of medicine widely varied at the UHCs based on their types for DM  
34 (metformin 38.1%, glibenclamide 7.4%), CRD (salbutamol 91.6%, epinephrine 0.3%), CVD  
35 (amlodipine/nifedipine 41.5%, aspirin 2.6%), and HTN (amlodipine/nifedipine 44.7%, thiazide 1.4%),  
36 but no supply in the CCs were reported (39).  
37

38 **Lines: 388-392, Page: 20**

39  
40 ‘However, basic equipment and diagnostic facilities such as stethoscope (93.2% CCs, 96.9% UHCs),  
41 blood pressure apparatus (85.6% CCs, 95.4% UHC), adult scale (90.9% CC, 82.9% UHCs), blood  
42 glucose testing (22.2% CCs, 48.9% UHCs), urine protein (0% CCs, 36.2% UHCs), and urine glucose  
43 (0% CCs, 30.4% UHCs) were available in Bangladesh (39).  
44

45 \*\*\* \*\*

46 COI statements:  
47  
48

49 Reviewer: 3

50 Competing interests of Reviewer: None to declare  
51

52 Reviewer: 4

53 Competing interests of Reviewer: None declared  
54

55 \*\* \*\*  
56  
57  
58  
59  
60

# BMJ Open

## Health system readiness for non-communicable diseases at the primary care level: a systematic review

|                                 |                                                                                                                                                                                                                                                                                                                                  |
|---------------------------------|----------------------------------------------------------------------------------------------------------------------------------------------------------------------------------------------------------------------------------------------------------------------------------------------------------------------------------|
| Journal:                        | <i>BMJ Open</i>                                                                                                                                                                                                                                                                                                                  |
| Manuscript ID                   | bmjopen-2021-060387.R1                                                                                                                                                                                                                                                                                                           |
| Article Type:                   | Original research                                                                                                                                                                                                                                                                                                                |
| Date Submitted by the Author:   | 26-Jan-2022                                                                                                                                                                                                                                                                                                                      |
| Complete List of Authors:       | Kabir, Ashraful; Monash University, School of Public Health and Preventive Medicine<br>Karim, Md; Monash University, SPHPM;<br>Islam, Rakibul; Monash University, Women's Health Research Program<br>Romero, Lorena ; The Ian Potter Library, Ground Floor, AMREP Building, The Alfred<br>Billah, Baki; Monash University, SPHPM |
| <b>Primary Subject Heading</b>: | Public health                                                                                                                                                                                                                                                                                                                    |
| Secondary Subject Heading:      | Health services research                                                                                                                                                                                                                                                                                                         |
| Keywords:                       | PRIMARY CARE, PUBLIC HEALTH, SOCIAL MEDICINE                                                                                                                                                                                                                                                                                     |
|                                 |                                                                                                                                                                                                                                                                                                                                  |

SCHOLARONE™  
Manuscripts

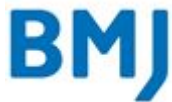

I, the Submitting Author has the right to grant and does grant on behalf of all authors of the Work (as defined in the below author licence), an exclusive licence and/or a non-exclusive licence for contributions from authors who are: i) UK Crown employees; ii) where BMJ has agreed a CC-BY licence shall apply, and/or iii) in accordance with the terms applicable for US Federal Government officers or employees acting as part of their official duties; on a worldwide, perpetual, irrevocable, royalty-free basis to BMJ Publishing Group Ltd ("BMJ") its licensees and where the relevant Journal is co-owned by BMJ to the co-owners of the Journal, to publish the Work in this journal and any other BMJ products and to exploit all rights, as set out in our [licence](#).

The Submitting Author accepts and understands that any supply made under these terms is made by BMJ to the Submitting Author unless you are acting as an employee on behalf of your employer or a postgraduate student of an affiliated institution which is paying any applicable article publishing charge ("APC") for Open Access articles. Where the Submitting Author wishes to make the Work available on an Open Access basis (and intends to pay the relevant APC), the terms of reuse of such Open Access shall be governed by a Creative Commons licence – details of these licences and which [Creative Commons](#) licence will apply to this Work are set out in our licence referred to above.

Other than as permitted in any relevant BMJ Author's Self Archiving Policies, I confirm this Work has not been accepted for publication elsewhere, is not being considered for publication elsewhere and does not duplicate material already published. I confirm all authors consent to publication of this Work and authorise the granting of this licence.

1  
2  
3 **1 Review Title:**

4 2 Health system readiness for non-communicable diseases at the primary care level: a systematic review  
5 3  
6 4  
7 5  
8 6  
9 7  
10

11  
12 **8 Short Title:**

13  
14  
15 9 Health system readiness for non-communicable diseases: a systematic review  
16  
17  
18  
19 10  
20  
21  
22 11

23  
24  
25 12 Ashraful Kabir<sup>1\*</sup>, Md Nazmul Karim<sup>1</sup>, Rakibul Islam<sup>1</sup>, Lorena Romero<sup>2</sup>, Baki Billah<sup>1</sup>  
26  
27

28 13 <sup>1</sup> Department of Epidemiology and Preventive Medicine, School of Public Health and Preventive  
29 14 Medicine, Monash University, Melbourne, Australia

30  
31  
32  
33 15 <sup>2</sup> The Ian Potter Library, The Alfred, Melbourne, Australia  
34  
35  
36 16  
37  
38

39 17 \* Corresponding author  
40  
41

42 18 Ashraful Kabir  
43  
44

45 19 Department of Epidemiology and Preventive Medicine  
46  
47

48 20 School of Public Health and Preventive Medicine  
49  
50

51 21 Monash University, Melbourne, Australia  
52  
53

54 22 Phone: +61 0431249851  
55  
56

57 23 Email: [md.kabir@monash.edu](mailto:md.kabir@monash.edu)  
58  
59  
60

## 24 Abstract

25 **Objective:** To synthesise evidence on the primary healthcare system's readiness for preventing and  
26 managing non-communicable diseases (NCDs).

27 **Design:** Systematic review.

28 **Data sources:** Ovid MEDLINE, EMBASE, CINAHL, PsycINFO and Scopus were searched from 1  
29 January 1984 to 30 July 2021, with hand-searching references and expert advice.

30 **Eligibility criteria:** Any English-language health research with evidence of readiness/preparedness of  
31 the health system at the primary healthcare level in the context of four major NCDs: diabetes mellitus,  
32 cancer, chronic respiratory diseases, and cardiovascular diseases.

33 **Data extraction and synthesis:** Two authors independently extracted data and assessed the bias. The  
34 full-text selected articles were then assessed using the Mixed Methods Appraisal Tool. Health system  
35 readiness was descriptively and thematically synthesized in line with the health system dynamics  
36 framework.

37 **Results:** Out of 7,843 records, 23 papers were included in this review (15 quantitative, three qualitative  
38 and five mixed-method studies). The findings showed that existing literature predominantly examined  
39 health system readiness from the supply-side perspective as embedded in the World Health  
40 Organization's health system framework. However, at the primary healthcare level, these components  
41 are insufficiently prepared for NCDs. Among NCDs, higher levels of readiness were reported for  
42 diabetes mellitus and hypertension in comparison to chronic respiratory diseases (asthma, chronic  
43 obstructive pulmonary disease), cardiovascular diseases and cancer. There has been a dearth of research  
44 on the demand-side perspective, which is an essential component of a health system and must be  
45 addressed in future research.

46 **Conclusion:** The supply-side components at the primary healthcare level are inadequately ready to  
47 address the growing NCD burden. Improving supply-side factors, with a particular focus on chronic  
48 respiratory diseases, cardiovascular diseases and cancer, and improving understanding of the demand-



1  
2  
3 49 side components of the health system's readiness, may help to prevent and manage NCDs at the primary  
4  
5 50 healthcare level.  
6  
7

8 51 **Keywords:** non-communicable diseases, health system readiness, primary health care, systematic  
9  
10 52 review  
11  
12

### 13 53 **Strengths and limitations of this study**

14  
15  
16

- 17 54 • Data synthesis was informed by the health system dynamics framework, which offers a deeper  
18  
19 55 and more comprehensive (both supply-side and demand-side factors) understanding of primary  
20  
21 56 healthcare system readiness for NCDs.  
22  
23 57 • We conducted an extensive systematic search of literature with hand-searching references and  
24  
25 58 expert advice regarding health system readiness for non-communicable diseases at the primary  
26  
27 59 care level, which increases the validity and trustworthiness of this review's findings.  
28  
29  
30 60 • Meta-analysis was not possible due to heterogeneity of study designs, methods and techniques,  
31  
32 61 as well as the studies' focus on a variety of health system components.  
33  
34 62 • A few studies that reported health system readiness at combined primary and secondary  
35  
36 63 healthcare levels were excluded.  
37  
38  
39 64  
40  
41  
42 65  
43  
44 66  
45  
46  
47 67  
48  
49  
50 68  
51  
52  
53 69  
54  
55 70  
56  
57  
58 71  
59  
60

## 72 Introduction

73 Globally, non-communicable diseases (NCDs) are the leading causes of deaths and disabilities,  
74 accounting for 41 million deaths (71% of all deaths) annually (1), with 77% occurring in low- and  
75 middle-income countries (1, 2). The current increased NCD burden may be due to the rise of the ageing  
76 population, rapid and/or unplanned urbanisation and lifestyle-related factors (e.g. physical inactivity,  
77 unhealthy diets and consumption of tobacco products and alcohol) (3). If current trends continue, the  
78 estimated cumulative deaths from NCDs will reach 52 million by 2030 (3), and NCD-related cost was  
79 projected to be US\$ 47 trillion between 2010 and 2030 (4). NCDs' predicted health outcomes and  
80 economic burden will have adverse consequences, such as prolonged illness or disability, greater  
81 treatment costs, loss of productivity and substantial opportunity cost, which will eventually affect  
82 households' economy and well-being (4, 5). The impact of NCDs may result in increased poverty,  
83 higher inequality and low quality of life. Considering the immense influence of NCDs, many  
84 commitments and control strategies have been made at the global, national and local levels to prevent  
85 and manage them (6-8). The Sustainable Development Goals, for example, by 2030, targeted one-third  
86 reduction of premature deaths from the four major NCDs of diabetes mellitus (DM), cancer, chronic  
87 respiratory diseases (CRDs) and cardiovascular diseases (CVDs) (8, 9) among people aged 30–69.

88

89 Primary healthcare is crucial for promoting essential healthcare services and achieving improved health  
90 outcomes, particularly in countries with resource-poor settings (3, 10-12). Growing evidence shows that  
91 a well-functioning primary healthcare system has immense potential for improving global health  
92 outcomes due to its extensive coverage, cost-effectiveness, well-structured network of healthcare  
93 facilities, affordable technologies, socially and culturally acceptable intervention methods and broad  
94 community participation (10, 13, 14). NCD prevention and management differ from that of acute  
95 conditions, where the primary healthcare approach has a powerful impact. Unlike acute conditions,  
96 NCD prevention and management require extended or even life-long healthcare support, early case  
97 detection, psychosocial promotion, risk factor identification, self-management, behavioural  
98 modifications and regular medical support, such as adherence to medical procedures and treatment (3).

1  
2  
3 99 The primary healthcare system is typically the first-line contact for individuals seeking care, making it  
4  
5 100 easier for patients to continue follow-up contacts (15). Therefore, it can be viewed as the most effective  
6  
7 101 and appropriate mechanism for addressing NCDs.  
8  
9

10 102  
11  
12 103 While the literature emphasises the roles and importance of the primary healthcare system in preventing  
13  
14 104 and managing NCDs following a dozen of global commitments and strategies, little is known about the  
15  
16 105 extent to which it is ready to deliver NCD services (16, 17). The concept of ‘health system readiness’  
17  
18 106 is often explained in terms of the health system ‘components’ or ‘framework’. Until recently, health  
19  
20 107 system readiness was mostly defined and presented in the context of the World Health Organization’s  
21  
22 108 (WHO) health system framework, proposed in 2008, which described six ‘key elements’ or ‘building  
23  
24 109 blocks’: health service delivery, health workforce, health financing, health information system,  
25  
26 110 leadership and governance, medical products, knowledge and technologies (18). However, the WHO’s  
27  
28 111 model is viewed as having limited capacity to comprehensively explain how and whether different  
29  
30 112 health system elements within a broader societal context interact and are influenced, as well as how  
31  
32 113 population/individual behaviour and choices and the process impact this mechanism (19, 20). In order  
33  
34 114 to provide an exhaustive understanding of system interactions, van Olmen et al. proposed the ‘health  
35  
36 115 system dynamics framework’, which included the WHO’s six building blocks and concurrent literature.  
37  
38 116 It is comprised of 10 elements that analyse their interactions and functions under a broader societal  
39  
40 117 context (21).  
41  
42  
43  
44  
45 118

46  
47 119 Guided by the ‘health system dynamics framework’, this systematic review aimed to synthesise the  
48  
49 120 current evidences on primary healthcare system readiness and evaluate its response to NCDs on a global  
50  
51 121 scale. The findings of this review will help policymakers, public health planners and researchers focus  
52  
53 122 on the further actions required to establish a well-prepared health system at the primary healthcare level  
54  
55 123 to address the growing NCD burden.  
56  
57  
58 124  
59  
60

125

**126 Methods****127 Protocol and registration**

128 This review was conducted following the Preferred Reporting Items for Systematic Reviews and Meta-  
129 Analysis (PRISMA) guideline (22) and was registered on the Research Registry  
130 (REVIEWREGISTRY1163).

**131 Inclusion criteria**

132 This review included studies that reported on the readiness/preparedness of various health system  
133 components at the primary healthcare level in the context of four major NCDs: DM, cancer, CRDs and  
134 CVDs. Where studies reported health system preparedness at the primary and secondary care level  
135 combined, only information related to the primary healthcare level was included. However, studies in  
136 which the primary and secondary care level data could not be separated were excluded.

**137 Exclusion criteria**

138 Studies on other NCDs such as arsenicosis, kidney diseases, mental health disorders, hearing disability,  
139 oral disease, birth defects and road injuries were excluded. Papers that focused on NCD  
140 interventions/programmes beyond the primary healthcare level were likewise excepted. Editorials,  
141 letters, opinion articles, narrative or systematic reviews, study protocols, conference abstracts, posters,  
142 reports, and book chapters were also not considered. Additionally, works that were published in a  
143 language other than English were excluded.

**144 Data sources and search strategy**

145 The search strategy aimed to find English language studies in five databases (Ovid Medline, Ovid  
146 Embase, Ovid PsycInfo, CINAHL and Scopus) published between 1 January 1984 and 30 July 2021  
147 (Figure 1). The WHO's health system model proposed in 1984 was considered appropriate to identify  
148 and assess the key components of the primary healthcare system. The studies published in 1984 onward  
149 were deemed to be relevant to this review. Therefore, the earliest date of the search was set to ensure

1  
2  
3 150 the optimum number of studies published since 1984. The search strategies used a combination of  
4  
5 151 subject headings and free text terms that aimed to cover the areas of (1) non-communicable diseases  
6  
7 152 (e.g., chronic disease or chronic conditions or chronic disorders), AND (2) primary health system (e.g.  
8  
9 153 primary health service or first-level healthcare facility or local health system or local-level health  
10  
11 154 facility) AND (3) readiness or preparedness or capacity.

14 155 Searches were adapted as appropriate to the specifications of each of the 5 databases. The final searches  
15  
16 156 are presented in the (Supplementary Appendix file). Hand-searching and reference checking of  
17  
18 157 citations and reference lists were undertaken, and additional records were identified through personal  
19  
20 158 consultations with experts, including researchers, administrators, policy planners, and public health  
21  
22 159 practitioners.

24  
25 160

27  
28 161

30 162 **[FIGURE 1 SHOULD BE INSERTED HERE]**

31 163

33  
34 164

36  
37 165

38  
39 166

41  
42 167

43  
44 168

46  
47 169

48  
49 170

51  
52 171

53  
54 172

55  
56 173

57  
58  
59  
60

1  
2  
3 174  
4  
5  
6 175  
7 176  
8 177  
9  
10  
11 178  
12  
13  
14 179  
15  
16 180  
17  
18 181  
19  
20 182  
21  
22 183  
23  
24 184  
25  
26 185  
27  
28 186  
29  
30 187  
31  
32 188  
33  
34  
35 189  
36  
37  
38 190  
39  
40 191  
41  
42 192  
43  
44 193  
45  
46 194  
47  
48 195  
49  
50 196  
51  
52 197  
53  
54  
55 198  
56  
57 199  
58  
59 200  
60

Figure 1 PRISMA flowchart for study inclusion.

### **Data extraction**

Three authors were involved in the data extraction process. First, records identified through database and manual searches were imported into the Endnote library (EndNote X9.2, Thomson Reuters 2019). Afterwards, the duplicate records were removed. Next, two authors (AK and NK) independently screened the studies based on their titles and/or abstracts. The full-text selected articles were then assessed using the inclusion and exclusion criteria and the standard quality assessment. When inconsistencies and discrepancies arose, a senior author (BB) was brought in to resolve the disagreements through discussion and consensus. A standardised data extraction sheet was developed and piloted. The extraction sheet contains the following study-specific information: authors, publication year, country, study aims, study design and settings, sample size and participants, data collection method and tool used, NCD/risk factor studied, health system component focus and key findings.

### **Quality assessment**

The Mixed Methods Appraisal Tool (MMAT) was used to assess the methodological quality of the included studies (23). The distribution of MMAT scores varied with the study design and the evaluation of some selected parameters. The score is 25% when quantitative study (QUAN) = 1, qualitative study (QUAL) = 1 or mixed-method study (MM) = 0. It is 50% when QUAN = 2, QUAL = 2 or MM = 1; 75% when QUAN = 3, QUAL = 3 or MM = 2; and it is 100% when QUAN = 4, QUAL = 4 or MM = 3. Thus, each study was given a score ranging from 25% to 100% (Table 1). Two authors (AK and NK) independently assessed the studies' quality, and the senior author (BB) cross-checked them. Discrepancies and disagreements were resolved through discussion.

201 Table 1 Type of research design and associated quality of included studies (n=23)

| Study design  | Number of studies (%) | MMAT score (%) |    |    |     |
|---------------|-----------------------|----------------|----|----|-----|
|               |                       | 25             | 50 | 75 | 100 |
| Quantitative  | 15 (65)               | -              | 5  | 7  | 3   |
| Qualitative   | 3 (13)                | -              | 1  | 2  | -   |
| Mixed-methods | 5 (22)                | 1              | 2  | 2  | -   |

202 Note. Entries in the table show the number of studies

## 204 Data synthesis

205 Data analysis was guided by the health system dynamics framework (24). The following themes were  
 206 synthesised using this framework: (i) health service delivery, (ii) healthcare workforce, (iii) health  
 207 financing, (iv) access to medical products and knowledge/technologies, (v) health information system,  
 208 (vi) leadership and governance and (vii) community perspective. Under these themes, data from  
 209 quantitative studies were reported descriptively using frequencies or percentages, while qualitative  
 210 studies were synthesised by determining themes. In this process, a few steps were followed: (i)  
 211 familiarising, (ii) identifying themes (health system components), (iii) indexing, (iv) charting and (v)  
 212 mapping and interpreting. Data from mixed-methods studies were analysed both descriptively and  
 213 thematically analysed. The heterogeneous study design of the included studies precluded a meaningful  
 214 meta-analysis in this review.

## 215 Ethics statement

216 This review has been done as part of a PhD project. The project has been approved by the Monash  
 217 University Human Research Ethics Committee (Project ID: 27112) and Bangladesh Medical Research  
 218 Council (Ref: BMRC/NREC/2019-2022/270).

## 219 Patient and public involvement

220 There was no patient or public involvement.

## 222 Results

## 223 **General characteristics of the study**

224 Initially, 7,843 studies were retrieved, from which 2,213 duplicates were excluded (Figure 1). Then,  
225 5,630 studies were excluded based on a title and abstract review, with 107 meeting the inclusion criteria  
226 for a full-text review. Following the full-text review, 23 studies were ultimately included in this study  
227 (Table 2): 15 were quantitative (cross-sectional) (25-39), three were qualitative (40-42) and five were  
228 mixed-method studies (43-47). Most of the research was conducted in resource-poor settings (20  
229 studies), mostly in sub-Saharan Africa and South Asian countries. Eighteen studies focused on the  
230 health service delivery component at the primary healthcare level, while four studies addressed the  
231 leadership and governance (Fig-2a). Eight studies were conducted in the South Asian-East Asia Region  
232 (SEAR), and only a single study (n=1) was performed in both the Region of the Americas (AMR) and  
233 the European Region (EUR). One study involved multiple nations (Benin, Eritrea, Sudan, Syria,  
234 Bhutan, Sri Lanka, Vietnam and Suriname) (Fig-2b). DM was the most studied NCDs, with 12 studies  
235 reported on it, while mental illness (MI) was the least researched, with only two studies (Fig-2c) focused  
236 on it. Thirteen studies addressed multiple NCDs, six focused on a single NCD and four did not mention  
237 any specific NCD (e.g. termed chronic diseases) (Fig-2d).

240 **[FIGURE 2 SHOULD BE INSERTED HERE]**

242 **Figure 2** Number of published studies that investigated the primary healthcare system's readiness  
243 between January 1984 and July 2021, broken down by NCD type, NCD focus and WHO region.

246 Note. AFR: African Region, AMR: Region of the Americas, SEAR: South East-Asian Region, EUR:  
247 European Region, WPR: Western Pacific Region, CRD: Chronic Respiratory Diseases, CVD:  
248 Cardiovascular Diseases, DM: Diabetes Mellitus, HTN: Hypertension, MI: Mental Illness, HSD: Health  
249 Service Delivery, HW: Health Workforce, HF: Health Financing, HIS: Health Information System,  
250 L&G: Leadership and Governance, MPK&T: Medical Products, Knowledge and Technologies.



251 Table 2 Summary – Characteristics of the studies included in this review

| Author (Year)                        | Country     | Study aims                                                                    | Study design and settings               | Sample size and participants                                  | Data collection method and tool used                               | NCDs/Risk factors studied            | Health system components' focus | Key findings/NCD Readiness                                                                                                                                                |
|--------------------------------------|-------------|-------------------------------------------------------------------------------|-----------------------------------------|---------------------------------------------------------------|--------------------------------------------------------------------|--------------------------------------|---------------------------------|---------------------------------------------------------------------------------------------------------------------------------------------------------------------------|
| Biswas et al. (2018) (38)            | Bangladesh  | To assess health facilities' readiness to manage CVD and DM                   | Quantitative; Countrywide               | 319 healthcare facilities                                     | Survey; Modified WHO SARA questionnaire                            | CVD, DM                              | HSD, HW, MPK&T                  | 58% DM, and 24.1% CVD services were available.                                                                                                                            |
| Islam et al. (2016) (29)             | Bangladesh  | To assess the availability and provision of NCD service delivery              | Quantitative; One district              | 50 health facilities                                          | Survey; Modified WHO SARA questionnaire                            | CRD, CVD, DM                         | HSD                             | 52% CRD, 73% CVD and DM 52% services were available.                                                                                                                      |
| NIPORT++ (2020) (39)                 | Bangladesh  | To assess health facilities' readiness to manage cancer, CRD, CVD, DM and HTN | Quantitative; Countrywide               | 1524 healthcare facilities                                    | Survey; Modified DHS questionnaire                                 | Cancer, CRD, CVD, DM, HTN            | HSD, HW, MPK&T                  | Availability of services varied from CCs to UHCs: cervical cancer (0.4%-37.5%), CRD (34.1%-93.9%), CVD (1.4%-69.6%), DM (0.9%-84.5%), and hypertension (3.5%-91.5%).      |
| Nyame et al. (2019) (34)             | Ghana       | To assess health facilities' capacity to implement the WHO PEN pilot          | Quantitative; Three regions             | 23 health facilities                                          | Survey; Modified WHO PEN questionnaire                             | NCD focus was not specified          | HSD, HW, HF                     | Health facilities had inadequate capacity to implement WHO-PEN interventions.                                                                                             |
| Elias et al. (2017) (43)             | India       | To investigate the local health system's preparedness for DM and HTN          | Mixed-methods; One district             | 1,149 patients, 39 healthcare staff, 30 pharmacists, 14 FGDs± | Survey; Non-validated questionnaire; Interview; IDI and FGD guides | DM, HTN                              | HSD, MPK&T                      | Public healthcare facilities had insufficient capacity for HTN and DM service delivery due to inadequate diagnostic capacity and frequent medicine stockouts.             |
| Pakhare et al. (2015) (35)           | India       | To identify facility-level gaps that affect CVD care and management           | Quantitative; 24 districts              | 85 medical officers                                           | Survey; Modified WHO PEN questionnaire                             | DM, HTN                              | HSD, HW, MPK&T                  | The community health centre had a relatively better CVD management capacity than the primary health centre but lacked sufficient equipment, medicine and human resources. |
| Panda et al. (2018) (42)             | India       | To describe the health system's response and preparedness to NCDs             | Qualitative; One district               | 13 key stakeholders                                           | Interviews; IDI guide                                              | Cancer, CVD, DM and Stroke           | HSD, HW, HF, L&G                | Health facilities were overburdened and lacked trained staff, and resources to manage NCDs.                                                                               |
| van Dijk-de Vries et al. (2016) (46) | Netherlands | To examine patients' readiness to consult psychosocial problems with nurses   | Mixed-methods; Primary care setting     | 217 diabetic patient participants                             | Survey; Non-validated questionnaire; IDI guide                     | DM                                   | Patients' readiness             | 90% of respondents had positive attitudes towards the existing diabetes consultation.                                                                                     |
| Honey et al. (2016) (28)             | New Zealand | To assess older people's readiness to e-health                                | Quantitative; Urban settings            | 263 patients in primary healthcare centres                    | Survey; Non-validated questionnaire                                | Cancer, CRD, DM, HTN, Mental Illness | HIS                             | 36% of participants sought health information from an online platform.                                                                                                    |
| Adinan et al. (2019) (25)            | Tanzania    | To assess health facilities' readiness to manage DM and HTN                   | Quantitative; Rural and urban districts | 43 health facilities, 62 healthcare workers                   | Survey; Modified WHO SARA questionnaire                            | DM, HTN                              | HSD, HW, HIS, MPK&T             | 86% DM, and 79% HTN services were available.                                                                                                                              |
| Bintabara et al. (2018) (26)         | Tanzania    | To assess health facilities' readiness to manage HTN                          | Quantitative; Countrywide               | 725 healthcare facilities                                     | Survey; Modified WHO SARA questionnaire                            | HTN                                  | HSD                             | 28% of the health facilities had outpatient HTN services.                                                                                                                 |

1  
2

|                                  |                                 |               |                                                                                                                       |                                        |                                                                        |                                                                          |                                      |                              |                                                                                                                                                                                                                                                   |
|----------------------------------|---------------------------------|---------------|-----------------------------------------------------------------------------------------------------------------------|----------------------------------------|------------------------------------------------------------------------|--------------------------------------------------------------------------|--------------------------------------|------------------------------|---------------------------------------------------------------------------------------------------------------------------------------------------------------------------------------------------------------------------------------------------|
| 3<br>4<br>5                      | Peck et al. (2014) (36)         | Tanzania      | To assess NCDs burden and investigate facilities' readiness to manage DM and HTN                                      | Quantitative; Urban and rural settings | 335 healthcare workers                                                 | Modified WHO SARA questionnaire                                          | DM, HTN                              | HSD, MPK&T                   | Most first-line healthcare facilities lacked guidelines, diagnostic equipment, trained staff and effective reporting systems.                                                                                                                     |
| 6<br>7<br>8<br>9<br>10           | Aekplakorn et al. (2005) (40)   | Thailand      | To assess primary healthcare providers' readiness to manage CVD along with community members perception and knowledge | Qualitative; Rural district            | 18 CVD patients, 33 community members, 29 health workers/professionals | Semi-structured interview; IDI, KII and FGD guides                       | CVD                                  | HSD, MPK&T                   | Community members lacked minimal knowledge of the symptoms and signs of heart attack or stroke. Healthcare workers had limited skills to manage heart disease, while emergency care hospitals were insufficiently equipped to treat CVD patients. |
| 11<br>12<br>13                   | Katende et al. (2015) (30)      | Uganda        | To assess the readiness of CD-related services                                                                        | Quantitative; Urban and rural settings | 28 health facilities, 222 health workers                               | Survey; Modified WHO SARA questionnaire                                  | CRD, CVD, DM, Epilepsy, HTN, HIV     | HSD, HW, MPK&T               | Most primary care facilities had inadequate capacity to manage CDs                                                                                                                                                                                |
| 14<br>15<br>16<br>17             | Musinguzi et al. (2015) (32)    | Uganda        | To assess health facilities' capacity to manage hypertension                                                          | Quantitative; Two districts            | 126 public & private health facilities, 271 healthcare workers         | Survey; Non-validated questionnaire                                      | HTN                                  | HSD, MPK&T                   | Nearly 93% health facilities managed HTN services and all of them lacked trained staff, guideline, supplies, and diagnostic equipment.                                                                                                            |
| 18<br>19<br>20<br>21             | Volk et al. (2015) (37)         | USA           | To examine clinicians' readiness to implement lung cancer screening programmes                                        | Quantitative; Medical attendees        | 350 participants                                                       | Survey; Non-validated questionnaire                                      | Cancer                               | HSD (screening)              | 50% clinicians planned to refer eligible patients for lung cancer screening.                                                                                                                                                                      |
| 22<br>23<br>24<br>25<br>26<br>27 | Duong et al. (2019) (27)        | Vietnam       | To explore NCD service delivery availability, readiness and utilisation                                               | Quantitative; Rural settings           | 89 community health centres                                            | Survey; Modified WHO SARA questionnaire                                  | DM, Cancer, CRD, HTN, Mental Illness | HSD, HW                      | 25% of the health facilities had NCD services.                                                                                                                                                                                                    |
| 28<br>29<br>30                   | Kien et al. (2018) (41)         | Vietnam       | To explore responsiveness of commune health stations in urban settings to NCDs                                        | Qualitative; Two districts             | 19 healthcare staff                                                    | Interviews; IDI guide                                                    | NCD focus was not specified          | HSD, HW, HIS, MPK&T, HF, L&G | Healthcare professionals had limited knowledge about the national NCD strategy and lacked NCD-specific training and skills.                                                                                                                       |
| 31<br>32<br>33<br>34<br>35<br>36 | Meiqari et al. (2020) (44)      | Vietnam       | To describe the delivery and organisation of HTN care in primary healthcare settings                                  | Mixed-methods; Rural and urban setting | 90 healthcare staff, 29 hypertensive patients                          | Survey; Modified WHO SARA questionnaire; Semi-structured interview guide | HTN                                  | HW, MPK&T                    | District-level health facilities had HTN services; however, capacity of facilities across districts to monitor prescription refills and disease for HTN patients varied.                                                                          |
| 37<br>38<br>39<br>40<br>41<br>42 | Thi Thuy Nga et al. (2017) (45) | Vietnam       | To describe commune health stations' readiness for NCD prevention and control                                         | Mixed-methods; One district            | 20 commune health stations                                             | Survey; Modified WHO SARA questionnaire; IDI and FGD guides              | Cancer, CRD, DM, HTN                 | HSD, HW, HIS, MPK&T, HF, L&G | Commune health stations (CHSs) had limited capacity for NCD screening, diagnosis and treatment services.                                                                                                                                          |
| 43<br>44<br>45<br>46             | Van Minh et al. (2014) (47)     | Vietnam       | To describe the primary care system's readiness for NCDs                                                              | Mixed-methods; One district            | Health facilities and staff±                                           | Survey; Non-validated questionnaire; Interview; IDI guide                | NCD focus was not specified          | HSD, HW, HIS, MPK&T, HF, L&G | Primary healthcare facilities had limited NCD management capacity and service integration.                                                                                                                                                        |
|                                  | Mutale et al. (2018) (33)       | Zambia        | To assess the health system's readiness to address NCDs                                                               | Quantitative; Three districts          | 46 primary healthcare facilities                                       | Survey; Modified WHO PEN questionnaire                                   | NCD focus was not specified          | HSD                          | Only the first-level hospitals had a mean readiness index score (=>70%) for managing NCDs.                                                                                                                                                        |
|                                  | Mendis et al. (2012) (31)       | Multi-country | To evaluate primary care facilities' capacity for the major NCDs                                                      | Quantitative; Multi-country*           | 90 primary healthcare facilities                                       | Survey; Modified WHO PEN questionnaire                                   | Cancer, CRD, CVD, DM                 | HSD, HW, HIS, MPK&T, HF, RS  | Primary care facilities had inadequate financing, basic technologies and medicines, medical information systems and health workforce                                                                                                              |

252

1  
2  
3 253 **Note.** CVDs: Cardiovascular Diseases, DM: Diabetes Mellitus, DHS: Demographic and Health Surveys, FGD: Focus Group Discussion, HTN: Hypertension, IDI: In-depth  
4 254 Interviews, KII: Key Informant Interview, HSD: Health Service Delivery, HW: Health Workforce, HIS: Health Information System, MPK&T: Medical Products, Knowledge and Technologies,  
5 255 HF: Health Financing, CRDs: Chronic Respiratory Diseases, NCD: Non-communicable Disease, WHO: World Health Organization, LMIC: Low- and Middle-Income Countries, L&G:  
6 256 Leadership and Governance, RS: Referral System, WHO SARA: WHO Service Availability and Readiness Assessment, WHO PEN: WHO Package of Essential Non-  
7 257 communicable Disease Interventions

8  
9 258 \*Multi-country includes Benin, Bhutan, Eritrea, Sri Lanka, Sudan, Suriname, Syria and Vietnam

10 259 †The number of participants/sample size was not specified.

11  
12 260 ††National Institute of Population Research and Training  
13  
14  
15  
16  
17  
18  
19  
20  
21  
22  
23  
24  
25  
26  
27  
28  
29  
30  
31  
32  
33  
34  
35  
36  
37  
38  
39  
40  
41  
42  
43  
44  
45  
46

## 261 **Health service delivery**

262 Of the 23 studies, 18 addressed issues related to the health service delivery system's readiness in  
263 preventing and managing NCDs at the primary healthcare level. Eleven of the 18 studies were  
264 quantitative studies, assessing primary healthcare facilities' readiness in implementing the WHO SARA  
265 reference manual (25-27, 29, 30, 36, 38, 45) or WHO PEN interventions (33-35). Three papers adopted  
266 the qualitative approach (40-42), while another three used the mixed-method approach (43, 45, 47).  
267 Four studies focused on a single NCD: DM, CVD (40) or HTN (26, 32). Five papers studied two NCDs  
268 (25, 35, 36, 38, 43), while seven investigated multiple NCDs and risk factors (27, 30, 31, 39, 41, 42,  
269 48). However, two articles did not specify the NCDs that were evaluated (34, 47). Most of the studies  
270 found that healthcare facilities had insufficient capacity to deliver NCD prevention, care and treatment  
271 at the primary level. Among the NCDs, a higher level of readiness at the primary healthcare level was  
272 reported for hypertension prevention and management. The availability of hypertension services at  
273 healthcare facilities was reported to be 92.9% in Uganda (32) and 86% in Tanzania (25); however, one  
274 study found that hypertension preparedness was only 28% in Tanzania's outpatient care (26). A mixed-  
275 methods study in Thailand revealed that commune health stations were significantly prepared to manage  
276 HTN (44). The services readiness for CVD (47.8%), and DM (50%), were reported at the upazila health  
277 complex (UHC) in 2014 in Bangladesh (29, 38). However, the most recent data reported the availability  
278 of services largely varied from community clinic (CC) to 'UHC' for cervical cancer (0.4%-37.5%),  
279 CRD (34.1%-93.9%), CVD (1.4%-69.6%), DM (0.9%-84.5%), and, hypertension (3.5%-91.5%) (39).  
280 In Vietnam, only 25% of commune health centres were equipped to prevent, diagnose and treat major  
281 NCDs, with a noticeably lower utilisation rate of services by the users (27). Capacity for managing DM  
282 was predominantly low across all studies; however, one study in Tanzania (25) found that care for  
283 diabetes mellitus was available in 79% of healthcare facilities. Moreover, a lower level of readiness for  
284 managing CVD was reported across countries (31, 40, 42, 45). Qualitative studies conducted in  
285 Thailand (40) and India (43) noted facilities' low-level preparedness to manage HTN, DM and CVD,  
286 with healthcare facilities/programmes lacking effective community engagements and limited support

1  
2  
3 287 from the national programmes. In Kien et al.'s 2018 study conducted in Vietnam, one of the district-  
4  
5 288 level health staff shared the following:  
6  
7

8 289

9  
10 290 [In our district] we implemented the hypertension programme for only four communes and  
11  
12 291 implemented the diabetes programme for four other communes [among 18 communes]. We do  
13  
14 292 not have any NCD programmes for the rest of the communes (41).  
15  
16

17 293 In a cross-sectional study conducted in Madhya Pradesh, India, the preparedness level for DM and HTN  
18  
19 294 was reported to be slightly high (35). However, inadequate capacity was found for managing the  
20  
21 295 common NCDs in a qualitative study in Odisha and Kerala, India (42). Lower levels of readiness for  
22  
23 296 major NCDs have also been commonly reported in Zambia (33) and Ghana (34).  
24  
25

26 297 Overall, the delivery of NCD services was affected by multiple factors and revealed to be insufficient  
27  
28 298 at the primary healthcare level. Inadequate and ill-equipped healthcare facilities were the most common  
29  
30 299 issues hampering service delivery (25, 27, 31-35, 43). Moreover, notable key barriers include patients'  
31  
32 300 lack of self-management education and knowledge (25), primary-level healthcare professionals' limited  
33  
34 301 NCD management skills and national NCD strategies (25, 41), insufficient NCD service management  
35  
36 302 and implementation capacity of local-level healthcare organisations (26, 47), a weak referral and  
37  
38 303 follow-up system (30, 31), poor adherence to clinical guidelines (25, 30, 32, 36), inadequate screening  
39  
40 304 opportunity (45), lack of information-education-community material (45) and the healthcare facility's  
41  
42 305 rural location.  
43  
44

45 306

### 46 47 48 307 **Healthcare workforce**

49  
50  
51 308 Twelve of the studies reviewed reported a healthcare workforce issue related to NCD services and care.  
52  
53 309 According to these papers, a common bottleneck for NCD services is insufficient primary-level  
54  
55 310 healthcare professionals. One cross-sectional study in Tanzania reported only 53% and 15% of  
56  
57 311 healthcare facilities had trained health professionals to manage HTN and DM, respectively (25). In  
58  
59 312 Thailand (40) and Vietnam (45, 47), there was an acute lack of trained healthcare staff to manage CVD.  
60

1  
2  
3 313 Moreover, a study conducted in Uganda found that only 26% and 16% of primary healthcare staff had  
4  
5 314 an adequate level of knowledge to manage DM and HTN outpatients, respectively (30). This study also  
6  
7 315 revealed that medical doctors had a higher level of knowledge (85% for HTN and 8% for DM) than  
8  
9 316 nurses (8% for HTN and 4% for DM) (30). One study in Vietnam reported that only 9% of primary  
10  
11 317 healthcare facilities in rural and urban locations had five categories of human resources (medical doctor,  
12  
13 318 assistant doctor, nurse, midwife and pharmacist) to deliver HTN services (44). The shortage of trained  
14  
15 319 healthcare staff (at least one staff received in-service training in the last 24 months before the data  
16  
17 320 collection date) was reported at the primary healthcare in Bangladesh (39). The trained staff for cervical  
18  
19 321 cancer (29% trained staff at the UHCs, but no trained staff in CCs and union-level facilities), CRD (4%  
20  
21 322 union-level facilities, 11% CCs, and 29% UHCs), CVD (7% union-level facilities, 15% CCs, and 40%,  
22  
23 323 UHCs), DM (3% union-level facilities, 14% CCs, and 28% UHCs), and hypertension (6% union-level  
24  
25 324 facilities, 10% CCs, and 39% UHCs) were reported (39). According to a multi-country study,  
26  
27 325 physicians at primary healthcare facilities were only available in two of the eight participating nations,  
28  
29 326 while nurses and healthcare assistants were the key professionals for NCD services in the remaining six  
30  
31 327 countries (31). A study in Ghana found that more than half of the healthcare centres lacked at least one  
32  
33 328 medical doctor and nurse trained in NCDs (34). In India, while two medical officers were available on  
34  
35 329 average at community health centres to manage DM, CVD, HTN and cancer, this number was lowest  
36  
37 330 (less than half) in primary healthcare centres (35). In qualitative studies conducted in India (42) and  
38  
39 331 Vietnam (41), insufficient healthcare staff jeopardised NCD services in primary care facilities. An NCD  
40  
41 332 programme officer in Odisha, India and a national-level health worker in Vietnam shared their  
42  
43 333 respective thoughts:

44  
45  
46  
47  
48 334 In a big community health centre like ours, there should be more health workforce, and there  
49  
50 335 should be a special training programme for all the health workers (42).

51  
52  
53 336 For the health workforce at commune health stations, some facilities lack human resources  
54  
55 337 and/or capacity. They must be strengthened in their capacity to provide services for NCD  
56  
57 338 prevention, consultation, early detection and management. The reason for this is that we have  
58  
59 339 not implemented NCD services systematically at primary healthcare facilities (41).  
60

1  
2  
3 340  
4  
56 341 **Health financing**  
7

8 342 Seven studies found that inadequate funding/budget support from the national healthcare programme  
9 343 compromised effective NCD service and care at the primary healthcare level. Furthermore, the absence  
10 344 or limitation of healthcare insurance coverage jeopardised NCD services and care. One study in India  
11 345 reported that less than 3% of households had insurance coverage (43). A study in Ghana revealed that  
12 346 healthcare financing is organised by the government as the ‘National Health Insurance Scheme’, and  
13 347 only those who paid the premium received its benefits (34). Limited public financial/budgetary support  
14 348 has also been identified as a major barrier to NCD services in primary healthcare in Vietnam (45, 47).  
15 349 A national-level health worker in Vietnam conveyed the following to Kien et al. in 2018:

16 350 The budget for NCD primary health care services is extremely limited; [funding is] mainly  
17 351 through national target programmes on NCDs, but the programmes have been reduced. There  
18 352 are some barriers to health insurance reimbursement for NCDs at the primary health care level  
19 353 (41).

20 354 Similarly, in a qualitative study, a medical officer from Odisha, India shared his observation:

21 355 Since there is no existing system, funds do not reach the grassroots level. There is no funding  
22 356 (42).

23  
24  
25  
26  
27  
28  
29  
30  
31  
32  
33  
34  
35  
36  
37  
38  
39  
40  
41  
42 357  
43  
4445 358 **Access to medical products, knowledge and technologies**  
46

47 359 Across countries and regions, a lack of supply-side factors, such as medical products and knowledge  
48 360 and technologies to prevent and manage NCDs, has been widely reported. Fifteen studies reported  
49 361 inadequate or interrupted access to supplies and technologies at the primary healthcare level, which are  
50 362 vital for diagnosing and treating NCDs. In Bangladesh, the availability of medicine widely varied at the  
51 363 UHCs based on their types for DM (metformin 38.1%, glibenclamide 7.4%), CRD (salbutamol 91.6%,  
52 364 epinephrine 0.3%), CVD (amiodipine/nifedipine 41.5%, aspirin 2.6%), and HTN

1  
2  
3 365 (amlodipine/nifedipine 44.7%, thiazide 1.4%), but no supply in the CCs were reported (39). In India,  
4  
5 366 the essential drugs for the management of HTN (beta-blockers and calcium channel blockers) were  
6  
7 367 available at most of the primary health centres (PHCs) and community health centres; however, other  
8  
9 368 drugs (except metformin) were largely unavailable across facilities that resulted in 90% of NCD patients  
10  
11 369 in India to rely on private providers/facilities for NCD service and care (35). More than 60% of PHC-  
12  
13 370 level facilities faced a shortage of essential DM medicine, with over 30% of PHCs having a medicine  
14  
15 371 stockout of more than six months. Only 38% of PHCs had functional laboratory facilities (43).  
16  
17 372 According to a study conducted in Tanzania, 50% of health centres, 24% of dispensaries and 80% of  
18  
19 373 hospitals had HTN and DM medicines on hand; however, more than one-third of these locations lacked  
20  
21 374 basic laboratory facilities (25). A qualitative study in Vietnam (41) and a qualitative multi-country  
22  
23 375 investigation (Benin, Bhutan, Eritrea, Sri Lanka, Sudan, Suriname, Syria and Vietnam) (31) likewise  
24  
25 376 reported the shortage of medicine and basic diagnostic facilities at primary healthcare facilities.  
26  
27 377 Moreover, basic amenities and equipment for NCDs were in short supply in Ugandan healthcare  
28  
29 378 facilities (hospitals and healthcare centres), with more than half of them lacking the recommended  
30  
31 379 antihypertensive drug and nearly 30% lacking a blood pressure device (32). Likewise, Tanzanian  
32  
33 380 healthcare facilities reported a shortage of the recommended medicine and supplies required for HTN  
34  
35 381 and DM service and care (36). Similarly, a mixed-method study found a scarcity of medical products  
36  
37 382 and equipment for CRD, DM, cancer and HTN in Vietnam (45). However, basic equipment and  
38  
39 383 diagnostic facilities such as stethoscope (93.2% CCs, 96.9% UHCs), blood pressure apparatus (85.6%  
40  
41 384 CCs, 95.4% UHCs), adult scale (90.9% CCs, 82.9% UHCs), blood glucose testing (22.2% CCs, 48.9%  
42  
43 385 UHCs), urine protein (0% CCs, 36.2 % UHCs), and urine glucose (0% CCs, 30.4 % UHCs) were  
44  
45 386 available in Bangladesh (39).  
46  
47  
48  
49  
50  
51

387

### 388 **Health information system**

389 Studies that assessed the health information system's readiness were limited. Only five papers addressed  
390 the health information system required for optimising NCD care at the primary healthcare level (25, 31,  
391 41, 45, 47). These studies extensively reported on weak health information systems for detecting,



1  
2  
3 392 treating and monitoring NCD patients in primary healthcare settings. Furthermore, only 52.9% of  
4  
5 393 primary healthcare facilities in Tanzania were prepared to collect, analyse and use local-level data for  
6  
7 394 HTN and DM services (25). According to a multi-country survey, 85% of healthcare facilities created  
8  
9 395 paper-based (patient register) individual-level information for patients who attended the facilities, but  
10  
11 396 only half of that information was used at the follow-up visit (31). Weak and ineffective health  
12  
13 397 information system management and inadequate NCD information, such as a lack of population-based  
14  
15 398 NCD-related data on risk factors, mortality, disability and referral systems at the primary healthcare  
16  
17 399 level, have been identified as crucial barriers to managing NCDs in Vietnam (41, 45).

20  
21 400

### 23 401 **Leadership and governance**

24  
25  
26 402 Four studies investigated issues of leadership and stewardship in the management of NCDs in primary  
27  
28 403 healthcare (41, 42, 45, 47). The research reported a lack of coordination among stakeholders and  
29  
30 404 departments in implementing nationally designed NCD programmes/interventions. A qualitative study  
31  
32 405 in India discovered weak inter-departmental coordination between various government departments  
33  
34 406 (e.g. mental health programme and tobacco control programme), which resulted in poor NCD outcomes  
35  
36 407 at the primary care level (42). The primary care-level NCD managers lacked knowledge of Vietnam's  
37  
38 408 national NCD strategy or policies affecting targeted interventions for cancer, CVDs and diabetes (41).  
39  
40 409 Limited knowledge of NCD management strategy and insufficient leadership capacity were highlighted  
41  
42 410 among front-line healthcare staff (41). Furthermore, a lack of interaction between private and public  
43  
44 411 providers and stakeholders was reported for NCD prevention/management activities in Vietnam (45).  
45  
46 412 A mixed-method study found that Vietnam's nationally targeted NCD management and control  
47  
48 413 programme lacked leadership and governance capacity (47).

50  
51 414

### 54 415 **Community perspective**

55  
56  
57 416 Only two studies, conducted in the Netherlands and New Zealand, explored community perspectives  
58  
59 417 on patients' capacity for using healthcare information, self-management and sharing problems when  
60

1  
2  
3 418 seeking aid to manage NCDs at the primary healthcare level. A mixed-method study in the Netherlands  
4  
5 419 (46) showed that, during a consultation, people with diabetes had a low-level ability to share  
6  
7 420 psychological issues with healthcare providers at the primary healthcare level. In New Zealand, the  
8  
9 421 readiness of patients with NCDs (cancer, chronic pain, diabetes and mental health problems) was low,  
10  
11 422 with only 36% of them seeking health-related information from digitalised sources (28). This demand-  
12  
13 423 side perspective was not addressed in studies from low- and middle-income countries.  
14  
15

16 424

### 19 425 **Quality of included studies / Quality assessment**

21 426 Nearly three-fifth (61%) of the studies were of good quality (MMAT score of 75) (Table 1): one paper  
22  
23 427 (4%) had an MMAT score of 25 (low quality), eight (35%) scored 50 (medium quality), eleven (48%)  
24  
25 428 received 75 (good quality) and three (13%) reached 100 (high quality). No study had an MMAT score  
26  
27 429 of 0 (poor quality).  
28  
29

30 430

31 431

### 36 432 **Discussion**

37  
38 433 This review appraised available evidence on health system readiness for NCDs at the primary healthcare  
39  
40 434 level. The key findings of this study were that health systems at the primary healthcare level were  
41  
42 435 inadequately prepared for NCD prevention and management, and that readiness was poorly understood.  
43  
44 436 Health system readiness was examined from the providers' perspectives, which is specifically focused  
45  
46 437 on the availability of infrastructures and supply of resources (e.g. medicine, basic amenities, medical  
47  
48 438 products and technologies) as devised in the WHO SARA methodology or WHO PEN interventions.  
49  
50 439 This may have narrowed the 'systems thinking' approach, which is a core philosophical basis that  
51  
52 440 incorporates various elements and their interactions and interconnectedness to function as a system (19).  
53  
54 441 Viewing the health system from this constricted sense categorically failed to include people's (service  
55  
56 442 users') dimensions, which is an essential consideration for a well-functioning and inclusive health  
57  
58 443 system. One plausible reason for predominantly analysing the health system from the supply-side  
59  
60

1  
2  
3 444 perspective was the widespread acceptance of the WHO health system framework and its broader  
4  
5 445 applications in individual studies. Over the past years, the ‘building block’ approach appeared as a  
6  
7 446 dominant health system method globally (49), supporting the existing trend of assessing the health  
8  
9 447 system from the supply-side perspective. Thus, the demand-side perspectives of health system readiness  
10  
11 448 for NCDs warrant extensive investigation. Future research may focus on the demand-side aspects of the  
12  
13 449 health system’s readiness, such as community characteristics and associated determinants needed to  
14  
15 450 establish an effective and inclusive health system to respond to the NCD epidemic.  
16  
17  
18 451

19  
20  
21 452 This review demonstrated that almost all countries’ primary healthcare systems have suffered from  
22  
23 453 inadequate supply-side responses to medicine, technologies, equipment, amenities, trained healthcare  
24  
25 454 professionals, health information and leadership and stewardship. The ill-equipped health system may  
26  
27 455 result from insufficient financing mobilised through international and domestic channels and a lack of  
28  
29 456 policy priority in responding to NCDs (50-52). Among the NCDs addressed by the studies in this  
30  
31 457 review, DM and HTN received the most attention in the current literature. Hence, other major NCDs  
32  
33 458 such as CVD, CRD and cancer, which are prioritised by the WHO, remain largely under-researched.  
34  
35 459 The focus on DM and HTN may be due to multiple factors, including increasing prevalence and  
36  
37 460 associated determinants/risk factors for other NCDs in low- and middle-income countries, a nationwide  
38  
39 461 vertical programme, individual-level professional capacity and greater resource mobilisation (53-55),  
40  
41 462 all of which have facilitated DM and HTN care, management and research. Moreover, the integrated  
42  
43 463 model for DM and HTN care has widely been considered in the low-and middle-income countries that  
44  
45 464 accelerated the provision of effective and equitable health service delivery at the primary healthcare  
46  
47 465 level, which would have helped to address the rising burden of them with accessible, equitable, and  
48  
49 466 cost-effective interventions (56-58). This review revealed that at the primary healthcare level, health  
50  
51 467 system readiness for major NCDs was primarily concentrated on the diagnosis and treatment aspects.  
52  
53 468 However, readiness for health promotion and preventive interventions, provision of palliative care,  
54  
55 469 screening, identification of risk factors, self-management and health education have remained under-  
56  
57 470 investigated and of less priority (59, 60). As such, primary and secondary prevention of NCDs was  
58  
59  
60

1  
2  
3 471 emphasised in the WHO's NCD prevention and control strategy in 2011 (61) and has been highlighted  
4  
5 472 in the current literature to reduce NCD-related morbidities and deaths (62-64). Preventive and health  
6  
7 473 promotional activities on key NCD risk factors, (61, 65) such as tobacco consumption, salt intake,  
8  
9 474 physical inactivity, harmful alcohol use and unhealthy diet, stress that these can be addressed at the  
10  
11 475 primary healthcare level to improve NCD outcome. The potential for a well-prepared health system is  
12  
13 476 realised when promotional and preventive services are adequately provided at the primary healthcare  
14  
15 477 level (66, 67). Lack of a comprehensive prevention and management approach led us to hypothesise  
16  
17 478 that the full potential of the health system's response to NCDs may have been hindered at the primary  
18  
19 479 healthcare level. Majority of the studies in this review had good or high quality. However, a large  
20  
21 480 proportion of the study reflected inexplicit evidence due to the methodology, small sample size, bias,  
22  
23 481 and incomplete information. A few quantitative studies lacked sufficient details about the participants'  
24  
25 482 selection criteria, standard criteria for minimizing bias, and use of non-validated questionnaires with a  
26  
27 483 relatively small sample size that might affect the scope of generalizability of the findings (27, 29, 32,  
28  
29 484 34, 35). One mixed-method study was rated low quality due to the homogeneous sample and insufficient  
30  
31 485 information about the data analysis (47). The rest of the mixed-method studies included in the review  
32  
33 486 had a more representative sample size and methodological rigors. The majority of the included studies  
34  
35 487 used the WHO's health system framework as an analytical basis to identify the health system  
36  
37 488 components. However, some studies lacked a deeper analysis of the interplay and interconnectedness  
38  
39 489 between different health system components. Despite these limitations, this study provides important  
40  
41 490 information regarding current evidence on the readiness of the primary healthcare system for NCDs.  
42  
43 491 Additionally, most of the selected studies in this review were conducted in resource-poor settings,  
44  
45 492 primarily in sub-Saharan African and South East Asian countries. The smaller number of studies in  
46  
47 493 developed countries may be explained by their adoption of a specialised disease management strategy,  
48  
49 494 which lessens the focus on comprehensive management of NCDs at the primary healthcare level (68).  
50  
51 495 An extensive investigation of community characteristics and associated factors may be necessary for  
52  
53 496 establishing a well-functioning and more responsive health system to respond to NCDs (24).  
54  
55  
56  
57  
58  
59 497 **Strengths and limitations**  
60

1  
2  
3 498 This review's main strength was an inclusive data synthesis informed by the health system dynamics  
4  
5 499 framework, which offers a deeper and more comprehensive (both supply-side and demand-side factors)  
6  
7 500 understanding of primary healthcare system readiness for NCDs. Conducting An extensive systematic  
8  
9 501 search of literature with hand-searching references and expert advice increased the validity and  
10  
11 502 trustworthiness of this review's findings. On the other hand, one of its limitations was that a few studies  
12  
13 503 that reported health system readiness at combined primary and secondary healthcare levels were  
14  
15 504 excluded. Moreover, the selected studies had heterogeneous study designs, methods and techniques,  
16  
17 505 and focused on a variety of health system components, preventing meta-analysis. Another limitation  
18  
19 506 was that studies containing relevant information published in languages other than English have been  
20  
21 507 excepted, which may have influenced the results of this review.  
22  
23  
24  
25 508

### 27 509 **Conclusion and future direction**

29  
30 510 This review demonstrated that health systems at the primary healthcare level are insufficiently prepared  
31  
32 511 for NCD prevention and management, especially for CVD, CRD and cancer. The existing health system  
33  
34 512 response was characterised by insufficient 'supply-side' factors (i.e. supply of medicine, equipment and  
35  
36 513 technology), a lack of appropriate NCD management strategies and guidelines, a weak health  
37  
38 514 information system, limited resources, uncoordinated local-level stewardship and leadership and a  
39  
40 515 shortage of human resources. One of the notable findings was that the primary healthcare system's  
41  
42 516 readiness over the years was evaluated from the 'supply-side' perspective; hence, there is a significant  
43  
44 517 knowledge gap in the literature from the 'demand-side' standpoint. This observation may be useful for  
45  
46 518 future research into users' views on NCD management at the primary healthcare level, including NCD  
47  
48 519 management practice, knowledge, attitude, care-seeking behaviour, adherence to treatment, self-  
49  
50 520 management and coping strategies.  
51  
52  
53  
54 521  
55  
56 522  
57  
58  
59 523  
60

1  
2  
3 524  
4  
56 525 **Author Contributions**  
7

8 526 AK, NK and BB created the manuscript. AK and LR led the literature search. AK, NK, RI and BB  
9 527 screened the literature and completed the mapping. AK led the drafting process, while NK, RI and BB  
10 528 provided substantial input. All authors read and approved the final manuscript.  
11  
12  
13  
14

15 529  
1617  
18 530 **Funding**  
19

20  
21 531 This project received no external funding.  
22  
23

24 532  
2526 533 **Data availability statement**  
27

28  
29 534 No additional data are available.  
30  
31

32 535  
3334 536 **Competing interest**  
35

36  
37 537 The authors declare that they have no competing interests.  
38  
39

40 538  
41  
42  
43  
44  
45  
46  
47  
48  
49  
50  
51  
52  
53  
54  
55  
56  
57  
58  
59  
60

539 **References**

- 540 541 1. World Health Organization. Noncommunicable diseases: Key facts 2021 [Available from:  
542 <https://www.who.int/news-room/fact-sheets/detail/noncommunicable-diseases>.
- 543 544 2. Marrero SL, Bloom DE, Adashi EY. Noncommunicable diseases: a global health crisis in a new  
545 world order. *Jama*. 2012;307(19):2037-8.
- 546 547 3. Beaglehole R, Epping-Jordan J, Patel V, Chopra M, Ebrahim S, Kidd M, et al. Improving the  
548 prevention and management of chronic disease in low-income and middle-income countries: a  
549 priority for primary health care. *Lancet*. 2008;372(9642):940-9.
- 550 551 4. Capizzi S, De Waure C, Boccia S. Global burden and health trends of non-communicable  
552 diseases. *A systematic review of key issues in public health*: Springer; 2015. p. 19-32.
- 553 554 5. Bloom DE, Cafiero E, Jané-Llopis E, Abrahams-Gessel S, Bloom LR, Fathima S, et al. The global  
555 economic burden of noncommunicable diseases. *Program on the Global Demography of Aging*;  
556 2012.
- 557 558 6. Assembly UG. High Level Meeting on Prevention and Control of Non-Communicable  
559 Diseases: Political Declaration of the High-Level Meeting of the General Assembly on the Prevention  
560 and Control of Non-Communicable Diseases. DocumentA/66/L. 1. New York, NY: United Nations  
561 General Assembly, 2011. 2016.
- 562 563 7. World Health Organization. Global action plan for the prevention and control of  
564 noncommunicable diseases 2013-2020. 2013.
- 565 566 8. World Health Organization. World health statistics 2016: monitoring health for the SDGs  
567 sustainable development goals: World Health Organization; 2016.
- 568 569 9. NCD Countdown 2030: pathways to achieving Sustainable Development Goal target 3.4.  
570 *Lancet*. 2020.
- 571 572 10. Dodd R, Palagyi A, Jan S, Abdel-All M, Nambiar D, Madhira P, et al. Organisation of primary  
573 health care systems in low- and middle-income countries: review of evidence on what works and  
574 why in the Asia-Pacific region. *BMJ Glob Health*. 2019;4(Suppl 8):e001487.
- 575 576 11. Rohde J, Cousens S, Chopra M, Tangcharoensathien V, Black R, Bhutta ZA, et al. 30 years  
577 after Alma-Ata: has primary health care worked in countries? *Lancet*. 2008;372(9642):950-61.
- 578 579 12. Organization WH. Primary health care: report of the International Conference on primary  
580 health care, Alma-Ata, USSR, 6-12 September 1978: World Health Organization; 1978.
- 581 582 13. Alvarez FN, Leys M, Mérida HE, Guzmán GE. Primary health care research in Bolivia:  
583 systematic review and analysis. *Health Policy Plan*. 2016;31(1):114-28.
- 584 585 14. Bitton A, Ratcliffe HL, Veillard JH, Kress DH, Barkley S, Kimball M, et al. Primary Health Care  
586 as a Foundation for Strengthening Health Systems in Low- and Middle-Income Countries. *J Gen  
587 Intern Med*. 2017;32(5):566-71.
- 588 589 15. Dineen-Griffin S, Garcia-Cardenas V, Williams K, Benrimoj SI. Helping patients help  
590 themselves: A systematic review of self-management support strategies in primary health care  
591 practice. *PLoS One*. 2019;14(8):e0220116.
- 592 593 16. Albelbeisi AH, Albelbeisi A, El Bilbeisi AH, Taleb M, Takian A, Akbari-Sari A. Public Sector  
594 Capacity to Prevent and Control of Noncommunicable Diseases in Twelve Low- and Middle-Income  
595 Countries Based on WHO-PEN Standards: A Systematic Review. *Health Serv Insights*.  
596 2021;14:1178632920986233.
- 597 598 17. Kabir A, Karim MN, Billah B. Primary healthcare system readiness to prevent and manage  
599 non-communicable diseases in Bangladesh: a mixed-method study protocol. *BMJ Open*.  
600 2021;11(9):e051961.
- 601 602 18. Organization WH. Everybody's business--strengthening health systems to improve health  
603 outcomes: WHO's framework for action. 2007.
- 604 605 19. Criel Bart. ON, Pirad M., Van der Venet J.,. *Basic Concepts in Public Health*. Antwerp:  
606 Institute of Tropical Medicine; 2013.

- 1  
2  
3 589 20. Mounier-Jack S, Griffiths UK, Closser S, Burchett H, Marchal B. Measuring the health systems  
4 590 impact of disease control programmes: a critical reflection on the WHO building blocks framework.  
5 591 BMC Public Health. 2014;14:278.
- 6 592 21. Van Olmen J, Criel B, Van Damme W, Marchal B, Van Belle S, Van Dormael M, et al. Analysing  
7 593 health systems dynamics. A framework. *Studies in Health Services Organisation & Policy*. 2012;28(2).  
8 594 22. Moher D, Liberati A, Tetzlaff J, Altman DG. Preferred reporting items for systematic reviews  
9 595 and meta-analyses: the PRISMA statement. *PLoS medicine*. 2009;6(7):e1000097.
- 10 596 23. Hong QN, Pluye P, Fàbregues S, Bartlett G, Boardman F, Cargo M, et al. Mixed methods  
11 597 appraisal tool (MMAT), version 2018. Registration of copyright. 2018;1148552:10.
- 12 598 24. Olmen JV, Criel B, Bhojani U, Marchal B, Belle SV, Chengé MF, et al. The Health System  
13 599 Dynamics Framework: The introduction of an analytical model for health system analysis and its  
14 600 application to two case-studies. *Health, Culture and Society*. 2012;2(1):1-21.
- 15 601 25. Adinan J, Manongi R, Temu GA, Kapologwe N, Marandu A, Wajanga B, et al. Preparedness of  
16 602 health facilities in managing hypertension & diabetes mellitus in Kilimanjaro, Tanzania: a cross  
17 603 sectional study. *BMC Health Services Research*. 2019;19(1):537.
- 18 604 26. Bintabara D, Mpondo BCT. Preparedness of lower-level health facilities and the associated  
19 605 factors for the outpatient primary care of hypertension: Evidence from Tanzanian national survey.  
20 606 *PLoS One*. 2018;13(2):e0192942.
- 21 607 27. Duong DB, Minh HV, Ngo LH, Ellner AL. Readiness, Availability and Utilization of Rural  
22 608 Vietnamese Health Facilities for Community Based Primary Care of Non-communicable Diseases: A  
23 609 CrossSectional Survey of 3 Provinces in Northern Vietnam. *International Journal of Health Policy &  
24 610 Management*.8(3):150-7.
- 25 611 28. Honey M, Waterworth S, Aung H. Older Consumers' Readiness for e-Health in New Zealand.  
26 612 *Studies in Health Technology & Informatics*.225:178-82.
- 27 613 29. Islam MR, Laskar SP, Macer D. A Study on Service Availability and Readiness Assessment of  
28 614 Non-Communicable Diseases Using the WHO Tool for Gazipur District in Bangladesh. *Bangladesh  
29 615 Journal of Bioethics*. 2016;7(2):1-13.
- 30 616 30. Katende D, Mutungi G, Baisley K, Biraro S, Ikoona E, Peck R, et al. Readiness of Ugandan  
31 617 health services for the management of outpatients with chronic diseases. *Tropical Medicine &  
32 618 International Health*.20(10):1385-95.
- 33 619 31. Mendis S, Al Bashir I, Dissanayake L, Varghese C, Fadhil I, Marhe E, et al. Gaps in capacity in  
34 620 primary care in low-resource settings for implementation of essential noncommunicable disease  
35 621 interventions. *International Journal of Hypertension*. 2012;2012:584041.
- 36 622 32. Musinguzi G, Bastiaens H, Wanyenze RK, Mukose A, Van Geertruyden JP, Nuwaha F. Capacity  
37 623 of Health Facilities to Manage Hypertension in Mukono and Buikwe Districts in Uganda: Challenges  
38 624 and Recommendations. *PLoS ONE [Electronic Resource]*.10(11):e0142312.
- 39 625 33. Mutale W, Bosomprah S, Shankalala P, Mweemba O, Chilengi R, Kapambwe S, et al.  
40 626 Assessing capacity and readiness to manage NCDs in primary care setting: Gaps and opportunities  
41 627 based on adapted WHO PEN tool in Zambia. *PLoS ONE [Electronic Resource]*.13(8):e0200994.
- 42 628 34. Nyarko KM, Ameme DK, Ocansey D, Commeh E, Markwei MT, Ohene SA. Capacity  
43 629 assessment of selected health care facilities for the pilot implementation of Package for Essential  
44 630 Non-communicable Diseases (PEN) intervention in Ghana. *The Pan African medical journal*.25(Suppl  
45 631 1):16.
- 46 632 35. Pakhare A, Kumar S, Goyal S, Joshi R. Assessment of primary care facilities for cardiovascular  
47 633 disease preparedness in Madhya Pradesh, India. *BMC Health Services Research*. 2015;15:408.
- 48 634 36. Peck R, Mghamba J, Vanobberghen F, Kavishe B, Rugarabamu V, Smeeth L, et al.  
49 635 Preparedness of Tanzanian health facilities for outpatient primary care of hypertension and  
50 636 diabetes: a cross-sectional survey. *The Lancet Global Health*. 2014;2(5):e285-92.
- 51 637 37. Volk RJ, Foxhall LE. Readiness of primary care clinicians to implement lung cancer screening  
52 638 programs. *Preventive Medicine Reports*. 2015;2:717-9.
- 53  
54  
55  
56  
57  
58  
59  
60



- 1  
2  
3 639 38. Biswas T, Haider MM, Das Gupta R, Uddin J. Assessing the readiness of health facilities for  
4 640 diabetes and cardiovascular services in Bangladesh: a cross-sectional survey. *BMJ*  
5 641 *Open*.8(10):e022817.  
6 642 39. National Institute of Population Research and Training. Bangladesh Health Facility Survey:  
7 643 2017. 2020.  
8 644 40. Aekplakorn W, Suriyawongpaisal P, Sirirassamee B. Assessment of capacity for  
9 645 cardiovascular disease control and prevention in Thailand: a qualitative study. *Southeast Asian*  
10 646 *Journal of Tropical Medicine & Public Health*.36(3):741-7.  
11 647 41. Kien VD, Van Minh H, Giang KB, Ng N, Nguyen V, Tuan LT, et al. Views by health professionals  
12 648 on the responsiveness of commune health stations regarding non-communicable diseases in urban  
13 649 Hanoi, Vietnam: a qualitative study. *BMC Health Serv Res*. 2018;18(1):392.  
14 650 42. Panda R, Mahapatra S, Persai D. Health system preparedness in noncommunicable diseases:  
15 651 Findings from two states Odisha and Kerala in India. *J Family Med Prim Care*. 2018;7(3):565-70.  
16 652 43. Elias MA, Pati MK, Aivalli P, Srinath B, Munegowda C, Shroff ZC, et al. Preparedness for  
17 653 delivering non-communicable disease services in primary care: access to medicines for diabetes and  
18 654 hypertension in a district in south India. *BMJ Glob Health*. 2017;2(Suppl 3):e000519.  
19 655 44. Meiqari L, Nguyen T-P-L, Essink D, Wright P, Scheele F. Strengthening human and physical  
20 656 infrastructure of primary healthcare settings to deliver hypertension care in Vietnam: a mixed-  
21 657 methods comparison of two provinces. *Health policy and planning*. 2020;35(8):918-30.  
22 658 45. Thi Thuy Nga N, Thi My Anh B, Nguyen Ngoc N, Minh Diem D, Duy Kien V, Bich Phuong T, et  
23 659 al. Capacity of Commune Health Stations in Chi Linh District, Hai Duong Province, for Prevention and  
24 660 Control of Noncommunicable Diseases. *Asia-Pacific Journal of Public Health*.29(5\_suppl):94S-101S.  
25 661 46. van Dijk-de Vries A, van Bokhoven MA, de Jong S, Metsemakers JF, Verhaak PF, van der  
26 662 Weijden T, et al. Patients' readiness to receive psychosocial care during nurse-led routine diabetes  
27 663 consultations in primary care: A mixed methods study. *International Journal of Nursing*  
28 664 *Studies*.63:58-64.  
29 665 47. Van Minh H, Do YK, Bautista MA, Tuan Anh T. Describing the primary care system capacity  
30 666 for the prevention and management of non-communicable diseases in rural Vietnam. *International*  
31 667 *Journal of Health Planning & Management*.29(2):e159-73.  
32 668 48. Bawazir AA, Al-Surimi K, Suwaidan SD, AlShehri AM, AlFarhan AI, Aboufotouh MA. Capacity  
33 669 and readiness of primary health care centers for implementation of the basic strategy for prevention  
34 670 and control of non-communicable diseases in Saudi Arabia. A case study from the Ministry of  
35 671 National Guard-Health Affairs, Riyadh, Saudi Arabia. *Saudi Medical Journal*.40(6):614-8.  
36 672 49. Sacks E, Morrow M, Story WT, Shelley KD, Shanklin D, Rahimtoola M, et al. Beyond the  
37 673 building blocks: integrating community roles into health systems frameworks to achieve health for  
38 674 all. *BMJ Glob Health*. 2018;3(Suppl 3):e001384.  
39 675 50. Allen LN. Financing national non-communicable disease responses. *Glob Health Action*.  
40 676 2017;10(1):1326687.  
41 677 51. Mendis S. The policy agenda for prevention and control of non-communicable diseases. *Br*  
42 678 *Med Bull*. 2010;96:23-43.  
43 679 52. Robinson HM, Hort K. Non-communicable diseases and health systems reform in low-and-  
44 680 middle-income countries. *Pac Health Dialog*. 2012;18(1):179-90.  
45 681 53. Fonseca VA, Kirkman MS, Darsow T, Ratner RE. The American Diabetes Association diabetes  
46 682 research perspective. *Diabetes Care*. 2012;35(6):1380-7.  
47 683 54. Lastra G, Syed S, Kurukulasuriya LR, Manrique C, Sowers JR. Type 2 diabetes mellitus and  
48 684 hypertension: an update. *Endocrinol Metab Clin North Am*. 2014;43(1):103-22.  
49 685 55. Malekzadeh A, Michels K, Wolfman C, Anand N, Sturke R. Strengthening research capacity in  
50 686 LMICs to address the global NCD burden. *Glob Health Action*. 2020;13(1):1846904.  
51 687 56. Shigayeva A, Atun R, McKee M, Coker R. Health systems, communicable diseases and  
52 688 integration. *Health Policy and Planning*. 2010;25(suppl\_1):i4-i20.  
53  
54  
55  
56  
57  
58  
59  
60

- 1  
2  
3 689 57. Nigatu T. Integration of HIV and noncommunicable diseases in health care delivery in low-  
4 690 and middle-income countries. *Preventing chronic disease*. 2012;9.  
5 691 58. Esterson Y, Carey M, Piette J, Thomas N, Hawkins M. A Systematic Review of Innovative  
6 692 Diabetes Care Models in Low-and Middle-Income Countries (LMICs). *Journal of health care for the*  
7 693 *poor and underserved*. 2014;25:72-93.  
8 694 59. Gillam S. Is the declaration of Alma Ata still relevant to primary health care? *Bmj*.  
9 695 2008;336(7643):536-8.  
10 696 60. Maciocco G. Alma Ata 30 years on. Evolution and perspectives of primary health care. *Ann*  
11 697 *lg*. 2008;20(4):389-99.  
12 698 61. Mamudu HM, Yang JS, Novotny TE. UN resolution on the prevention and control of non-  
13 699 communicable diseases: an opportunity for global action. *Global public health*. 2011;6(4):347-53.  
14 700 62. Ezzati M, Obermeyer Z, Tzoulaki I, Mayosi BM, Elliott P, Leon DA. Contributions of risk  
15 701 factors and medical care to cardiovascular mortality trends. *Nat Rev Cardiol*. 2015;12(9):508-30.  
16 702 63. Kontis V, Bennett JE, Mathers CD, Li G, Foreman K, Ezzati M. Future life expectancy in 35  
17 703 industrialised countries: projections with a Bayesian model ensemble. *Lancet*.  
18 704 2017;389(10076):1323-35.  
19 705 64. Lloyd-Sherlock PG, Ebrahim S, McKee M, Prince MJ. Institutional ageism in global health  
20 706 policy. *Bmj*. 2016;354:i4514.  
21 707 65. World Health Organization. A global review of primary health care: emerging messages:  
22 708 global report. 2003.  
23 709 66. Jeet G, Thakur JS, Prinja S, Singh M. Community health workers for non-communicable  
24 710 diseases prevention and control in developing countries: Evidence and implications. *PLoS One*.  
25 711 2017;12(7):e0180640.  
26 712 67. World Health Organization. Preventing noncommunicable diseases [Available from:  
27 713 <https://www.who.int/activities/preventing-noncommunicable-diseases>.  
28 714 68. Van Lerberghe W. The world health report 2008: primary health care: now more than ever:  
29 715 World Health Organization; 2008.

716

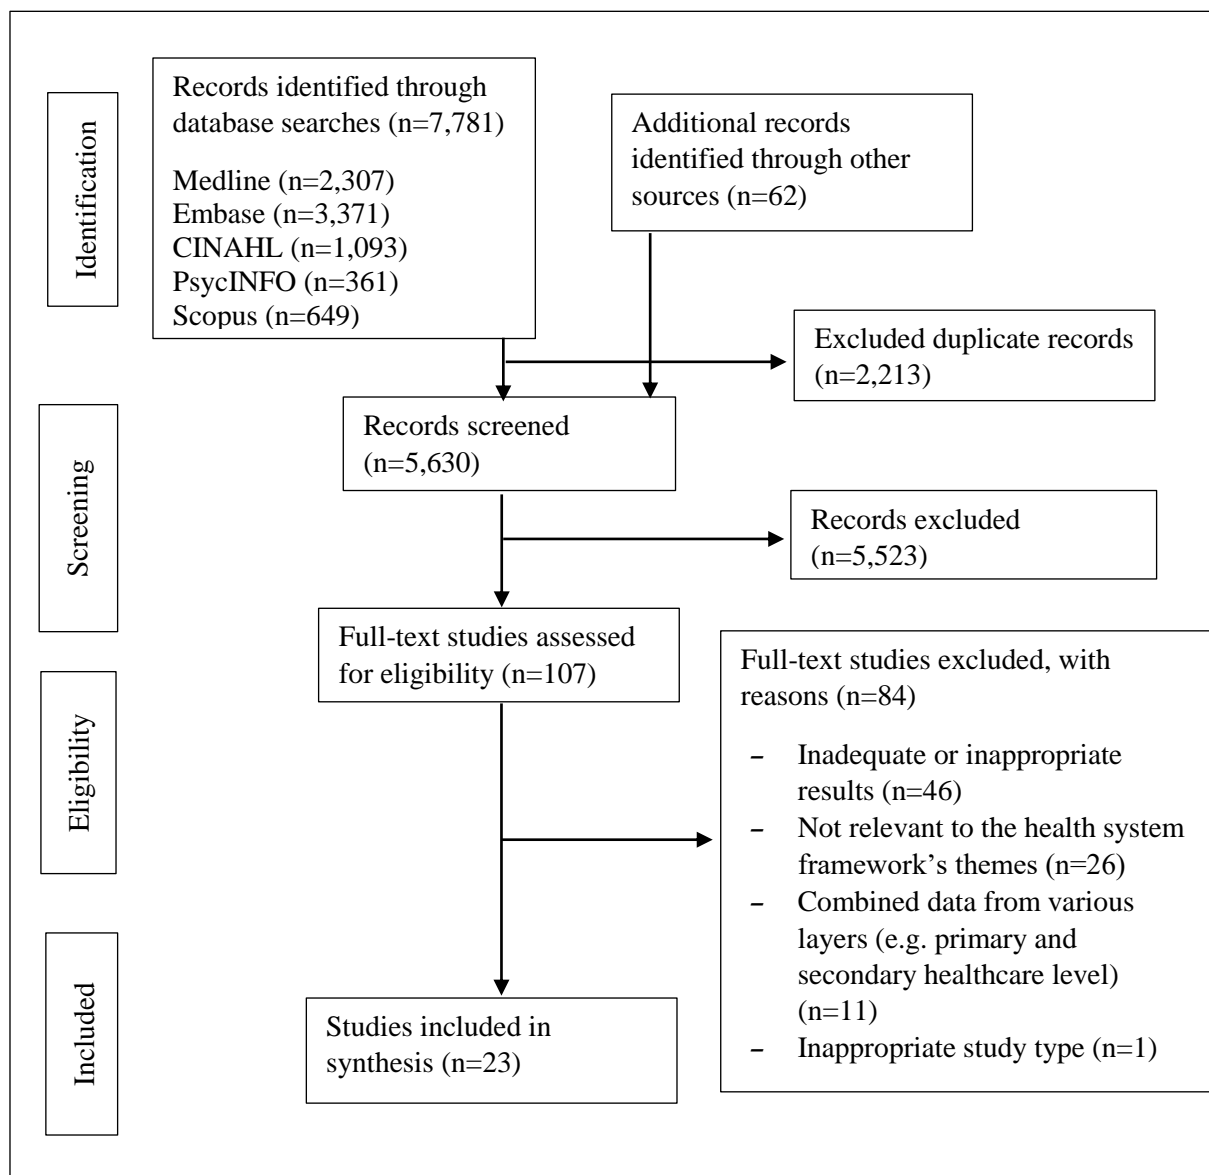

Figure 1 PRISMA flowchart for study inclusion.

1  
2  
3  
4  
5  
6  
7  
8  
9  
10  
11  
12  
13  
14  
15  
16  
17  
18  
19  
20  
21  
22  
23  
24  
25  
26  
27  
28  
29  
30  
31  
32  
33  
34  
35  
36  
37  
38  
39  
40  
41  
42  
43  
44  
45  
46  
47  
48  
49  
50  
51  
52  
53  
54  
55  
56  
57  
58  
59

a



b



c



d



## Supplementary appendix

**Table S1. Literature search strategy**

Database(s): **Ovid MEDLINE(R) and Epub Ahead of Print, In-Process, In-Data-Review & Other Non-Indexed Citations, Daily and Versions(R)** Search Strategy: 1<sup>st</sup> of January 1984 to July 30<sup>th</sup> 2021

| #  | Searches                                                                                                                                                                                                                                                                                                                                                                                        |
|----|-------------------------------------------------------------------------------------------------------------------------------------------------------------------------------------------------------------------------------------------------------------------------------------------------------------------------------------------------------------------------------------------------|
| 1  | chronic disease/ or multiple chronic conditions/ or non communicable disease/                                                                                                                                                                                                                                                                                                                   |
| 2  | (chronic disease* or chronic disorder* or chronic* sick* or chronic health condition* or chronic medical condition* or chronic* ill* or long term condition* or multimorbidit* or mult imorbidit*).mp.                                                                                                                                                                                          |
| 3  | (non-communicable disease* or non-infectious disease* or noncommunicable disease* or noninfectious disease*).mp.                                                                                                                                                                                                                                                                                |
| 4  | (cardiovascular disease* or coronary artery disease* or myocardial isch?emia or myocardial infarct* or pulmonary disease* or chronic obstructive pulmonary or chronic obstructive lung or chronic obstructive respiratory or diabetes or coronary heart disease* or neoplasm* or cancer*).mp.                                                                                                   |
| 5  | (hypertension or hypertriglycerid?emi* or hyper triglycerid?emi* or high triglyceride* or high cholesterol or hypercholesterol?emi* or hyperlipid?emia* or hyperlipidemi*).mp.                                                                                                                                                                                                                  |
| 6  | (diastolic pressure or systolic pressure or blood pressure or cardiometabolic syndrome*).mp.                                                                                                                                                                                                                                                                                                    |
| 7  | (copd or asthma or renal disease* or kidney disease*).mp.                                                                                                                                                                                                                                                                                                                                       |
| 8  | 1 or 2 or 3 or 4 or 5 or 6 or 7                                                                                                                                                                                                                                                                                                                                                                 |
| 9  | Primary Health Care/                                                                                                                                                                                                                                                                                                                                                                            |
| 10 | Delivery of Health Care/                                                                                                                                                                                                                                                                                                                                                                        |
| 11 | (primary health system or primary health service or primary healthcare system or primary health care system or primary healthcare service or primary health care service or primary medical service delivery or primary medical care service or primary care service or primary care system).mp.                                                                                                |
| 12 | (first-level healthcare or first-level health care or first-level health system* or first-level health facilit* or local health system* or local health care or local healthcare or local-level health*).mp.                                                                                                                                                                                    |
| 13 | ((primary or first-level or local) adj3 health* adj3 (clinic* or center* or centre* or setting*)).mp.                                                                                                                                                                                                                                                                                           |
| 14 | 9 or 10 or 11 or 12                                                                                                                                                                                                                                                                                                                                                                             |
| 15 | 8 and 14                                                                                                                                                                                                                                                                                                                                                                                        |
| 16 | (readiness or preparedness or capacity or quality improvement or quality of Improvement).mp.                                                                                                                                                                                                                                                                                                    |
| 17 | 15 and 16                                                                                                                                                                                                                                                                                                                                                                                       |
| 18 | ((primary care or primary health care or primary healthcare or primary health system* or primary medical service* or primary medical care or (first-level healthcare or first-level health care or first-level health system* or first-level health facilit* or local health system* or local health care or local healthcare or local-level health*)) adj5 (accessibility or availability).mp. |
| 19 | 8 and 18                                                                                                                                                                                                                                                                                                                                                                                        |
| 20 | ((primary care or primary health care or primary healthcare or primary health system* or primary medical service* or primary medical care or (first-level healthcare or first-level health care or first-level health system* or first-level health facilit* or local health system* or local health care or local healthcare or local-level health*)) adj (need* or demand*).mp.               |
| 21 | 8 and 20                                                                                                                                                                                                                                                                                                                                                                                        |
| 22 | ((primary or first-level or local) adj3 health* adj3 (clinic* or center* or centre* or setting*) adj3 (need* or demand*).mp.                                                                                                                                                                                                                                                                    |

|    |                                                                      |
|----|----------------------------------------------------------------------|
| 23 | 8 and 22                                                             |
| 24 | 17 or 19 or 21 or 23                                                 |
| 25 | limit 24 to english language                                         |
| 26 | limit 25 to (case reports or comment or editorial or letter or news) |
| 27 | 25 not 26                                                            |

### Database(s): Embase Classic+Embase

### Search Strategy:

| #  | Searches                                                                                                                                                                                                                                                                                                                                                                                                                                                                                                                                                                                                                                                                                                                                                                                                                                                                                                                                                                                                                        |
|----|---------------------------------------------------------------------------------------------------------------------------------------------------------------------------------------------------------------------------------------------------------------------------------------------------------------------------------------------------------------------------------------------------------------------------------------------------------------------------------------------------------------------------------------------------------------------------------------------------------------------------------------------------------------------------------------------------------------------------------------------------------------------------------------------------------------------------------------------------------------------------------------------------------------------------------------------------------------------------------------------------------------------------------|
| 1  | exp antineoplastic agent/ or cancer therapy/ or bone marrow purging/ or bone marrow rescue/ or exp cancer adjuvant therapy/ or exp cancer chemotherapy/ or cancer gene therapy/ or cancer hormone therapy/ or exp cancer immunotherapy/ or exp cancer radiotherapy/ or multimodality cancer therapy/ or oncolytic virotherapy/ or target cell destruction/ or immunotherapy/ or adoptive immunotherapy/ or exp chimeric antigen receptor immunotherapy/ or radioimmunotherapy/ or exp radiotherapy/ or exp bone marrow transplantation/ or exp hematopoietic stem cell transplantation/ or stem cell transplantation/ or cancer patient/ or cancer survivor/                                                                                                                                                                                                                                                                                                                                                                    |
| 2  | exp neoplasm/dt, rt [Drug Therapy, Radiotherapy]                                                                                                                                                                                                                                                                                                                                                                                                                                                                                                                                                                                                                                                                                                                                                                                                                                                                                                                                                                                |
| 3  | (anti-cancer* or anti-neoplas* or anticancer* or antineoplas* or anticancerogen* or anticarcinogen* or anti-carcinogen* or anti-tumo?r* or antitumor?r* or cancer inhibitor* or tumo?r inhibitor* or anti-leukemi* or antileukemi* or oncotherap* or antimetastatic* or anti-metastatic* or antimetastas#s or anti-metastas#s).mp.                                                                                                                                                                                                                                                                                                                                                                                                                                                                                                                                                                                                                                                                                              |
| 4  | ((cancer* or tumo?r* or neoplas* or carcinoma* or malignan* or adenocarcinoma* or sarcoma* or lymphoma* or leukemi* or blastoma* or carcinostatic or oncolog* or carcinocidal or oncocidal or oncostatic) adj3 (therap* or drug* or agent* or chemotherap* or electrochemotherap* or treat* or medication* or compound* or immunotherap* or immunological or immunomodul* or immunomodurat*)).mp.                                                                                                                                                                                                                                                                                                                                                                                                                                                                                                                                                                                                                               |
| 5  | ((adenoma* or chondrosarcoma* or osteosarcoma* or rhabdomyosarcoma* or astrocytoma* or ependymoma* or glioma* or neuroblastoma* or medulloblastoma* or oligodendroglioma* or pheochromocytoma* or retinoblastoma* or cholangiocarcinoma* or melanoma* or mesothelioma* or pheochromocytoma* or paraganglioma* or craniopharyngioma* or esthesioneuroblastoma* or myeloma*) adj (therap* or treatment* or drug* or agent* or medication* or vaccine*)).mp.                                                                                                                                                                                                                                                                                                                                                                                                                                                                                                                                                                       |
| 6  | ((cancer or tumo?r) adj (cure* or healing or remed* or vaccin* or adjuvant therap* or multichemotherap* or polychemotherap* or gene therap* or hormon* therap* or radiation or irradiation or ablation or immun* therap*)).mp.                                                                                                                                                                                                                                                                                                                                                                                                                                                                                                                                                                                                                                                                                                                                                                                                  |
| 7  | ((cancer or carcinoma or adenocarcinoma or sarcoma or lymphoma or leukemia or blastoma or adenoma or chondrosarcoma or osteosarcoma or rhabdomyosarcoma or astrocytoma or ependymoma or glioma or neuroblastoma or medulloblastoma or oligodendroglioma or pheochromocytoma or retinoblastoma or cholangiocarcinoma or melanoma* or mesothelioma or pheochromocytoma or paraganglioma or craniopharyngioma or esthesioneuroblastoma or myeloma or oncolog*) adj (patient* or survivor* or sufferer*)).mp.                                                                                                                                                                                                                                                                                                                                                                                                                                                                                                                       |
| 8  | (alkylating adj (agent* or chemical* or compound* or cytostatic*)).mp.                                                                                                                                                                                                                                                                                                                                                                                                                                                                                                                                                                                                                                                                                                                                                                                                                                                                                                                                                          |
| 9  | ((((angiogenesis or neovascularisation or tumo?r vascularisation) adj inhibitor*) or ((angiostatic or anti-angiogenesis or antiangiogenesis or anti-angiogenic or antiangiogenic or antimutagenic) adj (agent* or drug*))).mp.                                                                                                                                                                                                                                                                                                                                                                                                                                                                                                                                                                                                                                                                                                                                                                                                  |
| 10 | (abecomotide or abemaciclib or abexinostat or abieslactone or abivertinib or abrotanone or aburatubolactam A or aburatubolactam C or abyssinone V or acalabrutinib or acalisib or aceglatone or acodazole or adaphostin or adarotene or adavosertib or aderbasib or afamitresgene autoleucel or afatinib or afuresertib or Agaricus blazei extract or agatolimod or agerafenib or aglatimagene or besadenovec or albicanyl acetate or aldesleukin or alectinib or alicdamotide or alisertib or adozelesin or alkanesulfonic acid or amsacrine or amsacrine derivative or asulacrine isethionate or busulfan or dimethylbusulfan or mesylic acid or mesylic acid derivative or mesylic acid ethyl ester or mesylic acid methyl ester or mesylmesylic acid 2 chloroethyl ester or methylene dimesylate or treosulfan or ametantrone or anaxirone or aziridine derivative or apaziquone or azimexon or aziridine or aziridinylbenzoquinone or azirine derivative or carboquinone or ciamexon or diaziquone or dipin or pumitepa or |

1  
2  
3  
4  
5  
6  
7  
8  
9  
10  
11  
12  
13  
14  
15  
16  
17  
18  
19  
20  
21  
22  
23  
24  
25  
26  
27  
28  
29  
30  
31  
32  
33  
34  
35  
36  
37  
38  
39  
40  
41  
42  
43  
44  
45  
46  
47  
48  
49  
50  
51  
52  
53  
54  
55  
56  
57  
58  
59  
60

|           |                                                                                                                                                                                                                                                                                                                                                                                                                                                                                                                                                                                                                                                                                                                                                                                                                                                                                                                                                                                                                                                                                                                                                                                                                                                                                                                                                                                                                                                                                                                                                                                                                                                                                                                                                                                                                                                                                                                                                                                                                                                                                                                                                                                                                                                                                                                                                                                                                                                                                                                                    |
|-----------|------------------------------------------------------------------------------------------------------------------------------------------------------------------------------------------------------------------------------------------------------------------------------------------------------------------------------------------------------------------------------------------------------------------------------------------------------------------------------------------------------------------------------------------------------------------------------------------------------------------------------------------------------------------------------------------------------------------------------------------------------------------------------------------------------------------------------------------------------------------------------------------------------------------------------------------------------------------------------------------------------------------------------------------------------------------------------------------------------------------------------------------------------------------------------------------------------------------------------------------------------------------------------------------------------------------------------------------------------------------------------------------------------------------------------------------------------------------------------------------------------------------------------------------------------------------------------------------------------------------------------------------------------------------------------------------------------------------------------------------------------------------------------------------------------------------------------------------------------------------------------------------------------------------------------------------------------------------------------------------------------------------------------------------------------------------------------------------------------------------------------------------------------------------------------------------------------------------------------------------------------------------------------------------------------------------------------------------------------------------------------------------------------------------------------------------------------------------------------------------------------------------------------------|
|           | <p>thiotepa or tretamine or tretazicar or triaziquone or uredopa or banoxantrone or bisantrene or bizelesin or brostallicin or carboplatin or carzelesin or chlormethine derivative or acridine mustard or aldophosphamide or alestramustine or ambamustine or amustaline or aniline mustard or bendamustine or benzoquinone mustard or bestrabucil or canfosfamide or chlorambucil or chlormethine or chlornaphazine or cloturin or cortifen or cyclophosphamide or cydrin or dichlorodiethylamine or dopan or estramustine or evofosfamide or galamustine or glufosfamide or gonadorelin or ifosfamide or laromustine or mafosfamide or mafosfamide cyclohexylamine or mafosfamide lysine or mannomustine or melphalan or mepacrine mustard or palifosfamide or peptichemio or perfosfamide or phenesterin or phosphoramidate mustard or sarcolysin or sufosfamide or tallimustine or tinostamustine or trofosfamide or uramustine or xylamine or cisplatin or cyclodisone or dacarbazine or dianhydrogalactitol or etoglucid or imidacrine or irofulven or ledoxantrone or losoxantrone or mitoxantrone or nitrosourea derivative or bofumustine or butylnitrosourea or carmustine or chloroethylnitrosourea or chloroethylnitrosourea derivative or cystemustine or ecomustine or elmustine or estradiol 17 or ethylnitrosourea or fotemustine or lomustine or methylnitrosourea or nimustine or nitrosourea or prednimustine or ranimustine or semustine or spirazidine or spiromustine or streptozocin or taumustine or nortopixantrone or oxanthrazole or pentamethylmelamine or pixantrone or procarbazine or teloxantrone or temozolomide or topixantrone or alobresib or alpelisib or alpha sarcin or altemicidin or alteminostat or altiratinib or altretamine or ambazone or amcasertib or amidox or aminothiadiazole or amonafide or amphethinile or amphidinolide A or amphidinolide B or amphidinolide D or amsilarotene or amuvatinib).mp.</p>                                                                                                                                                                                                                                                                                                                                                                                                                                                                                                                                                                     |
| <p>11</p> | <p>(acrizanib or aflibercept or aganirsen or alofanib or anecortave or anginex or angiostatic protein or angiostatin or angiozyme or atiprimod or avadomide or axitinib or beloranib or bermekimab or bevasiranib or brivanib or cabozantinib or canstatin or caplostatin or carlumab or carotuximab or cediranib or cenupatide or cetuximab or cilengitide or combretastatin A1 phosphate or conbercept or conendostatin or crenolanib or crizotinib or dalantercept or depudecin or dovitinib or endostatin or endothelial monocyte activating polypeptide II or fexapotide or foretinib or foslinanib or fruquintinib or fumagillol chloroacetylcarbamate or glesatinib or infigratinib or lapatinib plus pazopanib or lenalidomide or lenvatinib or linifanib or lucitanib or maspin or monoclonal antibody DC101 or monoclonal antibody imc 1c11 or motesanib or muparfostat or dicarboxamide or navicixizumab ornintedanib or ofranergene obadenovec or oglufanide or orantinib or paclitaxel or pazopanib or pegaptanib or pegdinetanib or pegpleranib or pixatimod or pomalidomide or ranibizumab or recombinant endostatin or regorafenib or relzomostat or rinucumab or risuteganib or roneparstat or semaxanib or "siRNA 027" or sonepcizumab or sorafenib or squalamine or sunitinib or tanomastat or tasquinimod or tesevatinib or thalidomide or thrombospondin 1 or thrombospondin 2 or tigapotide or tiomolibdate choline or tirbanibulin or tivozanib or toceranib or trabedersen or trebananib or tumstatin or vandetanib or varisacumab or vascular endothelial growth inhibitor or vascular endothelial cell growth inhibitor or vascular endothelial growth factor antagonist vascular endothelial growth factor inhibitor or VEGF inhibitor or vasculotropin inhibitor or abicipar pegol or bevacizumab or brolocizumab or catequentinib or dilpacimab or faricimab or olinvacimab or pamufetinib or ramucirumab or rivoceranib or sintilimab or vulinacimab vatalanib or volociximab or vorolanib or metastasis inhibitor or carcinostatic alkaloid or acronine or afeletecan or atiratecan or becatecarin or belotecan or camptothecin or topotecan or cephalotaxine or coralyne or cositecan or cyclopamine or datelliptium chloride or deacetylvinblastine or demecolcine or diazepinomicin or diflomotecan or ellipravin or ellipticine or elliptinium or elomotecan or etirinotecan pegol or etoposide or exatecan or exatecan alideximer or fagaronine or firtecan or gimatecan or govitecan).mp.</p> |
| <p>12</p> | <p>(harringtonine or homoharringtonine or indicine n oxide or indirubin or irinotecan or lorvotuzumab mertansine or lurbinedectin or maytansine or mitopodozide or mureletecan or namitecan or napavin or narciclasine or nitidine or olivacine or patidegib or pazelliptine or pegamotecan or retelliptine or rubitecan or senecionine or sinococuline or solamargine or swainsonine or tenifatecan or teniposide or thalicarpine or trabectedin or trewiasine or trimethylcolchicinic acid or vinblastine or vincristine or vindesine or vinflunine or vinfosiltine or vinleucinol or vinleurosine or vinorelbine tartrate or vintafolide or vintriptol or vinzolidine or withanolide or carcinostatic antibiotic or 21 aminoepothilone B or 3 deazaaristeromycin or actinobolin or 7 aminodactinomycin or actinomycin derivative or adozelesin or alanosine or alvespimycin or ankinomycin or anthracycline antibiotic agent* or 11 deoxydaunorubicin or 2 fluoroidarubicin or 2 pyrrolinodoxorubicin or 4 demethoxy 11 deoxydaunomycinone or 4 demethoxydaunomycinone or 4 demethoxydoxorubicin or 4 iodoesorubicin or 5 iminodaunorubicin or 9 deacetyl 9 methylidarubicin or 9 deoxydoxorubicin or aclacinomycin or aclacinomycin B or aclarubicin or adriamycinone or aklavinone or aldorubicin or amrubicin or annamycin or anthracycline or anthracyclinone derivative or barminomycin I or berubicin or camsirubicin or carubicin or cinerubin A or</p>                                                                                                                                                                                                                                                                                                                                                                                                                                                                                                                                                                                                                                                                                                                                                                                                                                                                                                                                                                                                                                                                  |

|    |                                                                                                                                                                                                                                                                                                                                                                                                                                                                                                                                                                                                                                                                                                                                                                                                                                                                                                                                                                                                                                                                                                                                                                                                                                                                                                                                                                                                                                                                                                                                                                                                                                                                                                                                                                                                                                                                                                                                                                                                                                                                                                                                                                                                                                                                                                                                                                                                                                                                                                                                                                                                                                                                                                                                                                                                                                                                                                                                                                                                                                                                                                              |
|----|--------------------------------------------------------------------------------------------------------------------------------------------------------------------------------------------------------------------------------------------------------------------------------------------------------------------------------------------------------------------------------------------------------------------------------------------------------------------------------------------------------------------------------------------------------------------------------------------------------------------------------------------------------------------------------------------------------------------------------------------------------------------------------------------------------------------------------------------------------------------------------------------------------------------------------------------------------------------------------------------------------------------------------------------------------------------------------------------------------------------------------------------------------------------------------------------------------------------------------------------------------------------------------------------------------------------------------------------------------------------------------------------------------------------------------------------------------------------------------------------------------------------------------------------------------------------------------------------------------------------------------------------------------------------------------------------------------------------------------------------------------------------------------------------------------------------------------------------------------------------------------------------------------------------------------------------------------------------------------------------------------------------------------------------------------------------------------------------------------------------------------------------------------------------------------------------------------------------------------------------------------------------------------------------------------------------------------------------------------------------------------------------------------------------------------------------------------------------------------------------------------------------------------------------------------------------------------------------------------------------------------------------------------------------------------------------------------------------------------------------------------------------------------------------------------------------------------------------------------------------------------------------------------------------------------------------------------------------------------------------------------------------------------------------------------------------------------------------------------------|
|    | <p>cinerubin B or daunomycinone or daunorubicin or monoclonal antibody conjugate or daunorubicinol or decilrubicin or detorubicin or ditrisarubicin B or doxorubicin or doxorubicinol or epirubicin or epirubicinol or epsilon rhodomycinone or esorubicin or galarubicin or gancotamab or idarubicin or idarubicinol or ladirubicin or leurubicin or n benzylidoxorubicin 14 valerate or n trifluoroacetyldoxorubicin or n trifluoroacetyldoxorubicin 14 hydrogen adipate or nemorubicin or obelmycin or oxaunomycin or pirarubicin or pyrromycinone or rhodomycin A or rodorubicin or ruboxyl or sabarubicin or valrubicin or viriplanin A or zoptarelin doxorubicin or zorubicin or anthramycin or arasangivamycin or asperlin or auromomycin or azaserine or bactobolin or bizelesin or blasticidin S or bleomycin or bleomycinic acid or liblomycin or pepleomycin or cactinomycin or cadeguomycin or calicheamicin or gemtuzumab or inotuzumab ozogamicin or calphostin or caplostatin or carzelesin or chartreusin or chlorozotocin or chromomycin or chrysomycin or colabomycin A or congocidine or cordycepin or dactinomycin or dehydrodidemnin B or dehydroxysparsomycin or didemnin or distamycin A derivative or duocarmycin or duocarmazine or duocarmycin SA or dynemicin A or echinomycin or echinosporin or elsamicin A or epothilone or esperamicin or formycin or fostriecin or fredericamycin A or fumagillin or fumagillo).mp.</p>                                                                                                                                                                                                                                                                                                                                                                                                                                                                                                                                                                                                                                                                                                                                                                                                                                                                                                                                                                                                                                                                                                                                                                                                                                                                                                                                                                                                                                                                                                                                                                                                                                                      |
| 13 | <p>(geldanamycin or gilvocarcin V or glidobactin or granaticin or hadacidin or herbimycin or himastatin or illudin or irofulven or ixabepilone or kapurimycin or kedarcidin or leinamycin or lidamycin or luzopeptin or macbecin I or macromomycin or marcellomycin or menogaril or mithramycin or 7 n acetylmitomycin C or mitomycin or porfiromycin or musettamycin or mycophenolic acid or n bromoacetyldistamycin A or neothramycin or neplanocin A or nogalamycin or olivomycin or oxanosine or ozogamicin or pactamycin or pibenzimol or pibrozelesin or pirazofurin or prodigiosin or puromycin or pyrindamycin A or pyrindamycin B or quinocarcin or rachelmycin or rebeccamycin or resorthiomycin or retaspimycin or reumycin or rodaplutin or romidepsin or rubomycin or rufocromomycin or saframycin or sagopilone or sangivamycin or sapurimycin or sarkomycin or showdomycin or sibiromycin or sparsomycin or spergualin orspicamycin or spongistatin 1 or spongistatin 2 or streptonigrin derivative or tallysomycin or tanespimycin or tetracenomycin C or thiocoraline or thrazarine or tomaymcyin or tubercidin or tuftsin or vicanistatin or yunnanmycin or zinostatin or buthionine sulfoximine or folic acid antagonist or folic acid antimetabolite or pteroylglutamic acid antimetabolite or 10 deazaaminopterin or 7 hydroxymethotrexate or aminopterin or arfolitixorin or bromebric acid or dichloromethotrexate or edatrexate or gamma fluoromethotrexate or homofolic acid or lometrexol or metesind or methotrexate or metodiclorofen or nolatrexed or pelitrexol or pemetrexed or piritrexim or plevitrexed or pralatrexate or raltitrexed or talotrexin or triazinate or trimetrexate or oxythiamine or purine antagonist or 4 carbamoylimidazolium 5 olate or 6 methylthioinosine or 6 n benzyladenosine or 8 azaguanine or azaguanosine or azathioprine or cladribine or clofarabine or cloturin or deoxythioguanosine or dezaguanine or fludarabine or guanine 7 oxide or guanine arabinoside or mercaptopurine or nelarabine or pentostatin or selenazofurin or sulfenosine or sulfinosine or sulfonosine or thioguanosine or tiazofurin or tioguanine or pyrimidine antagonist or 3 deazauridine or 3 ethynylcytidine or 5 chlorodeoxycytidine or 5 hydroxymethyldeoxyuridine or 5 aminothymidine or 5 deoxy 5 fluorocytidine or 6 azacytidine or ancitabine or azacitidine or azauracil or azauridine or brequinar or bromodeoxycytidine or capecitabine or carmofur or cloxuridine or cytarabine or cytarazid or decitabine or dihydrofluorouracil or doxifluridine or elacytarabine or emitetur or enocitabine orfazarabine or fiacitabine or floxuridine or flucytosine deoxyriboside or fluorouracil or fluorouridine or fosfluridine tidoxil or fosomecitabine palabenamide or fosifloxuridine nafalbenamide or galocitabine or gemcitabine or gimeracil plus oteracil potassium plus tegafur or guadecitabine or orzel or ropidoxuridine or sapacitabine or tegafur or tezacitabine or tipiracil plus trifluridine or troxacitabine or uracil arabinoside).mp.</p> |
| 14 | <p>(4 hydroxytoremifene or abiraterone or acetylsalicylic acid plus aluminum hydroxide plus ascorbic acid plus prednisone or acetylsalicylic acid plus caffeine plus phenacetin plus prednisolone or acetylsalicylic acid plus calcium carbonate plus methylprednisolone or acetylsalicylic acid plus calcium carbonate plus prednisolone or acetylsalicylic acid plus methylprednisolone or acetylsalicylic acid plus prednisolone or acolbifene or afimoxifene or aluminum hydroxide plus ascorbic acid plus prednisone plus salicylamide or aluminum hydroxide plus calcium ascorbate plus calcium carbonate plus pantothenate calcium plus potassium salicylate plus prednisone or aluminum hydroxide plus magnesium trisilicate plus pantothenate calcium plus prednisolone or aluminum hydroxide plus magnesium trisilicate plus prednisone or amcenestrant or angiopeptin or apalutamide or aromatase inhibitor or estrogen synthetase inhibitor or oestrogen synthetase inhibitor or steroid aromatase inhibitor or abyssinone II or aminogluthethimide or anastrozole or atamestane or exemestane or fadrozole or finrozole or formestane or leflutrozole or letrozole or liarozole or minamestane or plomestane or pyridoglutethimide or testolactone or vorozole or arzoxifene or ascorbic acid plus chlorpheniramine maleate plus prednisone or ascorbic acid plus chlorpheniramine plus prednisone or avorelin or bestrabucil or bicalutamide or buserelin or calcium</p>                                                                                                                                                                                                                                                                                                                                                                                                                                                                                                                                                                                                                                                                                                                                                                                                                                                                                                                                                                                                                                                                                                                                                                                                                                                                                                                                                                                                                                                                                                                                                                                                                       |



|           |                                                                                                                                                                                                                                                                                                                                                                                                                                                                                                                                                                                                                                                                                                                                                                                                                                                                                                                                                                                                                                                                                                                                                                                                                                                                                                                                                                                                                                                                                                                                                                                                                                                                                                                                                                                                                                                                                                                                                                                                                                                                                                                                                                                                                                                                                                                                                                                                                                                                                                                                                                                                                                                                                                                                                                                                                                                                                                                                                                                                                                                                                                                                                                                                                                                                                                                                                                         |
|-----------|-------------------------------------------------------------------------------------------------------------------------------------------------------------------------------------------------------------------------------------------------------------------------------------------------------------------------------------------------------------------------------------------------------------------------------------------------------------------------------------------------------------------------------------------------------------------------------------------------------------------------------------------------------------------------------------------------------------------------------------------------------------------------------------------------------------------------------------------------------------------------------------------------------------------------------------------------------------------------------------------------------------------------------------------------------------------------------------------------------------------------------------------------------------------------------------------------------------------------------------------------------------------------------------------------------------------------------------------------------------------------------------------------------------------------------------------------------------------------------------------------------------------------------------------------------------------------------------------------------------------------------------------------------------------------------------------------------------------------------------------------------------------------------------------------------------------------------------------------------------------------------------------------------------------------------------------------------------------------------------------------------------------------------------------------------------------------------------------------------------------------------------------------------------------------------------------------------------------------------------------------------------------------------------------------------------------------------------------------------------------------------------------------------------------------------------------------------------------------------------------------------------------------------------------------------------------------------------------------------------------------------------------------------------------------------------------------------------------------------------------------------------------------------------------------------------------------------------------------------------------------------------------------------------------------------------------------------------------------------------------------------------------------------------------------------------------------------------------------------------------------------------------------------------------------------------------------------------------------------------------------------------------------------------------------------------------------------------------------------------------------|
|           | <p>phosphate dibasic plus cyanocobalamin plus ethinylestradiol plus methylphenidate plus methyltestosterone plus nicotinamide plus pyridoxine plus riboflavin plus thiamine or calusterone or carisoprodol plus prednisolone or chloramphenicol plus prednisolone or chlorbutol plus phenylephrine plus prednisolone acetate or chlorotrianisene or chlorpheniramine gluconate plus prednisolone acetate or chlorzoxazone plus paracetamol plus prednisolone or conjugated estrogen or cyproterone or deslorelin or diethylstilbestrol derivative or dienestrol or diethylstilbestrol or fosfestrol or hexestrol or methestrol or dimethylstilbestrol or droloxifene or drostanolone or ectylurea plus ethoxzolamide plus medroxyprogesterone acetate or endoxifen or enzalutamide or ephedrine plus phenobarbital plus prednisone plus theophylline or estradiol undecylate or ethinylestradiol or fluoxymesterone or flutamide or fulvestrant or galeterone or gentamicin plus prednisolone acetate or gestonorone or goserelin or gramicidin plus neomycin plus phenylephrine plus prednisolone acetate or hydroxyflutamide or hydroxyprogesterone or hydroxytamoxifen or hydroxyzine plus prednisolone or idoxifene or leuprorelin or medroxyprogesterone or megestrol or melengestrol or mephenesin plus methylphenobarbital plus prednisone or mepitiostane).mp.</p>                                                                                                                                                                                                                                                                                                                                                                                                                                                                                                                                                                                                                                                                                                                                                                                                                                                                                                                                                                                                                                                                                                                                                                                                                                                                                                                                                                                                                                                                                                                                                                                                                                                                                                                                                                                                                                                                                                                                                                                              |
| <p>15</p> | <p>(methoxyphenamine plus methylprednisolone or methylprednisolone or methyltestosterone or miproxifene or nafarelin or nandrolone or neomycin plus phenylephrine plus phenylpropanolamine plus prednisolone sodium phosphate or neomycin plus phenylephrine plus prednisolone or neomycin plus phenylephrine plus prednisolone acetate or neomycin plus polymyxin B plus prednisolone acetate or neomycin plus prednisolone or neomycin plus prednisolone acetate or neomycin plus prednisolone sodium phosphate or nilutamide or nortamoxifen or ormeloxifene or orteronel or ospemifene or ozarelix or panomifene or phenylephrine plus prednisolone or pipendoxifene or polyestradiol or prednisolone or prednisone or raloxifene or seviteronel or sivifene or tamoxifen or tesmilifene or testololactone or testosterone propionate or toremifene or trioxifene or triptorelin or zanoterone or zindoxifene or zoptarelin doxorubicin or antineoplastic metal complex or amminebisbutyratodichloro cyclohexylamine platinum or bleomycin cobalt or bleomycin copper or budotitane or capecitabine plus oxaliplatin or carboplatin or carboxyethylgermanium sesquioxide or cisplatin or clivatuzumab tetraxetan or cycloplatam or doxorubicin copper or doxorubicin iron or enloplatin or epratuzumab tetraxetan yttrium y 90 or eptaplatin or imifoplatin or iproplatin or labetuzumab tetraxetan yttrium y 90 or lilotomab satetraxetan lutetium lu 177 or lintuzumab satetraxetan actinium ac 225 or lobaplatin or malopen or miboplatin or miriplatin or nedaplatin or oxaliplatin or oxoplatin or pasireotide tetraxetan gallium ga 68 or picoplatin or platinum ammine cyclohexylamine dichloride or platinum ethylenediamine dichloride or satoreotide tetraxetan or satraplatin or sebriplatin or spirogermanium or spiroplatin or tacatuzumab tetraxetan yttrium y 90 or tetrachloroplatinate potassium or tetrachloroplatinum fast black or tetraplatin or tetulomab tetraxetan lutetium lu 177 or titanocene or triplatin tetranitrate or vipivotide tetraxetan or zeniplatin or antroquinonol or apicidin or apitolisib or aplysianin E or apoptin or apoptosis inducing factor or 2 hydroxymethyl 2 methoxymethyl 3 quinuclidinone or arsenic trioxide or clezutoclast or daratumumab or genistein or isotretinoin or lisavanbulin or moxetumomab pasudotox or otenaproxesul or rimiducid or tapotoclast or apricoxib or arenastatin A or asciminib or aspacytarabine or asparaginase or asunercept or atueveciclib or audencel or avanbulin or avapritinib or avi 4126 or aviscumine or axicabtagene ciloleucel or bafetinib or balamapimod or barasertib or bardoxolone or batabulin or batracylin or beclanorsen or beclin 1 or belapectin or belinostat or belizatinib or belvarafenib or belzupacap sarotalocan or belzutifan or bemcentinib or bempegaldesleukin or benfluron or bersanlimab or berzosertib or beta elemene or beta lapachone or bexarotene or bifikafusp alfa or bimiralisib or binimetinib or birabresib or biricodar or birinapant or bisnafide or bistratene or bomedemstat or borofalan b 10 or bortezomib or bosutinib or briciclib or brigatinib or brilanestrant or bropirimine or bryostatin or bullatacin or bullatacinone or buparlisib or cabazitaxel or calaspargase pegol or camelliin B or camidanlumab).mp.</p> |
| <p>16</p> | <p>(adagloxad simolenin or adegramotide or algenpantucel L or autogene cevumeran or axalimogene filolisbac or baloramotide or baltaleucel T or belagenpumatucl L or biropepimut S or bizalimogene ralaplasmid or cadalimogene ixalentevec or dasiprotimut T or dorgenmeltucel L or eltrapuldencel T or falimarev or galinpepimut S or imm 101 or inalimarev or lapuleucel T or lovaxin b or maveropepimut S or mavilimogene ralaplasmid or mesmulogene ancovacivec or mitumprotimut T or modified vaccinia virus Ankara 5T4 vaccine or nelatimotide or nelipepimut S or olvimulogene nanivacirepvec or ombipepimut S or onamelatucl L or opolimogene capmilisbac or pemlimogene merolisbac or ranagengliotucel T or rasdegafusp alfa or rindopepimut or rocapuldencel T or rovaleucel or ruxotemitide or seviprotimut L or sipuleucel T or tecemotide or tergenpumatucl L or tertomotide or theratope or tipapkinogene sovacivec or tisagenlecleucel T or vadacabtagene leraleucel or vesigenurtucel L or viagenpumatucl L or vitespen or zastumotide or canertinib or capivasertib or capmatinib or caracemide or carbetimer or carfilzomib or carlecortemcel L or carmethizole or ceclazepide or cedazuridine or cemadotin or cenersen or cenisertib or ceralasertib or cerdulatinib or cergutuzumab amunaleukin or ceritinib or cevipabulin or</p>                                                                                                                                                                                                                                                                                                                                                                                                                                                                                                                                                                                                                                                                                                                                                                                                                                                                                                                                                                                                                                                                                                                                                                                                                                                                                                                                                                                                                                                                                                                                                                                                                                                                                                                                                                                                                                                                                                                                                                                                                   |

1  
2  
3  
4  
5  
6  
7  
8  
9  
10  
11  
12  
13  
14  
15  
16  
17  
18  
19  
20  
21  
22  
23  
24  
25  
26  
27  
28  
29  
30  
31  
32  
33  
34  
35  
36  
37  
38  
39  
40  
41  
42  
43  
44  
45  
46  
47  
48  
49  
50  
51  
52  
53  
54  
55  
56  
57  
58  
59  
60

|    |                                                                                                                                                                                                                                                                                                                                                                                                                                                                                                                                                                                                                                                                                                                                                                                                                                                                                                                                                                                                                                                                                                                                                                                                                                                                                                                                                                                                                                                                                                                                                                                                                                                                                                                                                                                                                                                                                                                                                                                                                                                                                                                                                                                                                                                                                                                                                                                                                                                                                                                                                                                                                                                    |
|----|----------------------------------------------------------------------------------------------------------------------------------------------------------------------------------------------------------------------------------------------------------------------------------------------------------------------------------------------------------------------------------------------------------------------------------------------------------------------------------------------------------------------------------------------------------------------------------------------------------------------------------------------------------------------------------------------------------------------------------------------------------------------------------------------------------------------------------------------------------------------------------------------------------------------------------------------------------------------------------------------------------------------------------------------------------------------------------------------------------------------------------------------------------------------------------------------------------------------------------------------------------------------------------------------------------------------------------------------------------------------------------------------------------------------------------------------------------------------------------------------------------------------------------------------------------------------------------------------------------------------------------------------------------------------------------------------------------------------------------------------------------------------------------------------------------------------------------------------------------------------------------------------------------------------------------------------------------------------------------------------------------------------------------------------------------------------------------------------------------------------------------------------------------------------------------------------------------------------------------------------------------------------------------------------------------------------------------------------------------------------------------------------------------------------------------------------------------------------------------------------------------------------------------------------------------------------------------------------------------------------------------------------------|
|    | <p>chloroquine or ciferadenant or ciltacabtagene autoleucel or cintirorgon or citarinostat or clervonafusp alfa or clofazimine or cobimetinib or cobomarsen or colloidal gold or combretastatin or conteltinib or contusugene ladenovec or copanlisib or corynebacterium parvum extract or crenigacestat or crisnatol or cryptophycin or curcumin or custirsen or cyclophosphamide plus doxorubicin plus taxane or cysteine ethyl ester methylcarbamate or cytostatic agent or cytotoxic agent or emtansine or mafodotin or mertansine or ravtansine or soravtansine or tafasitamab or dabrafenib or dacinostat or dacomitinib or dactolisib or damistimagene matitucel or danusertib or danvatirsen or daporinad or darinaparsin or darleukin or darolutamide or dasatinib or davamotecan pegadexamer or decernotinib or defactinib or degarelix or dehydroxymethylepoxyquinomicin or delanzomib or delimotecan or delolimogene mupadenorepvec or demethoxycurcumin or demplatin pegraglumer or denileukin diftitox or derazantinib).mp.</p>                                                                                                                                                                                                                                                                                                                                                                                                                                                                                                                                                                                                                                                                                                                                                                                                                                                                                                                                                                                                                                                                                                                                                                                                                                                                                                                                                                                                                                                                                                                                                                                                      |
| 17 | <p>(azintuzumab or balstilimab or belantamab or bemarituzumab or benufutamab or bexmarilimab or bintrafusp alfa or bivatumab or blinatumomab or blontuvetmab or brentuximab vedotin or brontictuzumab or budigalimab or camrelizumab or cantuzumab or catumaxomab or cemiplimab or cergutuzumab or cetrelimab or cetuximab or cevostamab or cibisatamab or cinrebafusp alfa or cixutumumab orclivatuzumab tetraxetan or cobolimab or codrituzumab or cofetuzumab or coltuximab or conatumumab or cosibelimab or cudarolimab or cusatumumab or dacetuzumab or dalotuzumab or daratumumab or datopotamab or demcizumab or demupitamab or denintuzumab or denosumab or depatuzumab or derlotuximab biotin i 131 or detumomab or dilpacimab or dinutuximab or disitamab or dostarlimab or drozitumab or duligotuzumab or durvalumab or dusigitumab or duvortuxizumab or ecomeximab or edrecolomab or efizonerimod alfa or elgemtumab or elotuzumab or emactuzumab or emibetuzumab or enapotamab or enavatuzumab or encelimab or enfortumab or enoblituzumab or enoticumab or ensituximab or envafolimab or epcoritamab or epitumomab or epratuzumab or ertumaxomab or etaracizumab or ezablenimab or farletuzumab or feladilimab or felzartamab or fianlimab or ficlatuzumab or figitumumab or flanvotumab or flotetuzumab or fresolimumab or futuximab or galiximab or gancotamab or ganitumab or gatipotuzumab or gatrallimab or giloralimab or gilvetmab or girentuximab or glembatumumab or glofitamab or hyaluronidase plus rituximab or hyaluronidase plus trastuzumab or ibritumomab tiuxetan or icrucumab or ieramilimab or ifabotuzumab or iladatuzumab or imalumab or imgatuzumab or immunoliposome or immunotoxin or anatumomab mafenatox or cintredekin besudotox or citatumab bogatox or moxetumomab pasudotox or nacolomab tafenatox or naptumomab estafenatox or taplitumomab paptox or telimomab aritox or indatuximab or indusatumab or inebilizumab or inetumumab or ipilimumab or iratumumab or isatuximab or istiratamab or ivuxolimab or labetuzumab or lacnotuzumab or lacutamab or ladiratuzumab or laprituximab or lenzilumab or lexatumumab or lifastuzumab or lilotomab or lintuzumab or lirilumab or lodapolimab or loncastuximab or lorukafusp alfa or lorvotuzumab or losatuxizumab or lucatumumab or lumiliximab or lumretuzumab or lupartumab or magrolimab or manelimab or mapatumumab or margetuximab or matuzumab or mavezelimab or mezagitamab or milatuzumab or minretumomab or miptenalimab or mirvetuximab or mirzotamab or mitumomab or modakafusp alfa or modotuximab or mogamulizumab or monalizumab).mp.</p> |
| 18 | <p>(deruxtecan or devimistat or dexniguldipine or dexverapamil or dezapelisib or diacetyldianhydrogalactitol or diaspirin crosslinked haemoglobin or didemethoxycurcumin or diglycoaldehyde or dihydroambazone or dilanubicel or dinaciclib or dinaline or discodermolide or disufenton sodium or ditercalinium or docetaxel or dociparstat or dofequidar or dolastatin or domatinostat or dubermatinib or dulanermin or duvelisib or ebifuramin or edelfosine or edicotinib or edotecarin or edotreotide ga 68 or edotreotide lu 177 or edotreotide y 90 or efaprinermin alfa or efatutazone or efgivanermin alfa or efineptakin alfa or eflornithine or eftozanermin alfa or elacestrant or elacridar or elafibranor or elagolix or elesclomol or eleutherobin or elinafide or elisidepsin or eltanexor or empesertib or enasidenib or encequidar or encorafenib or enistimgene setitucel or ensartinib or entasobulin or entinostat or entospletinib or entrectinib or enzastaurin or epertinib or epipodophyllotoxin or erbulozole or erdafitinib or eribulin or erlotinib or erucin or ethazolastone or etidalgide or everolimus or exicorilant or factor AF2 or fadraciclib or falnidamol or fedratinib or felezonexor or fenebrutinib or fenretinide or ferritin antibody i 131 or fetindomide or fibromun or filanesib or filgotinib or fimepinostat or fisogatinib or flavopiridol or flumatinib or fluorocyclopentenylcytosine or forodesine or fosciclopirox or fosquidone or fumitremorgin C or futibatinib or gallium nitrate or galunisertib or gandotinib or gataparsen or gedatolisib or gefitinib or geiparvarin or gendicine or gene expression modulator 231 or ghilanten or giliteritinib or girolline or givinostat or glasdegib or glucopyranosyl lipid A or glycoprotein P inhibitor or golnerminogene pradenovec or golvatinib or goniofufurone or granulocyte macrophage colony stimulating factor vaccine or grifolan or guanazole or gusacitinib or halichondrin B or heat shock protein 27 inhibitor or apatorsen or heat shock protein 90 inhibitor or alvespimycin or celastrol or gambogic acid or gamendazole or ganetespiib or geldanamycin or</p>                                                                                                                                                                                                                                                                                                                                                                                                                                                                |

|    |                                                                                                                                                                                                                                                                                                                                                                                                                                                                                                                                                                                                                                                                                                                                                                                                                                                                                                                                                                                                                                                                                                                                                                                                                                                                                                                                                                                                                                                                                                                                                                                                                                                                                                                                                                                                                                                                                                                                                                                                                                                                                                                                                                                                                                                                                                                                                                                                                                                                                                                                                                                                                                                                                                                                                          |
|----|----------------------------------------------------------------------------------------------------------------------------------------------------------------------------------------------------------------------------------------------------------------------------------------------------------------------------------------------------------------------------------------------------------------------------------------------------------------------------------------------------------------------------------------------------------------------------------------------------------------------------------------------------------------------------------------------------------------------------------------------------------------------------------------------------------------------------------------------------------------------------------------------------------------------------------------------------------------------------------------------------------------------------------------------------------------------------------------------------------------------------------------------------------------------------------------------------------------------------------------------------------------------------------------------------------------------------------------------------------------------------------------------------------------------------------------------------------------------------------------------------------------------------------------------------------------------------------------------------------------------------------------------------------------------------------------------------------------------------------------------------------------------------------------------------------------------------------------------------------------------------------------------------------------------------------------------------------------------------------------------------------------------------------------------------------------------------------------------------------------------------------------------------------------------------------------------------------------------------------------------------------------------------------------------------------------------------------------------------------------------------------------------------------------------------------------------------------------------------------------------------------------------------------------------------------------------------------------------------------------------------------------------------------------------------------------------------------------------------------------------------------|
|    | luminespib or onalespib or pimitespib or retaspimycin or tanespimycin or hepsulfam or HER dimerization inhibitor or hexamethylenebisacetamide or hydroxymethylpentamethylmelamine or hydroxyurea or hypericin or hypothemycin or iadademstat or ibrutinib or icotinib or idasanutlin or idecabtagene vicleucel or idelalisib or idetrexed or idronoxil or ilixadencel or ilmofosine or ilorasertib or imaradenant or imatinib or imetelstat or imlatoclox or abagovomab or abituzumab or actimab a or adebrelimab or adecatumumab or alacizumab pegol or alemtuzumab or alsevalimab or amatuximab or amivantamab or andecaliximab or anetumab or apolizumab or aprutumab or aprutumab ixadotin or ascrinvacumab or astegolimab or atezolizumab or avdoralimab or avelumab or axatilimab).mp.                                                                                                                                                                                                                                                                                                                                                                                                                                                                                                                                                                                                                                                                                                                                                                                                                                                                                                                                                                                                                                                                                                                                                                                                                                                                                                                                                                                                                                                                                                                                                                                                                                                                                                                                                                                                                                                                                                                                                             |
| 19 | (monoclonal antibody J591 or mosunetuzumab or murlentamab or nadunolimab or naratuximab or narnatumab or naxitamab or necitumumab or nesvacumab or nimotuzumab or nivolumab or nurulimab or obinutuzumab or ocaratuzumab or odronextamab or ofatumumab or olaratumab or oleclumab or olinvacimab or omburtamab or onartuzumab or ontuxizumab or onvatilimab or oportuzumab monatox or opucolimab or oregovomab or otlertuzumab or pacmilimab or panitumumab or parsatuzumab or pasotuxizumab or patritumab or pembrolizumab or pemtumomab or pepinemab or pertuzumab or petosemtamab or pidilizumab or pimurutamab or pinatuzumab vedotin or plamotamab or polatuzumab vedotin or praluzatamab or pritumumab or prolgolimab or quavonlimab or racotumomab or radretumab or ragifilimab or ramucirumab or rasdegafusp alfa or relatlimab or retifanlimab or revdofilimab or rilotumumab or ripertamab or rituximab or robatumumab or rolinsatamab or rosmantuzumab or rosopatamab or rovalpituzumab or rovalpituzumab tesirine or sabatolimab or sacituzumab or samalizumab or samrotamab or sasanlimab or selicrelumab or serclutamab or seribantumab or serplulimab or sibrotuzumab or siltuximab or simlukafusp alfa or simtuzumab or sintilimab or sirtratumab or sofituzumab or solitomab or sontuzumab or spartalizumab or sugemalimab or tabalumab or tabituximab or tacatuzumab or tetraxetan yttrium y 90 or tacatuzumab y 90 or tafasitamab or talacotuzumab or talquetamab or tamrintamab or tamtuvetmab or tarextumab or tavolimab or tebotelimab or teclistamab or telisotuzumab or tenatumomab or tepoditamab or teprotumumab or tetulomab tetraxetan lutetium lu 177 or ticilimumab or tidutamab or tigatuzumab or tilogotamab or tilvestamab or timigutuzumab or tinurilimab or tiragolumab or tislelizumab or tisotumab or tomuzotuximab or toralizumab or toripalimab or tositumomab or tovetumab or trastuzumab or ublituximab or ulocuplumab or upifitamab or urabrelimab or urelumab or utomilumab or vadastuximab or vandortuzumab vedotin or vantictumab or vanucizumab or varlilumab or veltuzumab or vesencumab or vibecotamab or vibostolimab or vofatamab or vonlerolizumab or vopratelimab or vorsetuzumab or vulinacimab or xentuzumab or zalifrelimab or zalutumumab or zanidatamab or zanolimumab or zolbetuximab or zuberitamab).mp.                                                                                                                                                                                                                                                                                                                                                                                      |
| 20 | (inavolisib or inbakicept or incyclinide or indibulin or indisulam or indoximod or ingenol disoxate or ingenol mebutate or inodiftagene vixteplasmid or interferon regulatory factor 2 or intiquinatine or intoplicine or ipafricept or ipatasertib or irosustat or isoswinholide A or ispinesib or itacitinib or itraconazole or ivaltinostat or ivosidenib or ixazomib or kahalalide F or krestin or laetrile or laniquidar or lapachol or lapatinib or lapretolimod or larifan or larotaxel or larotrectinib or laulimalide or lefitolimod or lerociclib or lestaurtinib or letetresgene autoleucel or lexidronam samarium sm 153 or lifileucel or lifirafenib or linperlisib or linrodostat or lisocabtagene maraleucel or litenimod or litronesib or lonafarnib or lonidamine or lorlatinib or ltvax or lurtotecan or maltose tetrapalmitate or masitinib or mavelertinib or mavorixafor or melacine or merbarone or merestinib or methanol extraction residue or metirosine or mevociclib or midostaurin or mifamurtide or milademetan or milataxel or milciclib or miltefosine or mipetresgene autoleucel or mipsagargin or miralimogene ensolisbac or miransertib or mirdametinib or mirostipen or mitazalimab or mitindomide or mitobronitol or mitoflaxone or mitoguazone or mitolactol or mitonafide or mitoquidone or mitotane or mitozolomide or mivavotinib or mivebresib or mivobulin or mobocertinib or mocemestrocil or mocetinostat or molibresib or momelotinib or monastrol or mosedipimod or motixafortide or motolimod or mubritinib or mucocin or murizatoclox or mycalamide or myeloablative agent or nabiximols or nadofaragene firadenovec or namodenoson or nanatinostat or napabucasin or naquotinib or nastorazepide or navitoclox or navoximod or nazartinib or necuparanib or nemiralisib or neratinib or netazepide or nevanimibe or nilotinib or niraparib or nirogacestat or nitracrine or nitrocaphane or noscapine or numidargistat or nutlin or obafistat or obatoclox or oblimersen or oblongifolin C or oblongixanthone A or obovatal or obtusilactone A or oclacitinib or olafertinib or olaparib or olaptosed pegol or olcorolimus or olitresgene autoleucel or olmutinib or olutasidenib or olverembatinib or omidubicel or omipalisib or omtriptolide or onatasertib or oncolytic virus or oncolytic adenovirus or enadenotucirev or lontucirev or tasadenoturev or oncolytic herpes virus or canerpaturev or seprehvir or talimogene laherparepvec or teserpaturev or oncolytic paramyxovirus or oncolytic parvovirus or oncolytic reovirus or pelareorep or pexastimogene devacirepvec or onfekafusp alfa or ontorpaccept or onvansertib or opaganib or opigolix or oprozomib or oracin or orelabrutinib or |

|    |                                                                                                                                                                                                                                                                                                                                                                                                                                                                                                                                                                                                                                                                                                                                                                                                                                                                                                                                                                                                                                                                                                                                                                                                                                                                                                                                                                                                                                                                                                                                                                                                                                                                                                                                                                                                                                                                                                                                                                                                                                                                                                                                                                                                                                                                                                                                                                                                                                                                                                                                                                                                                                                                                                                                                                                                                                                                                                                                                                                                                                                                                                                           |
|----|---------------------------------------------------------------------------------------------------------------------------------------------------------------------------------------------------------------------------------------------------------------------------------------------------------------------------------------------------------------------------------------------------------------------------------------------------------------------------------------------------------------------------------------------------------------------------------------------------------------------------------------------------------------------------------------------------------------------------------------------------------------------------------------------------------------------------------------------------------------------------------------------------------------------------------------------------------------------------------------------------------------------------------------------------------------------------------------------------------------------------------------------------------------------------------------------------------------------------------------------------------------------------------------------------------------------------------------------------------------------------------------------------------------------------------------------------------------------------------------------------------------------------------------------------------------------------------------------------------------------------------------------------------------------------------------------------------------------------------------------------------------------------------------------------------------------------------------------------------------------------------------------------------------------------------------------------------------------------------------------------------------------------------------------------------------------------------------------------------------------------------------------------------------------------------------------------------------------------------------------------------------------------------------------------------------------------------------------------------------------------------------------------------------------------------------------------------------------------------------------------------------------------------------------------------------------------------------------------------------------------------------------------------------------------------------------------------------------------------------------------------------------------------------------------------------------------------------------------------------------------------------------------------------------------------------------------------------------------------------------------------------------------------------------------------------------------------------------------------------------------|
|    | <p>ortataxel or orvacabtagene autoleucel or osimertinib or oxamflatin or oxodotreotide lu 177 or paclitaxel ceribate or paclitaxel derivative or paclitaxel poliglumex or paclitaxel tocosol or paclitaxel trevatide or pacritinib or palbociclib or palmerolide A or pamiparib or panaxytriol or panduratin A or panobinostat or panulisib or parsacliclib or pasireotide or paxalisib or pegargiminase or pegcantratinib or pegcrisantaspase or pegilodecakin or pegvorhyaluronidase alfa or pelcitolax or pelidotin or pelitinib or pemigatinib or penclomedine or peposertib or peretinoin).mp.</p>                                                                                                                                                                                                                                                                                                                                                                                                                                                                                                                                                                                                                                                                                                                                                                                                                                                                                                                                                                                                                                                                                                                                                                                                                                                                                                                                                                                                                                                                                                                                                                                                                                                                                                                                                                                                                                                                                                                                                                                                                                                                                                                                                                                                                                                                                                                                                                                                                                                                                                                   |
| 21 | <p>(perifosine or pevonedistat or pexidartinib or phenethyl isothiocyanate or phomopsin A or phorboxazole or phyllanthocin or phyllanthoside or picibanil or pictilisib or pilaralisib or pimasetib or pinometostat or pipobroman or pivaloyloxymethyl butyrate or plocabulin or plusonermin or podophyllotoxin or polyerga or ponatinib or poztotinib or pracinostat or pralsetinib or prexasertib or prexigebersen or prospidium or ptilocaulin or pyran copolymer or pyrazine diazohydroxide or quarfloxin or quisinostat or quizartinib or rabacfosadine or rabusertib or radiosensitizing agent or radio-sensitizing agent or bromodeoxycytidine or broxuridine or chloroaluminum phthalocyanine or cloxuridine or crocetin ordecloramidate or doranidazole or efaproxiral or etanidazole or etiopurpurin or fimaporfin or gadolinium texaphyrin or gilvocarcin V or hematoporphyrin derivative or isometronidazole or lemuteporfin or lutetium texaphyrin or merocyanine or misonidazole or motexafin or napavin or nimorazole or nocodazole or normisonidazole or padeliporfin or padoporfin or photofrin I or photofrin II or photosan III or phthalocyanine or pimonidazole or porfimer or redaporfin or senazole or talaporfin or temoporfin or tetrachloroplatinum fast black or tetraphenylporphyrin or tetrasulfophthalocyanine or tirapazamine or tretazicar or troquidazole or verteporfin or radium chloride ra 223 or radotinib or ralimetinib or ranpirnase or rapamycin or ravoxertinib or razoxane or rebastinib or recombinant asparaginase or recombinant interleukin 21 or denenicokin or recombinant methionine gamma lyase or recombinant tumor necrosis factor related apoptosis inducing ligand or refametinib or remetinostat or repotrectinib or resminostat or rezivertinib or rhizoxin or rhodamine 6G or ribociclib or ribonucleotide reductase R2 specific phosphorothioate oligonucleotide or ricolinostat or ridaforolimus or rigosertib or rilimogene galvacirepvec or rilimogene glafolivec or ripretinib or riviciclib or rivogenlecleucel or robaveron or roblitinib or rocakinogene sifuplasmid or rociletinib or roniciclib or roridin A or rosabulin or rosomidnar or rucaparib or ruxolitinib or salinosporamide A or salirasib or samotolisib or samuraciclib or sapanisertib or sapitinib or saracatinib or sarcodictyin A or sarcophytol A or sarcophytol B or sardomozide or satoreotide trizoxetan or savolitinib or Sclerotinia sclerotiorum extract or seclidemstat or selectikine or selinexor or selitrectinib or selpercatinib or selumetinib or seocalcitol or sepantronium bromide or serabelisib or serdemetan or serpentine or shikonin derivative or silmitasertib or simotaxel or simurosertib or siremadlin or sitimagene ceradenovec or sitravatinib or sobuzoxane or solcoderm or sonermin or sonidegib or sonolisib or sparfosic acid or spebrutinib or spirobromine or squamocin or ssioriside or stapuldencel T or starch microsphere or sulfatinib or sulforaphane or sulindac sulfone or sulofenur or suramin or swinholide A or swinholide B).mp.</p> |
| 22 | <p>(tacedinaline or tafluposide or tagraxofusp or talabostat or talactoferrin or taladegib or talazoparib or talirine or taltobulin or tamibarotene or taminadenant or tandutinib or tanshinone IIA or tanurmotide or tariquidar or tarloxotinib or taseslisib or tasidotin or tasisulam or tasonermin or tavokinogene telseplasmid or tazemetostat or tebentafusp or tebocabtagene autoleucel or tecogalan or tefinostat or tegavivint or teglarinad chloride or telaglenastat or teleukin or telomestatin or telotristat or telratolimod or temarotene or temsirolimus or tenalisib or tengonermin or tepotinib or teprasiran or terameprocol or teroxirone or tesetaxel or tetramethylmelamine or travil or thioglucose or tian xian wan or tigilanol tiglactate or tilomisole or tilsotolimod or timcodar or timonacic derivative or tipifarnib or tirabrutinib or tivantinib or tomivosertib or topsalysin or tosedostat or tozasertib or trametinib or transferrin alditox or trichlormethine or trichosanthin or trichostatin A or triciribine or triciribine phosphate or trilaciclib or trimelamol or tubacin or tubulozole or tucatinib or tucidinostat or tucotuzumab celmoleukin or tumor suppressor protein or inhibitor of growth protein 1 or ubiquitin carboxyl terminal hydrolase CYLD or tuvateixib or tylophorine or ulicyclamide or ulipristal or ulithiacyclamide or ulixertinib or umbralisib or upamostat or uproleselan or uprosertib or uzansertib or vaccinia oncolysate or vactosertib or valecobulin or valemestostat or valspodar or varlitinib or vascular targeting agent or anginex or baviximab or crolibulin or denibulin or lexibulin or n acetylcolchicol phosphate or ofranergene obadenovec or ombrabulin or plinabulin or soblidotin or vadimezan or vecabrutinib or vedotin or velimogene aliplasmid or veliparib or vemurafenib or venetoclax or verdinexor or verrucarin A or verubulin or vesatolimod or virus oncolysate or vismodegib or vistusertib or vocimagene amiretorepvec or volasertib or vorasidenib or vorinostat or voruciclib or vosaroxin or vosilasarm or voxalisib or withaferin A or WW domain containing oxidoreductase or xanthone 4 acetic acid or xevinapant or xiaochaihu tang or xiliertinib or zafiride or zandelisib or zanubrutinib or</p>                                                                                                                                                                                                                                                                                                                                                                                                                                                                                                                                                                                                                                                                                                                                                                                                          |

|    |                                                                                                                                                                                                                                                                                                                                                                                                                                                                                                                                                                                                                                                                                                                                                                                                                                                                                                                                                                                                                                                                                                                                                                                                                                                                                                                                                                                                                                                                                                                                                                                                                                                                                                                                                                                                                                                                                                                                                                                                        |
|----|--------------------------------------------------------------------------------------------------------------------------------------------------------------------------------------------------------------------------------------------------------------------------------------------------------------------------------------------------------------------------------------------------------------------------------------------------------------------------------------------------------------------------------------------------------------------------------------------------------------------------------------------------------------------------------------------------------------------------------------------------------------------------------------------------------------------------------------------------------------------------------------------------------------------------------------------------------------------------------------------------------------------------------------------------------------------------------------------------------------------------------------------------------------------------------------------------------------------------------------------------------------------------------------------------------------------------------------------------------------------------------------------------------------------------------------------------------------------------------------------------------------------------------------------------------------------------------------------------------------------------------------------------------------------------------------------------------------------------------------------------------------------------------------------------------------------------------------------------------------------------------------------------------------------------------------------------------------------------------------------------------|
|    | zenocutuzumab or zerumbone or zibotentan or zilascorb or zoledronic acid or zoligratinib or zorifertinib or zosuquidar or zotatifin or zotiraciclib).mp.                                                                                                                                                                                                                                                                                                                                                                                                                                                                                                                                                                                                                                                                                                                                                                                                                                                                                                                                                                                                                                                                                                                                                                                                                                                                                                                                                                                                                                                                                                                                                                                                                                                                                                                                                                                                                                               |
| 23 | (protein tyrosine kinase inhibitor or tyrosine kinase inhibitor or tyrosine protein kinase inhibitor or anaplastic lymphoma kinase inhibitor or bruton tyrosine kinase inhibitor or adaphostin or alofanib or alpha cyanothiocaffaic acid amide or altiratinib or alvespimycin or amivantamab or amuvatinib or alectinib or brigatinib or ceritinib or crizotinib or ensartinib or entrectinib or lorlatinib or repotrectinib or asciminib or avapritinib or axitinib or bafetinib or belizatinib or bemcentinib or bosutinib or brivanib or brivanib alaninate or acalabrutinib or branebrutinib or dasatinib or elsubrutinib or evobrutinib or ibrutinib or orelabrutinib or poseltinib or remibrutinib or rilzabrutinib or spebrutinib or tolebrutinib or vecabrutinib or zanubrutinib or cabozantinib or capmatinib or catequentinib or cediranib or cerdulatinib or cevidoplenib or conteltinib or crenolanib or damnacanthol or decernotinib or defactinib or derazantinib or dovitinib or dubermatinib or edicotinib or elafibranor or emodin or epidermal growth factor receptor kinase inhibitor or erbstatin or focal adhesion kinase inhibitor or Janus kinase inhibitor or baricitinib or brepocitinib or delgocitinib or fedratinib or fosifidancitinib or gusacitinib or ifidancitinib or ilginatinib or itacitinib or izencitinib or abrocitinib or filgotinib or lorpucitinib or momelotinib or ruxolitinib or tofacitinib or upadacitinib or lavendustin A or lazertinib or linsitinib or lorecivivint or mitogen activated protein kinase kinase inhibitor or peficitinib or pexmetinib or protein kinase Syk inhibitor or fostamatinib or lanraplenib or piceatannol or radicicol or recifercept or ritlecitinib or seralutinib or solcitinib or suppressor of cytokine signaling 1 or telatinib or tilvestamab or tyrphostin).mp.                                                                                                                                                  |
| 24 | (abscopal effect or bone marrow purging or bone marrow rescue or chemoradiotherap* or chemoradiation or antibody directed enzyme prodrug therap* or chemoembolization or graft versus tumo?r effect or graft versus leuk?emia effect or graft versus lymphoma effect or oncolytic viral therap* or oncolytic virus therap* or target cell destruction or biologic* response modifier therap* or BRM therap* or chimeric antigen receptor immunotherap* or chimeric antigen receptor natural killer cell immunotherap* or chimeric antigen receptor T-cell immunotherap* or CAR immontherap* or CAR T cell therap* or CAR T cell immunotherap* or CAR T therap* or CAR NK cell immunotherap* or CAR NK cell therap* or chimeric antigen receptor T cells or immune checkpoint inhibitor* or immune checkpoint blockade* or radioimmunotherap* or immunoradiotherap* or radiotherap* or bioradiant therap* or hemibody irradiation or irradiation therap* or irradiation treatment* or radiation therap* or radiation treatment* or radio therap* or radiotreatment or beam therap* or blood radiation or brachytherap* or interstitial radiation or radioisotope therap* or radium therap* or electron therap* or gamma irradiation or gamma knife radiosurgery or body radiation or photon beam therap* or proton beam therap* or radioimmunotherap* or stereotactic radiosurgery or teleradiotherap* or bone marrow transplant* or bone marrow cell transfer or bone marrow graft* or bone marrow transfusion* or h?ematopo?etic stem cell* or HSC therap* or HSC transplant* or stem cell transplant* or stem cell based therap* or stem cell therap* or allogeneic stem cell* or autologous stem cell* or peripheral blood stem cell* or allogene?ic HSCT or allogene?ic HSCTs or auto-HSCT or auto-HSCTs or autologous HSCT or autologous HSCTs or tumo?r killing activit* or tumo?r killing effect* or tumo?r killing action* or log cell kill or metastatic* inhibit* or metastas* inhibit*).mp. |
| 25 | 1 or 2 or 3 or 4 or 5 or 6 or 7 or 8 or 9 or 10 or 11 or 12 or 13 or 14 or 15 or 16 or 17 or 18 or 19 or 20 or 21 or 22 or 23 or 24                                                                                                                                                                                                                                                                                                                                                                                                                                                                                                                                                                                                                                                                                                                                                                                                                                                                                                                                                                                                                                                                                                                                                                                                                                                                                                                                                                                                                                                                                                                                                                                                                                                                                                                                                                                                                                                                    |
| 26 | blood vessel parameters/ or arterial stiffness/ or arterial wall thickness/ or artery diameter/ or augmentation index/ or blood vessel diameter/ or carotid-femoral pulse wave velocity/ or endothelial dysfunction/ or artery compliance/ or blood vessel compliance/ or vascular remodeling/ or artery blood flow/ or pulse wave/ or blood vessel function/ or blood vessel reactivity/ or vascular resistance/ or vasoconstriction/ or vasodilatation/ or vascular endothelium/ or artery endothelium/ or artery dilatation/ or blood flow velocity/ or blood vessel capacitance/                                                                                                                                                                                                                                                                                                                                                                                                                                                                                                                                                                                                                                                                                                                                                                                                                                                                                                                                                                                                                                                                                                                                                                                                                                                                                                                                                                                                                   |
| 27 | (tunica intima/ or endothelium, vascular/ or tunica media/ or muscle, smooth, vascular/ or Endothelial Cells/) and (cellular senescence/ or telomere shortening/ or Aging/)                                                                                                                                                                                                                                                                                                                                                                                                                                                                                                                                                                                                                                                                                                                                                                                                                                                                                                                                                                                                                                                                                                                                                                                                                                                                                                                                                                                                                                                                                                                                                                                                                                                                                                                                                                                                                            |
| 28 | arteriosclerosis/ or arteriolosclerosis/ or artery intima proliferation/                                                                                                                                                                                                                                                                                                                                                                                                                                                                                                                                                                                                                                                                                                                                                                                                                                                                                                                                                                                                                                                                                                                                                                                                                                                                                                                                                                                                                                                                                                                                                                                                                                                                                                                                                                                                                                                                                                                               |
| 29 | (endothelial function or endothelial vascular function).mp.                                                                                                                                                                                                                                                                                                                                                                                                                                                                                                                                                                                                                                                                                                                                                                                                                                                                                                                                                                                                                                                                                                                                                                                                                                                                                                                                                                                                                                                                                                                                                                                                                                                                                                                                                                                                                                                                                                                                            |
| 30 | ((vascular* or vasculature or endotheli* or vessel*) adj4 (ag?ing or aged or stiff* or dysfunction* or impair* or deficit* or defect* or change* or alteration* or remode?ling or dilat* or degenerat* or thick* or elasticit* or elastance or distens*)).mp.                                                                                                                                                                                                                                                                                                                                                                                                                                                                                                                                                                                                                                                                                                                                                                                                                                                                                                                                                                                                                                                                                                                                                                                                                                                                                                                                                                                                                                                                                                                                                                                                                                                                                                                                          |
| 31 | ((vascular* or vasculature or endotheli* or blood vessel*) adj (inflammation or senescen* or cell senescence or damage or dyshomeostasis or measurement* or compliance or calcification or reactivity)).mp.                                                                                                                                                                                                                                                                                                                                                                                                                                                                                                                                                                                                                                                                                                                                                                                                                                                                                                                                                                                                                                                                                                                                                                                                                                                                                                                                                                                                                                                                                                                                                                                                                                                                                                                                                                                            |

|    |                                                                                                                                                                                                                                                                                                                                  |
|----|----------------------------------------------------------------------------------------------------------------------------------------------------------------------------------------------------------------------------------------------------------------------------------------------------------------------------------|
| 32 | ((artery or arteries or arteria* or aorta* or aortic*) adj4 (ag?ing or stiff* or thick* or compliance or distens* or wave reflection or reflection index or elasticit* or elastance or defect* or change* or impair* or diameter* or dilat* or measurement* or dysfunction* or alteration* or remode?ling or calcification)).mp. |
| 33 | ((Intima* media* or intimamedia* or tunica intima or tunica media) adj3 thick*).mp.                                                                                                                                                                                                                                              |
| 34 | (pressure wave transmission or pressure wave reflection or pulse pressure or pulse wave velocity or pulse wave analys#s or pulse wave amplitude or arterial pulsatility or flow mediated dilation or blood flow velocit* or arter* flow velocit*).mp.                                                                            |
| 35 | (aortic blood pressure* or aortic pressure* or aortic pulse pressure* or aortic tension* or central aortic blood pressure* or central aortic pressure*).mp.                                                                                                                                                                      |
| 36 | (central BP or arterial BP or aortic BP or (central SBP or arterial SBP or aortic SBP) or (central PP or arterial PP or aortic PP)).mp.                                                                                                                                                                                          |
| 37 | (aortic blood pulse wave* or aortic pulse wave* or aortic tension* or arterial blood pulse wave* or arterial pulse wave* or arterial tension* or central aortic blood pulse wave* or central aortic pulse wave* or carotid to femoral pulse wave* or pulse wave*).mp.                                                            |
| 38 | (augmentation adj (index* or indice*)).mp.                                                                                                                                                                                                                                                                                       |
| 39 | ((augmentation or amplification) adj6 (pressure* or pulse* or wave* or aortic or central)).mp.                                                                                                                                                                                                                                   |
| 40 | 26 or 27 or 28 or 29 or 30 or 31 or 32 or 33 or 34 or 35 or 36 or 37 or 38 or 39                                                                                                                                                                                                                                                 |
| 41 | 25 and 40                                                                                                                                                                                                                                                                                                                        |
| 42 | clinical trial/ or randomized controlled trial/ or randomization/ or single blind procedure/ or double blind procedure/ or crossover procedure/ or placebo/ or prospective study/                                                                                                                                                |
| 43 | (randomi?ed controlled or RCT or randomly allocated or allocated randomly or random allocation or (allocated adj2 random) or (single adj1 blind*) or (double adj1 blind*) or ((treble or triple) adj1 blind*) or placebo*).mp.                                                                                                   |
| 44 | ((cross-sectional or prevalence or disease frequency) adj (analys#s or study or studies or survey)).mp.                                                                                                                                                                                                                          |
| 45 | ((cohort or incidence) adj (analys#s or study or studies or survey)).mp.                                                                                                                                                                                                                                                         |
| 46 | ((follow-up or followup or longitudinal or prospective or retrospective) adj (study or studies)).mp.                                                                                                                                                                                                                             |
| 47 | 42 or 43 or 44 or 45 or 46                                                                                                                                                                                                                                                                                                       |
| 48 | 41 and 47                                                                                                                                                                                                                                                                                                                        |
| 49 | (exp animal/ or exp invertebrate/ or animal.hw. or nonhuman/) not exp human/                                                                                                                                                                                                                                                     |
| 50 | 48 not 49                                                                                                                                                                                                                                                                                                                        |
| 51 | limit 50 to english language                                                                                                                                                                                                                                                                                                     |
| 52 | limit 51 to (editorial or letter or note)                                                                                                                                                                                                                                                                                        |
| 53 | 51 not 52                                                                                                                                                                                                                                                                                                                        |
| 54 | 53 not (case report* or news or newspaper*).mp,pt.                                                                                                                                                                                                                                                                               |
| 55 | limit 54 to conference abstract                                                                                                                                                                                                                                                                                                  |
| 56 | 54 not 55                                                                                                                                                                                                                                                                                                                        |
| 57 | limit 56 to conference abstracts                                                                                                                                                                                                                                                                                                 |
| 58 | 56 not 57                                                                                                                                                                                                                                                                                                                        |

| #   | Query                                                                                                                                                                                                                                                                                                                                                                                                                                                                                                                                                                                                                                                                                                                                                                                                                                                                                                               |
|-----|---------------------------------------------------------------------------------------------------------------------------------------------------------------------------------------------------------------------------------------------------------------------------------------------------------------------------------------------------------------------------------------------------------------------------------------------------------------------------------------------------------------------------------------------------------------------------------------------------------------------------------------------------------------------------------------------------------------------------------------------------------------------------------------------------------------------------------------------------------------------------------------------------------------------|
| S15 | S11 OR S13<br>Limiters - Publication Year: 1990-2020; English Language; Exclude MEDLINE records                                                                                                                                                                                                                                                                                                                                                                                                                                                                                                                                                                                                                                                                                                                                                                                                                     |
| S14 | S11 OR S13                                                                                                                                                                                                                                                                                                                                                                                                                                                                                                                                                                                                                                                                                                                                                                                                                                                                                                          |
| S13 | S5 AND S12                                                                                                                                                                                                                                                                                                                                                                                                                                                                                                                                                                                                                                                                                                                                                                                                                                                                                                          |
| S12 | (( (primary care or primary health care or primary healthcare or primary health system* or primary medical service* or primary medical care or (first-level healthcare or first-level health care or first-level health system* or first-level health facilit* or local health system* or local health care or local healthcare or local-level health*)) N4 (accessibility or availability)) ) OR ( ((primary care or primary health care or primary healthcare or primary health system* or primary medical service* or primary medical care or (first-level healthcare or first-level health care or first-level health system* or first-level health facilit* or local health system* or local health care or local healthcare or local-level health*)) N0 (need* or demand*)) ) OR ( ((primary or first-level or local) adj3 health* adj3 (clinic* or center* or centre* or setting*)) N2 (need* or demand*)) ) |
| S11 | S9 AND S10                                                                                                                                                                                                                                                                                                                                                                                                                                                                                                                                                                                                                                                                                                                                                                                                                                                                                                          |
| S10 | (readiness or preparedness or capacity or quality improvement or quality of Improvement)                                                                                                                                                                                                                                                                                                                                                                                                                                                                                                                                                                                                                                                                                                                                                                                                                            |
| S9  | S5 AND S8                                                                                                                                                                                                                                                                                                                                                                                                                                                                                                                                                                                                                                                                                                                                                                                                                                                                                                           |
| S8  | S6 OR S7                                                                                                                                                                                                                                                                                                                                                                                                                                                                                                                                                                                                                                                                                                                                                                                                                                                                                                            |
| S7  | (( (primary health system or primary health service or primary healthcare system or primary health care system or primary healthcare service or primary health care service or primary medical service delivery or primary medical care service or primary care service or primary care system) ) OR ( (first-level healthcare or first-level health care or first-level health system* or first-level health facilit* or local health system* or local health care or local healthcare or local-level health*)) ) OR ( ((primary or first-level or local) adj3 health* adj3 (clinic* or center* or centre* or setting*)) )                                                                                                                                                                                                                                                                                         |
| S6  | (MH "Primary Health Care") OR (MH "Health Care Delivery")                                                                                                                                                                                                                                                                                                                                                                                                                                                                                                                                                                                                                                                                                                                                                                                                                                                           |
| S5  | S1 OR S2 OR S3 OR S4                                                                                                                                                                                                                                                                                                                                                                                                                                                                                                                                                                                                                                                                                                                                                                                                                                                                                                |
| S4  | (( (diastolic pressure or systolic pressure or blood pressure or cardiometabolic syndrome*) ) OR ( (copd or asthma or renal disease* or kidney disease*)) )                                                                                                                                                                                                                                                                                                                                                                                                                                                                                                                                                                                                                                                                                                                                                         |
| S3  | (( (cardiovascular disease* or coronary artery disease* or myocardial isch?emia or myocardial infarct* or pulmonary disease* or chronic obstructive pulmonary or chronic obstructive lung or chronic obstructive respiratory or diabetes or coronary heart disease* or neoplasm* or cancer*) ) OR ( (hypertension or hypertriglycerid?emi* or hyper triglycerid?emi* or high triglyceride* or high cholesterol or hypercholesterol?emi* or hyperlipid?emia* or hyperlipidemi*)) )                                                                                                                                                                                                                                                                                                                                                                                                                                   |
| S2  | (( (chronic disease* or chronic disorder* or chronic* sick* or chronic health condition* or chronic medical condition* or chronic* ill* or long term condition* or multimorbidit* or mult imorbidit*)) ) OR ( (non-communicable disease* or non-infectious disease* or noncommunicable disease* or noninfectious disease*)) )                                                                                                                                                                                                                                                                                                                                                                                                                                                                                                                                                                                       |
| S1  | (MH "Chronic Disease") OR (MH "Noncommunicable Diseases") OR (MH "Chronic Pain")                                                                                                                                                                                                                                                                                                                                                                                                                                                                                                                                                                                                                                                                                                                                                                                                                                    |

## CINAHL Search

**Database(s):** APA PsycInfo  
**Search Strategy:**

| #  | Searches                                                                                                                                                                                                                                                                                                                                                                                         | Results |
|----|--------------------------------------------------------------------------------------------------------------------------------------------------------------------------------------------------------------------------------------------------------------------------------------------------------------------------------------------------------------------------------------------------|---------|
| 1  | chronic illness/ or chronic fatigue syndrome/ or chronic pain/                                                                                                                                                                                                                                                                                                                                   | 27358   |
| 2  | (chronic disease* or chronic disorder* or chronic* sick* or chronic health condition* or chronic medical condition* or chronic* ill* or long term condition* or multimorbidit* or mult imorbidit*).mp.                                                                                                                                                                                           | 48956   |
| 3  | (non-communicable disease* or non-infectious disease* or noncommunicable disease* or noninfectious disease*).mp.                                                                                                                                                                                                                                                                                 | 1052    |
| 4  | (cardiovascular disease* or coronary artery disease* or myocardial isch?emia or myocardial infarct* or pulmonary disease* or chronic obstructive pulmonary or chronic obstructive lung or chronic obstructive respiratory or diabetes or coronary heart disease* or neoplasm* or cancer*).mp.                                                                                                    | 121105  |
| 5  | (hypertension or hypertriglycerid?emi* or hyper triglycerid?emi* or high triglyceride* or high cholesterol or hypercholesterol?emi* or hyperlipid?emia* or hyperlipidemi*).mp.                                                                                                                                                                                                                   | 20201   |
| 6  | (diastolic pressure or systolic pressure or blood pressure or cardiometabolic syndrome*).mp.                                                                                                                                                                                                                                                                                                     | 24127   |
| 7  | (copd or asthma or renal disease* or kidney disease*).mp.                                                                                                                                                                                                                                                                                                                                        | 13056   |
| 8  | 1 or 2 or 3 or 4 or 5 or 6 or 7                                                                                                                                                                                                                                                                                                                                                                  | 207978  |
| 9  | primary health care/                                                                                                                                                                                                                                                                                                                                                                             | 18474   |
| 10 | health care delivery/                                                                                                                                                                                                                                                                                                                                                                            | 20844   |
| 11 | (primary health system or primary health service or primary healthcare system or primary health care system or primary healthcare service or primary health care service or primary medical service delivery or primary medical care service or primary care service or primary care system).mp.                                                                                                 | 511     |
| 12 | (first-level healthcare or first-level health care or first-level health system* or first-level health facilit* or local health system* or local health care or local healthcare or local-level health*).mp.                                                                                                                                                                                     | 338     |
| 13 | ((primary or first-level or local) adj3 health* adj3 (clinic* or center* or centre* or setting*)).mp.                                                                                                                                                                                                                                                                                            | 2322    |
| 14 | 9 or 10 or 11 or 12                                                                                                                                                                                                                                                                                                                                                                              | 38723   |
| 15 | 8 and 14                                                                                                                                                                                                                                                                                                                                                                                         | 4987    |
| 16 | (readiness or preparedness or capacity or quality improvement or quality of Improvement).mp.                                                                                                                                                                                                                                                                                                     | 118317  |
| 17 | 15 and 16                                                                                                                                                                                                                                                                                                                                                                                        | 312     |
| 18 | ((primary care or primary health care or primary healthcare or primary health system* or primary medical service* or primary medical care or (first-level healthcare or first-level health care or first-level health system* or first-level health facilit* or local health system* or local health care or local healthcare or local-level health*)) adj5 (accessibility or availability)).mp. | 148     |
| 19 | 8 and 18                                                                                                                                                                                                                                                                                                                                                                                         | 19      |
| 20 | ((primary care or primary health care or primary healthcare or primary health system* or primary medical service* or primary medical care or (first-level healthcare or first-level health care or first-level health system* or first-level health facilit* or local health system* or local health care or local healthcare or local-level health*)) adj (need* or demand*).mp.                | 290     |
| 21 | 8 and 20                                                                                                                                                                                                                                                                                                                                                                                         | 55      |
| 22 | ((primary or first-level or local) adj3 health* adj3 (clinic* or center* or centre* or setting*) adj3 (need* or demand*)).mp.                                                                                                                                                                                                                                                                    | 17      |
| 23 | 8 and 22                                                                                                                                                                                                                                                                                                                                                                                         | 2       |
| 24 | 17 or 19 or 21 or 23                                                                                                                                                                                                                                                                                                                                                                             | 387     |



|    |                                                                                          |     |
|----|------------------------------------------------------------------------------------------|-----|
| 25 | limit 24 to english language                                                             | 380 |
| 26 | limit 25 to yr="1990 -Current"                                                           | 380 |
| 27 | limit 26 to ("column/opinion" or "comment/reply" or dissertation or editorial or letter) | 41  |
| 28 | 26 not 27                                                                                | 339 |

## Scopus

### Search Strategy:

(((((TITLE-ABS-KEY(("chronic disease\*" OR "chronic disorder\*" OR "chronic\* sick\*" OR "chronic health condition\*" OR "chronic medical condition\*" OR "chronic\* ill\*" OR "long term condition\*" OR multimorbidit\* OR "mult imorbidit\*")))) OR (TITLE-ABS-KEY(("non-communicable disease\*" OR "non-infectious disease\*" OR "noncommunicable disease\*" OR "noninfectious disease\*")))) OR (TITLE-ABS-KEY(("cardiovascular disease\*" OR "coronary artery disease\*" OR "myocardial isch?emia" OR "myocardial infarct\*" OR "pulmonary disease\*" OR "chronic obstructive pulmonary" OR "chronic obstructive lung" OR "chronic obstructive respiratory" OR diabetes OR "coronary heart disease\*" OR neoplasm\* OR cancer\*))) OR (TITLE-ABS-KEY((hypertension OR hypertriglycerid?emi\* OR "hyper triglycerid?emi\*" OR "high triglyceride\*" OR "high cholesterol" OR hypercholesterol?emi\* OR hyperlipid?emia\* OR hyperlipidemi\*))) OR (TITLE-ABS-KEY(("diastolic pressure" OR "systolic pressure" OR "blood pressure" OR "cardiometabolic syndrome\*")))) OR (TITLE-ABS-KEY((copd OR asthma OR "renal disease\*" OR "kidney disease\*")))) AND ((TITLE-ABS-KEY(("primary health system" OR "primary health service" OR "primary healthcare system" OR "primary health care system" OR "primary healthcare service" OR "primary health care service" OR "primary medical service delivery" OR "primary medical care service" OR "primary care service" OR "primary care system")))) OR (TITLE-ABS-KEY(("first-level healthcare" OR "first-level health care" OR "first-level health system\*" OR "first-level health facilit\*" OR "local health system\*" OR "local health care" OR "local healthcare" OR "local-level health\*")))) OR (TITLE-ABS-KEY((primary OR "first-level" OR local) W/2 health\* W/2 (clinic\* OR center\* OR centre\* OR setting\*)))) AND (TITLE-ABS-KEY((readiness OR preparedness OR capacity OR "quality improvement" OR "quality of Improvement")))) OR (((TITLE-ABS-KEY(("chronic disease\*" OR "chronic disorder\*" OR "chronic\* sick\*" OR "chronic health condition\*" OR "chronic medical condition\*" OR "chronic\* ill\*" OR "long term condition\*" OR multimorbidit\* OR "mult imorbidit\*")))) OR (TITLE-ABS-KEY(("non-communicable disease\*" OR "non-infectious disease\*" OR "noncommunicable disease\*" OR "noninfectious disease\*")))) OR (TITLE-ABS-KEY(("cardiovascular disease\*" OR "coronary artery disease\*" OR "myocardial isch?emia" OR "myocardial infarct\*" OR "pulmonary disease\*" OR "chronic obstructive pulmonary" OR "chronic obstructive lung" OR "chronic obstructive respiratory" OR diabetes OR "coronary heart disease\*" OR neoplasm\* OR cancer\*))) OR (TITLE-ABS-KEY((hypertension OR hypertriglycerid?emi\* OR "hyper triglycerid?emi\*" OR "high triglyceride\*" OR "high cholesterol" OR hypercholesterol?emi\* OR hyperlipid?emia\* OR hyperlipidemi\*))) OR (TITLE-ABS-KEY(("diastolic pressure" OR "systolic pressure" OR "blood pressure" OR "cardiometabolic syndrome\*")))) OR (TITLE-ABS-KEY((copd OR asthma OR "renal disease\*" OR "kidney disease\*")))) AND (TITLE-ABS-KEY((( "primary care" OR "primary health care" OR "primary healthcare" OR "primary health system\*" OR "primary medical service\*" OR "primary medical care" OR "first-level healthcare" OR "first-level health care" OR "first-level health system\*" OR "first-level health facilit\*" OR "local health system\*" OR "local health care" OR "local healthcare" OR "local-level

health\*") W/4 ( accessibility OR availability )))) OR ((( TITLE-ABS-KEY ( ("chronic  
 disease\*" OR "chronic disorder\*" OR "chronic\* sick\*" OR "chronic health  
 condition\*" OR "chronic medical condition\*" OR "chronic\* ill\*" OR "long term  
 condition\*" OR multimorbidit\* OR "mult imorbidit\*")) OR ( TITLE-ABS-KEY ( ("non-  
 communicable disease\*" OR "non-infectious disease\*" OR "noncommunicable  
 disease\*" OR "noninfectious disease\*")) OR ( TITLE-ABS-KEY ( ("cardiovascular  
 disease\*" OR "coronary artery disease\*" OR "myocardial isch?emia" OR "myocardial  
 infarct\*" OR "pulmonary disease\*" OR "chronic obstructive pulmonary" OR "chronic obstructive  
 lung" OR "chronic obstructive respiratory" OR diabetes OR "coronary heart  
 disease\*" OR neoplasm\* OR cancer\* )))) OR ( TITLE-ABS-  
 KEY ( ( hypertension OR hypertriglycerid?emi\* OR "hyper triglycerid?emi\*" OR "high  
 triglyceride\*" OR "high  
 cholesterol" OR hypercholesterol?emi\* OR hyperlipid?emia\* OR hyperlipidemi\* )))) OR ( TIT  
 LE-ABS-KEY ( ( "diastolic pressure" OR "systolic pressure" OR "blood  
 pressure" OR "cardiometabolic syndrome\*")) OR ( TITLE-ABS-  
 KEY ( ( copd OR asthma OR "renal disease\*" OR "kidney disease\*")))) AND ( TITLE-ABS-  
 KEY ( ( ( "primary care" OR "primary health care" OR "primary healthcare" OR "primary health  
 system\*" OR "primary medical service\*" OR "primary medical care" OR "first-level  
 healthcare" OR "first-level health care" OR "first-level health system\*" OR "first-level health  
 facilit\*" OR "local health system\*" OR "local health care" OR "local healthcare" OR "local-level  
 health\*" ) W/0 ( need\* OR demand\* )))) OR ((( TITLE-ABS-KEY ( ("chronic  
 disease\*" OR "chronic disorder\*" OR "chronic\* sick\*" OR "chronic health  
 condition\*" OR "chronic medical condition\*" OR "chronic\* ill\*" OR "long term  
 condition\*" OR multimorbidit\* OR "mult imorbidit\*")) OR ( TITLE-ABS-KEY ( ("non-  
 communicable disease\*" OR "non-infectious disease\*" OR "noncommunicable  
 disease\*" OR "noninfectious disease\*")) OR ( TITLE-ABS-KEY ( ("cardiovascular  
 disease\*" OR "coronary artery disease\*" OR "myocardial isch?emia" OR "myocardial  
 infarct\*" OR "pulmonary disease\*" OR "chronic obstructive pulmonary" OR "chronic obstructive  
 lung" OR "chronic obstructive respiratory" OR diabetes OR "coronary heart  
 disease\*" OR neoplasm\* OR cancer\* )))) OR ( TITLE-ABS-  
 KEY ( ( hypertension OR hypertriglycerid?emi\* OR "hyper triglycerid?emi\*" OR "high  
 triglyceride\*" OR "high  
 cholesterol" OR hypercholesterol?emi\* OR hyperlipid?emia\* OR hyperlipidemi\* )))) OR ( TIT  
 LE-ABS-KEY ( ( "diastolic pressure" OR "systolic pressure" OR "blood  
 pressure" OR "cardiometabolic syndrome\*")) OR ( TITLE-ABS-  
 KEY ( ( copd OR asthma OR "renal disease\*" OR "kidney disease\*")))) AND ( TITLE-ABS-  
 KEY ( ( ( primary OR "first-  
 level" OR local ) W/2 health\* W/2 ( clinic\* OR center\* OR centre\* OR setting\* ) W/2 ( need  
 \* OR demand\* )))) AND ( LIMIT-  
 TO ( LANGUAGE , "English" ) ) AND ( EXCLUDE ( DOCTYPE , "ch" ) OR EXCLUDE ( DOC  
 TYPE , "no" ) OR EXCLUDE ( DOCTYPE , "bk" ) OR EXCLUDE ( DOCTYPE , "ed" ) ) AND  
 ( EXCLUDE ( SUBJAREA , "AGRI" ) OR EXCLUDE ( SUBJAREA , "CENG" ) OR EXCLUD  
 E ( SUBJAREA , "ARTS" ) OR EXCLUDE ( SUBJAREA , "BUSI" ) OR EXCLUDE ( SUBJAR  
 EA , "EART" ) OR EXCLUDE ( SUBJAREA , "VETE" ) ) View less

**Table S2. A list of the excluded studies and reasons for their exclusion**

| SL | Study                                                                                                                                                                                                                                                                                                                                                                                              | Reason for exclusion                                    |
|----|----------------------------------------------------------------------------------------------------------------------------------------------------------------------------------------------------------------------------------------------------------------------------------------------------------------------------------------------------------------------------------------------------|---------------------------------------------------------|
| 01 | Abolhassani N, Santos-Eggimann B, Chiolero A, Santschi V, Henchoz Y. Readiness to accept health information and communication technologies: A population-based survey of community-dwelling older adults. <i>International Journal of Medical Informatics</i> 2019; <b>130</b> : 103950.                                                                                                           | Not relevant to the theme for review                    |
| 02 | Acton KJ, Shields R, Rith-Najarian S, et al. Applying the diabetes quality improvement project indicators in the Indian Health Service primary care setting. <i>Diabetes Care</i> ; <b>24</b> (1): 22-6.                                                                                                                                                                                           | Inadequate or inappropriate results                     |
| 03 | Ahmed S, Chowdhury MA, Khan MA, Huq NL, Naheed A. Access to primary health care for acute vascular events in rural low income settings: a mixed methods study. <i>BMC Health Services Research</i> ; <b>17</b> (1): 47.                                                                                                                                                                            | Inadequate or inappropriate results                     |
| 04 | Allenby A, Kinsman L, Tham R, Symons J, Jones M, Campbell S. The quality of cardiovascular disease prevention in rural primary care. <i>Australian Journal of Rural Health</i> ; <b>24</b> (2): 92-8.                                                                                                                                                                                              | Inadequate or inappropriate results                     |
| 05 | Armour CL, Reddel HK, Lemay KS, et al. Feasibility and Effectiveness of an Evidence-Based Asthma Service in Australian Community Pharmacies: A Pragmatic Cluster Randomized Trial. <i>Journal of Asthma</i> 2013; <b>50</b> (3): 302-9.                                                                                                                                                            | Not relevant to the theme for review                    |
| 06 | Alzubaidi HT, Chandir S, Hasan S, McNamara K, Cox R, Krass I. Diabetes and cardiovascular disease risk screening model in community pharmacies in a developing primary healthcare system: A feasibility study.                                                                                                                                                                                     | Inadequate or inappropriate results                     |
| 07 | Ahmedov M, Green J, Azimov R, Avezova G, Inakov S, Mamatkulov B. Addressing the challenges of improving primary care quality in Uzbekistan: a qualitative study of chronic heart failure management. <i>Health Policy &amp; Planning</i> ; <b>28</b> (5): 458-66.                                                                                                                                  | Inadequate or inappropriate results                     |
| 08 | Aryal BK, Daud M, Thapa A, Mahotra A, Ale Magar S, Malla CK. Assessment of Health Facilities for Implementation of Non-communicable Disease Package. <i>Journal of Nepal Health Research Council</i> ; <b>16</b> (2): 149-55.                                                                                                                                                                      | Combined data on primary and secondary healthcare level |
| 09 | Banasiak NC. Implementation of the Asthma Control Test in Primary Care to Improve Patient Outcomes. <i>Journal of Pediatric Healthcare</i> 2018; <b>32</b> (6): 591-9.                                                                                                                                                                                                                             | Not relevant to the theme for review                    |
| 10 | Barcelos MRB, Nunes BP, Duro SMS, et al. Utilization of Breast Cancer Screening in Brazil: An External Assessment of Primary Health Care Access and Quality Improvement Program.                                                                                                                                                                                                                   | Not relevant to the theme for review                    |
| 11 | Bello AK, Ronksley PE, Tangri N, et al. Quality of Chronic Kidney Disease Management in Canadian Primary Care. <i>JAMA Network Open</i> ; <b>2</b> (9): e1910704.                                                                                                                                                                                                                                  | Inadequate or inappropriate results                     |
| 12 | Baeza JI, Fitzgerald L, McGivern G. Change capacity: the route to service improvement in primary care. <i>Quality in Primary Care</i> ; <b>16</b> (6): 401-7.                                                                                                                                                                                                                                      | Inadequate or inappropriate results                     |
| 13 | Bawazir AA, Al-Surimi K, Suwaidan SD, AlShehri AM, AlFarhan AI, Aboufotouh MA. Capacity and readiness of primary health care centers for implementation of the basic strategy for prevention and control of non-communicable diseases in Saudi Arabia. A case study from the Ministry of National Guard-Health Affairs, Riyadh, Saudi Arabia. <i>Saudi Medical Journal</i> ; <b>40</b> (6): 614-8. | Inappropriate study type (n=1)                          |
| 14 | Boehmer KR, Kyriacou M, Behnken E, Branda M, Montori VM. Patient capacity for self-care in the medical record of patients with                                                                                                                                                                                                                                                                     | Not relevant to the theme for review                    |

|    |                                                                                                                                                                                                                                                                          |                                                         |
|----|--------------------------------------------------------------------------------------------------------------------------------------------------------------------------------------------------------------------------------------------------------------------------|---------------------------------------------------------|
|    | chronic conditions: a mixed-methods retrospective study. <i>BMC family practice</i> 2018; <b>19</b> (1): 164.                                                                                                                                                            |                                                         |
| 15 | Bindman AB, Grumbach K, Osmond D, Vranizan K, Stewart AL. Primary care and receipt of preventive services.                                                                                                                                                               | Inadequate or inappropriate results                     |
| 16 | Birabwa C, Bwambale MF, Waiswa P, Mayega RW. Quality and barriers of outpatient diabetes care in rural health facilities in Uganda - a mixed methods study. <i>BMC Health Services Research</i> ; <b>19</b> (1): 706.                                                    | Combined data on primary and secondary healthcare level |
| 17 | Brownson CA, Miller D, Crespo R, et al. A quality improvement tool to assess self-management support in primary care. <i>Joint Commission Journal on Quality &amp; Patient Safety</i> ; <b>33</b> (7): 408-16.                                                           | Inadequate or inappropriate results                     |
| 18 | Casalino LP, Wu FM, Ryan AM, et al. Independent practice associations and physician-hospital organizations can improve care management for smaller practices. <i>Health Affairs</i> ; <b>32</b> (8): 1376-82.                                                            | Inadequate or inappropriate results                     |
| 19 | Chavannes NH. Integrated chronic obstructive pulmonary disease management in primary care. <i>Disease Management &amp; Health Outcomes</i> 2008; <b>16</b> (5): 315-8.                                                                                                   | Inadequate or inappropriate results                     |
| 20 | Chen M, Patel T, Chang F. The impact of a primary care, pharmacist-driven intervention in patients with chronic non-cancer pain-A pilot study. <i>Pharmacy</i> 2020; <b>8</b> (8): 113.                                                                                  | Not relevant to the theme for review                    |
| 21 | Chen XRC, Leung SH, Li YC. Chronic Obstructive Pulmonary Disease (COPD) management in the community: how could primary care team contribute? <i>BMC family practice</i> 2020; <b>21</b> (1): 184.                                                                        | Not relevant to the theme for review                    |
| 22 | Collins S. Primary care shortages: Strengthening this sector is urgently needed, now and in preparation for healthcare reform. <i>American Health and Drug Benefits</i> 2012; <b>5</b> (1): 40-7.                                                                        | Inadequate or inappropriate results                     |
| 23 | Chen LW, Nguyen AT, Jacobson J, Palm D. Assessment of workforce capacity for Local Health Departments in Nebraska: a perspective from public health programmatic areas. <i>Journal of Public Health Management &amp; Practice</i> ; <b>18</b> (6): 595-601.              | Not relevant to the theme for review                    |
| 24 | Chen LM, Sakshaug JW, Miller DC, Rosland A-M, Hollingsworth J. The association among medical home readiness, quality, and care of vulnerable patients. <i>Am J Manag Care</i> 2015; <b>21</b> (8): e480-e6.                                                              | Inadequate or inappropriate results                     |
| 25 | Day A, Oldroyd C, Godfrey S, Quinn T. Availability of cardiac equipment in general practice premises in a cardiac network: A survey. <i>British Journal of Cardiology</i> 2008; <b>15</b> (3): 141-4.                                                                    | Inadequate or inappropriate results                     |
| 26 | Deckard GJ, Borkowski N, Diaz D, Sanchez C, Boissette SA. Improving timeliness and efficiency in the referral process for safety net providers: Application of the lean six sigma methodology. <i>Journal of Ambulatory Care Management</i> 2010; <b>33</b> (2): 124-30. | Not relevant to the theme for review                    |
| 27 | Depatie A, Bigbee JL. Rural Older Adult Readiness to Adopt Mobile Health Technology: A Descriptive Study. <i>Online Journal of Rural Nursing &amp; Health Care</i> 2015; <b>15</b> (1): 150-84.                                                                          | Inadequate or inappropriate results                     |
| 28 | Due TD, Thorsen T, Waldorff FB, Kousgaard MB. Role enactment of facilitation in primary care - a qualitative study. <i>BMC Health Services Research</i> ; <b>17</b> (1): 593.                                                                                            | Not relevant to the theme for review                    |
| 29 | Fleck S. Unified health services and family focused primary care.                                                                                                                                                                                                        | Not relevant to the theme for review                    |
| 30 | Foo KM, Sundram M, Legido-Quigley H. Facilitators and barriers of managing patients with multiple chronic conditions in the community: a qualitative study. <i>BMC public health</i> 2020; <b>20</b> (1): 273.                                                           | Inadequate or inappropriate results                     |
| 31 | Fortin M, Chouinard M-C, Diallo BB, Bouhali T. Integration of chronic disease prevention and management services into primary care (PR1MaC): findings from an embedded qualitative study. <i>BMC Family Practice</i> 2019; <b>20</b> (1): 1-8.                           | Inadequate or inappropriate results                     |

|    |                                                                                                                                                                                                                                                                                                                         |                                                         |
|----|-------------------------------------------------------------------------------------------------------------------------------------------------------------------------------------------------------------------------------------------------------------------------------------------------------------------------|---------------------------------------------------------|
| 32 | Fox CH, Brooks A, Zayas LE, McClellan W, Murray B. Primary care physicians' knowledge and practice patterns in the treatment of chronic kidney disease: an Upstate New York Practice-based Research Network (UNYNET) study. <i>Journal of the American Board of Family Medicine: JABFM</i> ; <b>19</b> (1): 54-61.      | Not relevant to the theme for review                    |
| 33 | Fuchs S, Jaffe DM, Christoffel KK. Pediatric emergencies in office practices: prevalence and office preparedness. <i>Pediatrics</i> ; <b>83</b> (6): 931-9.                                                                                                                                                             | Not relevant to the theme for review                    |
| 34 | Furno M. The primary role: How the availability of primary care physicians affects diabetes care management.                                                                                                                                                                                                            | Inadequate or inappropriate results                     |
| 35 | Galaviz KI, Narayan KMV, Manders OC, et al. The Public Health Leadership and Implementation Academy for Noncommunicable Diseases. <i>Preventing Chronic Disease</i> ; <b>16</b> : E49.                                                                                                                                  | Inadequate or inappropriate results                     |
| 36 | Ghimire U, Shrestha N, Adhikari B, Mehata S, Pokharel Y, Mishra SR. Health system's readiness to provide cardiovascular, diabetes and chronic respiratory disease related services in Nepal: analysis using 2015 health facility survey. <i>BMC Public Health</i> 2020; <b>20</b> (1): 1163.                            | Combined data on primary and secondary healthcare level |
| 37 | Gerbert B, Maurer T, Berger T, et al. Primary care physicians as gatekeepers in managed care. Primary care physicians' and dermatologists' skills at secondary prevention of skin cancer. <i>Archives of Dermatology</i> ; <b>132</b> (9): 1030-8.                                                                      | Inadequate or inappropriate results                     |
| 38 | Gordon NP, Hornbrook MC. Older adults' readiness to engage with eHealth patient education and self-care resources: a cross-sectional survey. <i>BMC health services research</i> 2018; <b>18</b> (1): 220.                                                                                                              | Not relevant to the theme for review                    |
| 39 | Goytia EJ, Rapkin B, Weiss ES, Golub D, Guzman V, O'Connor M. Readiness and capacity of librarians in public libraries to implement a breast cancer outreach and screening campaign in medically underserved communities. <i>Cancer control : journal of the Moffitt Cancer Center</i> 2005; <b>12 Suppl 2</b> : 13-20. | Not relevant to the theme for review                    |
| 40 | Gujral UP, Johnson L, Nielsen J, et al. Preparedness cycle to address transitions in diabetes care during the COVID-19 pandemic and future outbreaks. <i>BMJ Open Diabetes Research &amp; Care</i> 2020; <b>8</b> (1): 07.                                                                                              | Not relevant to the theme for review                    |
| 41 | Haileamlak A. Preparedness to Respond to the Ever-increasing Cancer Cases. <i>Ethiopian Journal of Health Sciences</i> ; <b>25</b> (4): 293-4.                                                                                                                                                                          | Not relevant to the theme for review                    |
| 42 | Hanusaiik N, O'Loughlin JL, Kishchuk N, Paradis G, Cameron R. Organizational capacity for chronic disease prevention: a survey of Canadian public health organizations. <i>European Journal of Public Health</i> ; <b>20</b> (2): 195-201.                                                                              | Combined data on primary and secondary healthcare level |
| 43 | Henderson KH, DeWalt DA, Halladay J, et al. Organizational Leadership and Adaptive Reserve in Blood Pressure Control: The Heart Health NOW Study. <i>Annals of Family Medicine</i> ; <b>16</b> (Suppl 1): S29-S34.                                                                                                      | Inadequate or inappropriate results                     |
| 44 | Heslop L, Power R, Cranwell K. Building workforce capacity for complex care coordination: a function analysis of workflow activity. <i>Human Resources for Health [Electronic Resource]</i> ; <b>12</b> : 52.                                                                                                           | Not relevant to the theme for review                    |
| 45 | Geboers et al.                                                                                                                                                                                                                                                                                                          | Inadequate or inappropriate results                     |
| 46 | Inrig SJ, Higashi RT, Tiro JA, Argenbright KE, Lee SJ. Assessing local capacity to expand rural breast cancer screening and patient navigation: An iterative mixed-method tool. <i>Evaluation and program planning</i> 2017; <b>61</b> : 113-24.                                                                        | Inadequate or inappropriate results                     |
| 47 | Jayanna K, Swaroop N, Kar A, et al. Designing a comprehensive Non-Communicable Diseases (NCD) programme for hypertension                                                                                                                                                                                                | Inadequate or inappropriate results                     |

|    |                                                                                                                                                                                                                                                                                                                               |                                                         |
|----|-------------------------------------------------------------------------------------------------------------------------------------------------------------------------------------------------------------------------------------------------------------------------------------------------------------------------------|---------------------------------------------------------|
|    | and diabetes at primary health care level: evidence and experience from urban Karnataka, South India. <i>BMC Public Health</i> 2019; <b>19</b> (1): 409.                                                                                                                                                                      |                                                         |
| 48 | Jigjidsuren A, Byambaa T, Altangerel E, et al. Free and universal access to primary healthcare in Mongolia: the service availability and readiness assessment. <i>BMC Health Services Research</i> ; <b>19</b> (1): 129.                                                                                                      | Inadequate or inappropriate results                     |
| 49 | Jin Y, Zhu W, Yuan B, Meng Q. Impact of health workforce availability on health care seeking behavior of patients with diabetes mellitus in China.                                                                                                                                                                            | Combined data on primary and secondary healthcare level |
| 50 | Joffres C, Heath S, Farquharson J, et al. Defining and operationalizing capacity for heart health promotion in Nova Scotia, Canada. <i>Health Promotion International</i> 2004; <b>19</b> (1): 39-49.                                                                                                                         | Not relevant to the theme for review                    |
| 51 | Jones D, West R, Lester C. Evaluation of changes in primary health care availability and provision from the patient perspective.                                                                                                                                                                                              | Inadequate or inappropriate results                     |
| 52 | Jones R, Ostrem A. Optimising pharmacological maintenance treatment for COPD in primary care. <i>Primary Care Respiratory Journal</i> 2011; <b>20</b> (1): 33-45.                                                                                                                                                             | Inadequate or inappropriate results                     |
| 53 | Kayser L, Rossen S, Karnoe A, et al. Development of the Multidimensional Readiness and Enablement Index for Health Technology (READHY) Tool to Measure Individuals' Health Technology Readiness: Initial Testing in a Cancer Rehabilitation Setting. <i>Journal of medical Internet research</i> 2019; <b>21</b> (2): e10377. | Inadequate or inappropriate results                     |
| 54 | Khunti K, Baker R, Rumsey M, Lakhani M. Approaches to the organization of multi-practice audits in primary health care in the UK. <i>International Journal for Quality in Health Care</i> ; <b>11</b> (3): 221-6.                                                                                                             | Inadequate or inappropriate results                     |
| 55 | Kaufman ND, Rajataramya B, Tanomsingh S, Ronis DL, Potempa K. Nurse preparedness for the non-communicable disease escalation in Thailand: a cross-sectional survey of nurses. <i>Nursing &amp; Health Sciences</i> 2012; <b>14</b> (1): 32-7.                                                                                 | Inadequate or inappropriate results                     |
| 56 | Laatikainen T, Inglin L, Collins D, et al. Implementing Package of Essential Non-communicable Disease Interventions in the Republic of Moldova-a feasibility study. <i>Eur J Public Health</i> 2020.                                                                                                                          | Inadequate or inappropriate results                     |
| 57 | Landon BE, Hicks LS, O'Malley AJ, et al. Improving the management of chronic disease at community health centers. <i>New England Journal of Medicine</i> 2007; <b>356</b> (9): 921-34.                                                                                                                                        | Inadequate or inappropriate results                     |
| 58 | Langer S, Chew-Graham CA, Drinkwater J, et al. A motivational intervention for patients with COPD in primary care: qualitative evaluation of a new practitioner role. <i>BMC Family Practice</i> ; <b>15</b> : 164.                                                                                                           | Inadequate or inappropriate results                     |
| 59 | Liu J, Yin H, Zheng T, et al. Primary health institutions preference by hypertensive patients: Effect of distance, trust and quality of management in the rural Heilongjiang province of China.                                                                                                                               | Inadequate or inappropriate results                     |
| 60 | Maarse JA, Ruwaard D, Spreeuwenberg C. The governance of quality management in dutch health care: new developments and strategic challenges. <i>Quality Management in Health Care</i> ; <b>22</b> (3): 236-47.                                                                                                                | Not relevant to the theme for review                    |
| 61 | Madueno A, Martin A, Peculo JA, Anton E, Paravisini A, Leon A. Usefulness of inspiratory capacity measurement in COPD patients in the primary care setting. <i>International Journal of General Medicine</i> 2009; <b>2</b> : 219-25.                                                                                         | Combined data on primary and secondary healthcare level |
| 62 | Main DS, Cohen SJ, DiClemente CC. Measuring physician readiness to change cancer screening: Preliminary results. <i>American Journal of Preventive Medicine</i> 1995; <b>11</b> (1): 54-8.                                                                                                                                    | Inadequate or inappropriate results                     |
| 63 | Monaghan M, Hilliard M, Sweenie R, Riekert K. Transition readiness in adolescents and emerging adults with diabetes: the role                                                                                                                                                                                                 | Inadequate or inappropriate results                     |

|    |                                                                                                                                                                                                                                                                                                                                                               |                                                         |
|----|---------------------------------------------------------------------------------------------------------------------------------------------------------------------------------------------------------------------------------------------------------------------------------------------------------------------------------------------------------------|---------------------------------------------------------|
|    | of patient-provider communication. <i>Current Diabetes Reports</i> ; <b>13</b> (6): 900-8.                                                                                                                                                                                                                                                                    |                                                         |
| 64 | Moynihan M, Saewyc E, Whitehouse S, Paone M, McPherson G. Assessing readiness for transition from paediatric to adult health care: Revision and psychometric evaluation of the Am I ON TRAC for Adult Care questionnaire. <i>Journal of Advanced Nursing</i> ; <b>71</b> (6): 1324-35.                                                                        | Inadequate or inappropriate results                     |
| 65 | Neher M, Landen Ludvigsson M, Enblom A. Preparedness to Implement Physical Activity and Rehabilitation Guidelines in Routine Primary Care Cancer Rehabilitation: Focus Group Interviews Exploring Rehabilitation Professionals' Perceptions. <i>Journal of cancer education : the official journal of the American Association for Cancer Education</i> 2020. | Inadequate or inappropriate results                     |
| 66 | Nilsson GH, Skånér Y, Krakau I, Hassler E, Sundquist K. Primary prevention of first-ever stroke in primary health care: A clinical practice study based on medical register data in sweden.                                                                                                                                                                   | Inadequate or inappropriate results                     |
| 67 | Nuno-Solinis R. Are Healthcare Organizations Ready for Change? Comment on "Development and Content Validation of a Transcultural Instrument to Assess Organizational Readiness for Knowledge Translation in Healthcare Organizations: The OR4KT". <i>International Journal of Health Policy &amp; Management</i> ; <b>7</b> (12): 1158-60.                    | Inadequate or inappropriate results                     |
| 68 | Nyarko KM, Ameme DK, Ocansey D, Comneh E, Markwei MT, Ohene SA. Capacity assessment of selected health care facilities for the pilot implementation of Package for Essential Non-communicable Diseases (PEN) intervention in Ghana. <i>The Pan African medical journal</i> ; <b>25</b> (Suppl 1): 16.                                                         | Combined data on primary and secondary healthcare level |
| 69 | Ogbimi RI. Leadership in Nigerian health system for cancer prevention and control. <i>African Journal of Medicine &amp; Medical Sciences</i> ; <b>38</b> Suppl 2: 49-53.                                                                                                                                                                                      | Inadequate or inappropriate results                     |
| 70 | Ostroff JS, Copeland A, Borderud SP, Li Y, Shelley DR, Henschke CI. Readiness of lung cancer screening sites to deliver smoking cessation treatment: Current practices, organizational priority, and perceived barriers. <i>Nicotine &amp; Tobacco Research</i> 2016; <b>18</b> (5): 1067-75.                                                                 | Not relevant to the theme for review                    |
| 71 | Oyewole EY, Ojewale LY, Abimbola OO. Primary Health Care Nurses' Competencies and Resources Availability for Diabetes Mellitus Care at Local Government Areas of Ibadan. <i>International Journal of Caring Sciences</i> 2020; <b>13</b> (1): 368-80.                                                                                                         | Not relevant to the theme for review                    |
| 72 | Parchman ML, Anderson ML, Coleman K, et al. Assessing quality improvement capacity in primary care practices. <i>BMC Family Practice</i> ; <b>20</b> (1): 103.                                                                                                                                                                                                | Not relevant to the theme for review                    |
| 73 | Pilkerton CS, Singh SS, Bias TK, Frisbee SJ. Healthcare resource availability and cardiovascular health in the USA. <i>BMJ Open</i> 2017; <b>7</b> (12): e016758.                                                                                                                                                                                             | Not relevant to the theme for review                    |
| 74 | Radin A, Cote C. Primary care of the patient with chronic obstructive pulmonary disease-part 1: frontline prevention and early diagnosis. <i>American Journal of Medicine</i> ; <b>121</b> (7 Suppl): S3-12.                                                                                                                                                  | Inadequate or inappropriate results                     |
| 75 | Rathish D, Premarathna I, Jayathilake T, et al. Availability of essential medicines in selected public, primary and secondary health care institutions of a rural Sri Lankan district: A spot survey.                                                                                                                                                         | Combined data on primary and secondary healthcare level |
| 76 | Rogers HE, Akiteng AR, Mutungi G, Ettinger AS, Schwartz JI. Capacity of Ugandan public sector health facilities to prevent and                                                                                                                                                                                                                                | Combined data on primary and secondary healthcare level |

|    |                                                                                                                                                                                                                                                                                                    |                                                         |
|----|----------------------------------------------------------------------------------------------------------------------------------------------------------------------------------------------------------------------------------------------------------------------------------------------------|---------------------------------------------------------|
|    | control non-communicable diseases: an assessment based upon WHO-PEN standards. <i>BMC Health Services Research</i> ; <b>18</b> (1): 606.                                                                                                                                                           |                                                         |
| 77 | Roper KL, Thomas AR, Hieronymus L, Brock A, Keck J. Patient and Clinician Perceptions of Prediabetes: A Mixed-Methods Primary Care Study. <i>Diabetes Educ</i> 2019; <b>45</b> (3): 302-14.                                                                                                        | Inadequate or inappropriate results                     |
| 78 | Schwartz R, Smith C, Speers MA, et al. Capacity building and resource needs of state health agencies to implement community-based cardiovascular disease programs. <i>Journal of Public Health Policy</i> 1993; <b>14</b> (4): 480-94.                                                             | Inadequate or inappropriate results                     |
| 79 | Shaw RJ, Kaufman MA, Bosworth HB, et al. Organizational factors associated with readiness to implement and translate a primary care based telemedicine behavioral program to improve blood pressure control: the HTN-IMPROVE study. <i>Implementation Science</i> ; <b>8</b> : 106.                | Inadequate or inappropriate results                     |
| 80 | Sorensen A, Le LW, Swami N, et al. Readiness for delivering early palliative care: A survey of primary care and specialised physicians. <i>Palliative Medicine</i> 2020; <b>34</b> (1): 114-25.                                                                                                    | Combined data on primary and secondary healthcare level |
| 81 | Soylu TG, Cuellar AE, Goldberg DG, Kuzel AJ. Readiness and Implementation of Quality Improvement Strategies Among Small- and Medium-Sized Primary Care Practices: an Observational Study. <i>Journal of General Internal Medicine</i> 2020.                                                        | Not relevant to the theme for review                    |
| 82 | Tanjasiri SP, Tran JH. Community capacity for cancer control collaboration: weaving an Islander Network for Cancer Awareness, Research and Training for Pacific Islanders in Southern California. <i>Cancer Detection &amp; Prevention</i> ; <b>32 Suppl 1</b> : S37-40.                           | Inadequate or inappropriate results                     |
| 83 | Tompkins JW, Mequanint S, Barre DE, et al. National Survey of Indigenous primary healthcare capacity and delivery models in Canada: the TransFORMation of IndiGENous PrimAry HEAlthcare delivery (FORGE AHEAD) community profile survey. <i>BMC Health Services Research</i> ; <b>18</b> (1): 828. | Combined data on primary and secondary healthcare level |
| 84 | Weeks DL, Polello JM, Hansen DT, Keeney BJ, Conrad DA. Measuring primary care organizational capacity for diabetes care coordination: the Diabetes Care Coordination Readiness Assessment. <i>Journal of General Internal Medicine</i> ; <b>29</b> (1): 98-103.                                    | Not relevant to the theme for review                    |



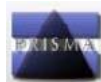

## PRISMA 2020 Checklist

| Section and Topic             | Item # | Checklist item                                                                                                                                                                                                                                                                                       | Location where item is reported                                                                      |
|-------------------------------|--------|------------------------------------------------------------------------------------------------------------------------------------------------------------------------------------------------------------------------------------------------------------------------------------------------------|------------------------------------------------------------------------------------------------------|
| <b>TITLE</b>                  |        |                                                                                                                                                                                                                                                                                                      |                                                                                                      |
| Title                         | 1      | Identify the report as a systematic review.                                                                                                                                                                                                                                                          | Lines 2-3, Page 1                                                                                    |
| <b>ABSTRACT</b>               |        |                                                                                                                                                                                                                                                                                                      |                                                                                                      |
| Abstract                      | 2      | See the PRISMA 2020 for Abstracts checklist.                                                                                                                                                                                                                                                         | Lines 25-48, Page 2                                                                                  |
| <b>INTRODUCTION</b>           |        |                                                                                                                                                                                                                                                                                                      |                                                                                                      |
| Rationale                     | 3      | Describe the rationale for the review in the context of existing knowledge.                                                                                                                                                                                                                          | Lines 90-117, Page 4-5                                                                               |
| Objectives                    | 4      | Provide an explicit statement of the objective(s) or question(s) the review addresses.                                                                                                                                                                                                               | Lines 121-122, Page 45                                                                               |
| <b>METHODS</b>                |        |                                                                                                                                                                                                                                                                                                      |                                                                                                      |
| Eligibility criteria          | 5      | Specify the inclusion and exclusion criteria for the review and how studies were grouped for the syntheses.                                                                                                                                                                                          | Lines 132-137, Page 6                                                                                |
| Information sources           | 6      | Specify all databases, registers, websites, organisations, reference lists and other sources searched or consulted to identify studies. Specify the date when each source was last searched or consulted.                                                                                            | Lines 146-161, Page 7                                                                                |
| Search strategy               | 7      | Present the full search strategies for all databases, registers and websites, including any filters and limits used.                                                                                                                                                                                 | Supplementary materials                                                                              |
| Selection process             | 8      | Specify the methods used to decide whether a study met the inclusion criteria of the review, including how many reviewers screened each record and each report retrieved, whether they worked independently, and if applicable, details of automation tools used in the process.                     | Lines 192-208, Page 8-9                                                                              |
| Data collection process       | 9      | Specify the methods used to collect data from reports, including how many reviewers collected data from each report, whether they worked independently, any processes for obtaining or confirming data from study investigators, and if applicable, details of automation tools used in the process. | Lines 181-190, Page 8                                                                                |
| Data items                    | 10a    | List and define all outcomes for which data were sought. Specify whether all results that were compatible with each outcome domain in each study were sought (e.g. for all measures, time points, analyses), and if not, the methods used to decide which results to collect.                        | Lines 209-218, Page 9                                                                                |
|                               | 10b    | List and define all other variables for which data were sought (e.g. participant and intervention characteristics, funding sources). Describe any assumptions made about any missing or unclear information.                                                                                         | Lines 209-218, Page 9                                                                                |
| Study risk of bias assessment | 11     | Specify the methods used to assess risk of bias in the included studies, including details of the tool(s) used, how many reviewers assessed each study and whether they worked independently, and if applicable, details of automation tools used in the process.                                    | Lines 192-202, Page 8                                                                                |
| Effect measures               | 12     | Specify for each outcome the effect measure(s) (e.g. risk ratio, mean difference) used in the synthesis or presentation of results.                                                                                                                                                                  | Result was thematically presented in descriptive manner. Therefore, no effect measure was presented. |
| Synthesis methods             | 13a    | Describe the processes used to decide which studies were eligible for each synthesis (e.g. tabulating the study intervention characteristics and comparing against the planned groups for each synthesis (item #5)).                                                                                 | Lines 192-202, Page 8                                                                                |

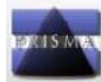

## PRISMA 2020 Checklist

| Section and Topic             | Item # | Checklist item                                                                                                                                                                                                                                                                       | Location where item is reported                                                           |
|-------------------------------|--------|--------------------------------------------------------------------------------------------------------------------------------------------------------------------------------------------------------------------------------------------------------------------------------------|-------------------------------------------------------------------------------------------|
|                               | 13b    | Describe any methods required to prepare the data for presentation or synthesis, such as handling of missing summary statistics, or data conversions.                                                                                                                                | Lines 192-202, Page 8                                                                     |
|                               | 13c    | Describe any methods used to tabulate or visually display results of individual studies and syntheses.                                                                                                                                                                               | Lines 192-202, Page 8                                                                     |
|                               | 13d    | Describe any methods used to synthesize results and provide a rationale for the choice(s). If meta-analysis was performed, describe the model(s), method(s) to identify the presence and extent of statistical heterogeneity, and software package(s) used.                          | No meta-analysis performed                                                                |
|                               | 13e    | Describe any methods used to explore possible causes of heterogeneity among study results (e.g. subgroup analysis, meta-regression).                                                                                                                                                 | No meta-analysis performed                                                                |
|                               | 13f    | Describe any sensitivity analyses conducted to assess robustness of the synthesized results.                                                                                                                                                                                         | No sensitivity                                                                            |
| Reporting bias assessment     | 14     | Describe any methods used to assess risk of bias due to missing results in a synthesis (arising from reporting biases).                                                                                                                                                              | Lines 192-202, Page 8                                                                     |
| Certainty assessment          | 15     | Describe any methods used to assess certainty (or confidence) in the body of evidence for an outcome.                                                                                                                                                                                | Not applicable in this review                                                             |
| <b>RESULTS</b>                |        |                                                                                                                                                                                                                                                                                      |                                                                                           |
| Study selection               | 16a    | Describe the results of the search and selection process, from the number of records identified in the search to the number of studies included in the review, ideally using a flow diagram.                                                                                         | Lines 229-246, Page 10                                                                    |
|                               | 16b    | Cite studies that might appear to meet the inclusion criteria, but which were excluded, and explain why they were excluded.                                                                                                                                                          | Supplementary materials                                                                   |
| Study characteristics         | 17     | Cite each included study and present its characteristics.                                                                                                                                                                                                                            | Lines 229-246, Page 10                                                                    |
| Risk of bias in studies       | 18     | Present assessments of risk of bias for each included study.                                                                                                                                                                                                                         | Lines 192-202, Page 8                                                                     |
| Results of individual studies | 19     | For all outcomes, present, for each study: (a) summary statistics for each group (where appropriate) and (b) an effect estimate and its precision (e.g. confidence/credible interval), ideally using structured tables or plots.                                                     | Result was presented thematically. Therefore, no table/confidence interval was presented. |
| Results of syntheses          | 20a    | For each synthesis, briefly summarise the characteristics and risk of bias among contributing studies.                                                                                                                                                                               | Not exactly relevant in this review as reported was described under themes                |
|                               | 20b    | Present results of all statistical syntheses conducted. If meta-analysis was done, present for each the summary estimate and its precision (e.g. confidence/credible interval) and measures of statistical heterogeneity. If comparing groups, describe the direction of the effect. | Not exactly relevant in this review as                                                    |

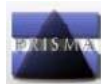

# PRISMA 2020 Checklist

| Section and Topic         | Item # | Checklist item                                                                                                                                 | Location where item is reported                                            |
|---------------------------|--------|------------------------------------------------------------------------------------------------------------------------------------------------|----------------------------------------------------------------------------|
|                           |        |                                                                                                                                                | reported was described under themes                                        |
|                           | 20c    | Present results of all investigations of possible causes of heterogeneity among study results.                                                 | Lines 473-481, Page 24                                                     |
|                           | 20d    | Present results of all sensitivity analyses conducted to assess the robustness of the synthesized results.                                     | Not exactly relevant in this review as reported was described under themes |
| Reporting biases          | 21     | Present assessments of risk of bias due to missing results (arising from reporting biases) for each synthesis assessed.                        | Not exactly relevant in this review as reported was described under themes |
| Certainty of evidence     | 22     | Present assessments of certainty (or confidence) in the body of evidence for each outcome assessed.                                            | Not exactly relevant in this review as reported was described under themes |
| <b>DISCUSSION</b>         |        |                                                                                                                                                |                                                                            |
| Discussion                | 23a    | Provide a general interpretation of the results in the context of other evidence.                                                              | Lines 420-468, Page 22-24                                                  |
|                           | 23b    | Discuss any limitations of the evidence included in the review.                                                                                | Lines 473-481, Page 24                                                     |
|                           | 23c    | Discuss any limitations of the review processes used.                                                                                          | Lines 473-481, Page 24                                                     |
|                           | 23d    | Discuss implications of the results for practice, policy, and future research.                                                                 | Lines 473-481, Page 24                                                     |
| <b>OTHER INFORMATION</b>  |        |                                                                                                                                                |                                                                            |
| Registration and protocol | 24a    | Provide registration information for the review, including register name and registration number, or state that the review was not registered. | Lines 128-130, Page 6                                                      |
|                           | 24b    | Indicate where the review protocol can be accessed, or state that a protocol was not prepared.                                                 | Protocol was not prepared                                                  |
|                           | 24c    | Describe and explain any amendments to information provided at registration or in the protocol.                                                | No amendment done                                                          |
| Support                   | 25     | Describe sources of financial or non-financial support for the review, and the role of the funders or sponsors in the review.                  | Lines 511, Page 25                                                         |

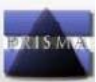

# PRISMA 2020 Checklist

1  
2  
3  
4  
5  
6  
7  
8  
9  
10  
11  
12  
13  
14  
15  
16  
17  
18  
19  
20  
21  
22  
23  
24  
25  
26  
27  
28  
29  
30  
31  
32  
33  
34  
35  
36  
37  
38  
39  
40  
41  
42  
43  
44  
45  
46  
47

| Section and Topic                              | Item # | Checklist item                                                                                                                                                                                                                             | Location where item is reported |
|------------------------------------------------|--------|--------------------------------------------------------------------------------------------------------------------------------------------------------------------------------------------------------------------------------------------|---------------------------------|
| Competing interests                            | 26     | Declare any competing interests of review authors.                                                                                                                                                                                         | Lines 505, Page 25              |
| Availability of data, code and other materials | 27     | Report which of the following are publicly available and where they can be found: template data collection forms; data extracted from included studies; data used for all analyses; analytic code; any other materials used in the review. | Lines 507, Page 25              |

From: Page MJ, McKenzie JE, Bossuyt PM, Boutron I, Hoffmann TC, Mulrow CD, et al. The PRISMA 2020 statement: an updated guideline for reporting systematic reviews. *BMJ* 2021;372:n71. doi: 10.1136/bmj.n71  
 For more information, visit: <http://www.prisma-statement.org/>

For peer review only
